# Supplementary material for: [Cp*RhCl2]2-catalyzed ortho-C–H bond amination of acetophenone o-methyloximes with primary N-chloroalkylamines: convenient synthesis of N-alkyl-2-acylanilines
Source: Royal Society of Chemistry journal article supplement (doi:10.1039/c3cc42937g), 2013-01-01

## Supporting Information

### **[Cp\*RhCl<sub>2</sub>]<sub>2</sub>-Catalyzed *ortho*-C-H Bond Amination of *O*-Methyl Aectophenone Oximes with Primary *N*-Chloroalkylamines. A Convenient Synthesis of *N*-Alkyl-2-acylanilines**

Ka-Ho Ng, Zhongyuan Zhou and Wing-Yiu Yu\*

*State Key Laboratory for Chirosciences and Department of Applied Biology and Chemical Technology, The Hong Kong Polytechnic University, Hung Hom, Kowloon, Hong Kong*

Email: [wing-yiu.yu@polyu.edu.hk](mailto:wing-yiu.yu@polyu.edu.hk)

#### **Table of Content**

|    |                                                                                          |         |
|----|------------------------------------------------------------------------------------------|---------|
| 1  | General Information                                                                      | S2      |
| 2  | Experimental Procedures and Characterizations                                            | S3-S9   |
| 3  | Amination Reactions with <i>N</i> -Chlorohexylamine and Characterizations                | S9-S11  |
| 4  | Preparation of <b>3fb</b> Crystal for X-ray Diffraction Analysis and the X-ray Structure | S11     |
| 5  | Stoichiometric Reactions and Characterizations                                           | S12-S13 |
| 6  | <i>O</i> -Methyloxime Arylamine Product Deprotection and Characterizations               | S14-S15 |
| 7  | Kinetic Isotope Effect Experiments                                                       | S15-S16 |
| 8  | Hammett Correlation Studies                                                              | S17-S18 |
| 9  | Reaction Optimization                                                                    | S18-S21 |
| 10 | References                                                                               | S21     |
| 11 | <sup>1</sup> H NMR and <sup>13</sup> C NMR spectra (COSY & NOSY for <b>3na-3Cl</b> )     | S22-S57 |

## **1. General Information:**

**General.** All the amination reactions were performed in amber 8 mL-vials equipped with Teflon<sup>®</sup> liner caps under an atmosphere of nitrogen. Thin layer chromatography was performed on silica gel plates. Flash column chromatography was performed on 230-400 mesh silica gel (NA Chemical). GC-MS analyses were performed on a 6890N-GC (Agilent Technology) with 5973Network-MS (Agilent Technology). <sup>1</sup>H, <sup>13</sup>C, DEPT 135° NMR analyses were performed on a Bruker (400 MHz) spectrometer. COSY and NOSY NMR analyses were performed on a Bruker (500 MHz) spectrometer. Chemical shifts (δ) were given in ppm, and the signals were referenced with the solvent residual peak(s). NMR yields and conversions were determined with dibromomethane (0.1 mmol) as the internal standard, which has a singlet signal (2H) at 4.9 ppm (in *d*-chloroform). IR spectra were obtained by a Nicolet-380 FT-IR spectrometer. Melting points were recorded on a BÜCHI-B-545 instrument and were uncorrected. High resolution mass spectra were obtained using a VG MICROMASS Fison VG platform and with an electrospray ionization mode.

**Materials.** All reagents were purchased commercially and were used as received. *O*-methyloximes were prepared from the corresponding ketones with methoxyamine hydrochloride in 1:1 methanol: H<sub>2</sub>O (for reaction with ethyl 4-acetylbenzoate, 1:1 ethanol: H<sub>2</sub>O) under reflux and stirred overnight (~18 h). (Products were purified by vacuum distillation for liquid oximes, and flash column chromatography for solid oximes). 4-(4-Methoxyphenyl)acetophenone was prepared by Suzuki-coupling with Pd(OAc)<sub>2</sub> and triphenylphosphine as the catalyst in toluene, 100 °C for 18 h. [Cp\*RhCl<sub>2</sub>]<sub>2</sub><sup>1</sup> and **4** ([Cp\*RhCl(2-phenylpyridine)])<sup>2</sup> were prepared according to the literature procedures. All the solvents were distilled or purified according to literature procedures.<sup>3</sup>

## 2. Experimental Procedures and Characterizations:

### 2.1 General Procedures for the Rh-Catalyzed C-H Aminations of Oxime

To an amber 8 mL-vial (vial **A**), [Cp\*RhCl<sub>2</sub>]<sub>2</sub> (5 mol %, 6.2 mg), CsOAc (1.3 equiv, 49.7 mg) and AgSbF<sub>6</sub> (1.5 equiv, 103 mg) were added, and the vial was sealed with a Teflon® liner cap. To another amber 4-mL vial (vial **B**), *N*-chlorosuccinimide (2.2 equiv, 58.7 mg) was added, and the vial was sealed with a Teflon® liner cap. Both vials were evacuated and back filled with N<sub>2</sub> for three times. Freshly distilled THF (1 mL) was added to the vial **A**, followed by the addition of the oxime (0.2 mmol) with a 50-μL syringe. Vial **A** was pre-heated at 40°C. THF (1 mL) and primary amine (2.2 equiv) were added to the vial **B**, and they were mixed and stirred for 10 min. The mixture in Vial **B** was taken up by a 2.5-mL syringe equipped with a long needle (L 6 in, size 22 gauge), and it was then fitted onto a syringe-pump. The THF solution of *N*-chloroamine was added dropwise to the reaction (vial **A**) over 1 h in dark, and the reaction was stirred at 40 °C for 2 h. After cooling to room temperature, the reaction was quenched by 30% aqueous ammonia (2 mL) and was extracted by EtOAc (5 mL). The organic layer was collected, and the aqueous layer was washed with EtOAc (5 mL x 2). The combined organic fractions were dried over Na<sub>2</sub>SO<sub>4</sub> and then filtered through a short plug of Celite®. Solvents were removed by rotary evaporation, and the residue was re-dissolved in a small amount of dichloromethane (DCM). The dissolved mixture was subjected to flash column chromatography with silica gel as the column stationary phase / preparative TLC for isolation by a gradient elution with hexane/DCM.

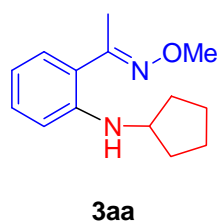

**3aa** was isolated as a yellowish green oil (37.1 mg, 80%) by flash column chromatography followed by high vacuum evacuation overnight (0.5 mmHg, ~18 h, for removal of **1a** residue). *R*<sub>f</sub> = 0.2 (2% Et<sub>2</sub>O in hexanes); <sup>1</sup>H NMR (CDCl<sub>3</sub>, 400 MHz): δ<sub>H</sub> 7.87 (bs, 1H), 7.38 (dd, *J* = 8.0 Hz, 1.2 Hz, 1H), 7.20 (td, *J* = 8.0 Hz, 1.6 Hz, 1H), 6.72 (d, *J* = 8.4 Hz, 1H), 6.64 (t, *J* = 8.0 Hz, 1H), 3.98 (s, 3H), 3.90 (bs, 1H), 2.30 (s, 3H), 2.04-2.01 (m, 2H), 1.79-1.77 (m, 2H), 1.68-1.60 (m, 4H); <sup>13</sup>C NMR (CDCl<sub>3</sub>, 100 MHz) δ<sub>C</sub> 157.48 (C), 146.72 (C), 129.70 (CH), 128.96 (CH), 116.87 (C), 114.40 (CH), 111.55 (CH), 61.74 (CH<sub>3</sub>), 53.99 (CH), 33.46 (CH<sub>2</sub>), 23.99 (CH<sub>2</sub>), 12.76 (CH<sub>3</sub>); IR (thin-film, cm<sup>-1</sup>): 3293, 2955, 2869, 1734, 1604, 1568, 1521, 1453, 1337, 1272, 1184, 1052, 900, 743; HRMS *m/z* (ESI): calculated for C<sub>14</sub>H<sub>21</sub>N<sub>2</sub>O<sup>+</sup>: 233.1654, found: 233.1647.

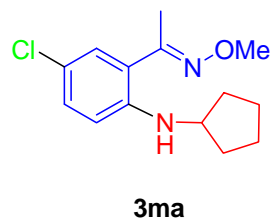

**3ma** was isolated as a lightly brown oil (23.4 mg, 44%) by flash column chromatography followed by high vacuum evacuation overnight (0.5 mmHg, ~18 h, for removal of **1m** residue) *R*<sub>f</sub> = 0.3 (2% Et<sub>2</sub>O in hexanes); <sup>1</sup>H NMR (CDCl<sub>3</sub>, 400 MHz): δ<sub>H</sub> 7.88 (bs, 1H), 7.31 (d, *J* = 2.4 Hz, 1H), 7.12 (dd, *J* = 9.2 Hz, 2.4 Hz, 1H), 6.64 (d, *J* = 9.4 Hz, 1H), 3.97 (s, 3H), 3.84 (bs, 1H), 2.25 (s, 3H), 2.03-1.98 (m, 2H), 1.76-1.74 (m, 2H), 1.67-1.64 (m, 2H), 1.60-1.56 (m, 2H); <sup>13</sup>C NMR (CDCl<sub>3</sub>, 100 MHz) δ<sub>C</sub> 156.54 (C), 145.25 (C), 129.32 (CH), 128.41 (CH), 119.04 (C), 118.01 (C), 112.76 (CH), 61.88 (CH<sub>3</sub>), 54.13 (CH), 33.33 (CH<sub>2</sub>), 23.95 (CH<sub>2</sub>), 12.67 (CH<sub>3</sub>); IR (thin-film, cm<sup>-1</sup>): 3290, 2956, 2869, 1735, 1600, 1566, 1512, 1449, 1409, 1325, 1262, 1183, 1040, 913, 804; HRMS *m/z* (ESI): calculated for C<sub>14</sub>H<sub>20</sub>N<sub>2</sub>OCl<sup>+</sup>: 267.1264, found: 267.1266.

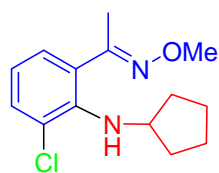

**3ma'**

**3ma'** was isolated as a light brown oil (5.4 mg, 10% yield) (*chlorination product of 3aa*) by flash column chromatography.  $R_f = 0.1$  (2% Et<sub>2</sub>O in hexanes); <sup>1</sup>H NMR (CDCl<sub>3</sub>, 400 MHz):  $\delta_H$  7.29 (dd,  $J = 8.0$  Hz, 1.2 Hz, 1H), 7.15 (dd,  $J = 7.6$  Hz, 1.2 Hz, 1H), 6.82 (t,  $J = 8.0$  Hz, 1H), ~5.3 (bs, 1H), 3.98 (s, 3H), 3.89-3.84 (m, 1H), 2.20 (s, 3H), 1.80-1.77 (m, 2H), 1.70-1.66 (m, 2H), 1.58-1.54 (m, 2H), 1.46-1.44 (m, 2H); <sup>13</sup>C NMR (CDCl<sub>3</sub>, 100 MHz)  $\delta_C$  156.75 (C), 143.18 (C), 130.04 (CH), 128.66 (C), 128.38 (CH), 125.70 (C), 120.43 (CH), 61.82 (CH<sub>3</sub>), 58.96 (CH), 33.39 (CH<sub>2</sub>), 23.36 (CH<sub>2</sub>), 14.48 (CH<sub>3</sub>); IR (thin-film, cm<sup>-1</sup>): 3360, 3313, 2957, 2870, 1592, 1453, 1439, 1253, 1079, 1048, 891, 779, 743; HRMS  $m/z$  (ESI): calculated for C<sub>14</sub>H<sub>20</sub>N<sub>2</sub>OCl<sup>+</sup>: 267.1264, found: 267.1262.

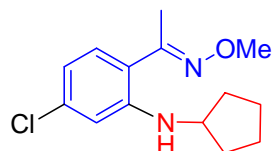

**3ba**

**3ba** was synthesized using the general procedure with 1.0 equiv of CsOAc and it was isolated as a light brown oil (40.5 mg, 76% yield) (with 1.3 equiv of CsOAc, <sup>1</sup>H NMR yield = 48%) by preparative TLC.  $R_f = 0.4$  (10% DCM in hexanes); <sup>1</sup>H NMR (CDCl<sub>3</sub>, 400 MHz):  $\delta_H$  8.13 (bs, 1H), 7.27 (d,  $J = 8.4$  Hz, 1H), 6.69 (d,  $J = 1.6$  Hz, 1H), 6.59 (dd,  $J = 8.4$  Hz, 2 Hz, 1H), 3.96 (s, 3H), 3.86-3.82 (bm, 1H), 2.25 (s, 3H), 2.06-1.99 (m, 2H), 1.78-1.75 (m, 2H), 1.68-1.64 (m, 2H), 1.62-1.59 (m, 2H); <sup>13</sup>C NMR (CDCl<sub>3</sub>, 100 MHz)  $\delta_C$  156.85 (C), 147.45 (C), 135.62 (C), 130.02 (CH), 115.48 (C), 114.50 (CH), 111.22 (CH), 61.82 (CH<sub>3</sub>), 54.11 (CH), 33.24 (CH<sub>2</sub>), 23.91 (CH<sub>2</sub>), 12.69 (CH<sub>3</sub>); IR (thin-film, cm<sup>-1</sup>): 3289, 2957, 2869, 1600, 1512, 1409, 1325, 1262, 1183, 1046, 913, 804; HRMS  $m/z$  (ESI): calculated for C<sub>14</sub>H<sub>20</sub>N<sub>2</sub>OCl<sup>+</sup>: 267.1264, found: 267.1257.

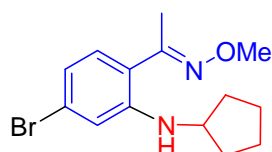

**3ca**

**3ca** was synthesized using the general procedure with 1.0 equiv of CsOAc and it was isolated as a light brown oil (48.5 mg, 78% yield) (with 1.3 equiv of CsOAc, <sup>1</sup>H NMR yield = 52%) by preparative TLC.  $R_f = 0.4$  (10% DCM in hexanes); <sup>1</sup>H NMR (CDCl<sub>3</sub>, 400 MHz):  $\delta_H$  8.08 (bs, 1H), 7.19 (d,  $J = 8.4$  Hz, 1H), 6.83 (d,  $J = 2$  Hz, 1H), 6.72 (dd,  $J = 8.4$  Hz, 1.6 Hz, 1H), 3.96 (s, 3H), 3.83-3.82 (bm, 1H), 2.24 (s, 3H), 2.05-2.00 (m, 2H), 1.76-1.75 (m, 2H), 1.68-1.65 (m, 2H), 1.61-1.56 (m, 2H); <sup>13</sup>C NMR (CDCl<sub>3</sub>, 100 MHz)  $\delta_C$  156.93 (C), 147.57 (C), 130.19 (CH), 124.15 (C), 117.34 (CH), 115.80 (C), 114.13 (CH), 61.84 (CH<sub>3</sub>), 54.05 (CH), 33.25 (CH<sub>2</sub>), 23.91 (CH<sub>2</sub>), 12.66 (CH<sub>3</sub>); IR (thin-film, cm<sup>-1</sup>): 3275, 2956, 2869, 1597, 1563, 1509, 1425, 1273, 1061, 1044, 905; HRMS  $m/z$  (ESI): calculated for C<sub>14</sub>H<sub>20</sub>N<sub>2</sub>OBr<sup>+</sup>: 311.0759, found: 311.0763.

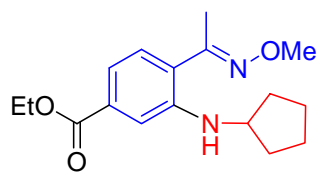

**3da**

**3da** was synthesized using the general procedure with 1.0 equiv of CsOAc and it was isolated as a brown oil (49.2 mg, 81% yield) (with 1.3 equiv of CsOAc, <sup>1</sup>H NMR yield = 43%) by preparative TLC.  $R_f = 0.55$  (50% DCM in hexane); <sup>1</sup>H NMR (CDCl<sub>3</sub>, 400 MHz):  $\delta_H$  7.95 (bs, 1H), 7.41-7.39 (m, 2H), 7.257 (dd,  $J = 8.4$  Hz, 1.2 Hz, 1H), 4.36 (q,  $J = 7.2$  Hz, 2H), 3.99-3.97 (m, 4H), 2.23 (s, 3H), 2.09-2.05 (m, 2H), 1.77-1.75 (m, 2H), 1.69-1.65 (m, 2H), 1.60-1.56 (m, 2H), 1.39 (t,  $J = 7.2$  Hz, 3H); <sup>13</sup>C NMR (CDCl<sub>3</sub>, 100 MHz)  $\delta_C$  166.86 (C), 156.97 (C), 146.43 (C), 131.05 (C), 128.77 (CH), 120.47 (C), 115.20 (CH), 112.65 (CH), 61.91 (CH<sub>3</sub>), 60.75 (CH<sub>2</sub>), 54.08 (CH), 33.39 (CH<sub>2</sub>), 23.96 (CH<sub>2</sub>), 14.24 (CH<sub>3</sub>), 12.76 (CH<sub>3</sub>); IR (thin-film, cm<sup>-1</sup>): 3294, 2957, 2870, 1716, 1597, 1561, 1435, 1306, 1248, 1111, 1045, 901, 763; HRMS  $m/z$  (ESI): calculated for C<sub>17</sub>H<sub>25</sub>N<sub>2</sub>O<sub>3</sub><sup>+</sup>: 305.1865, found: 305.1852.

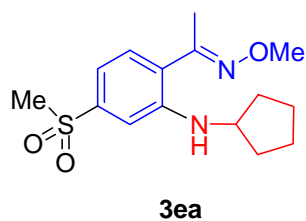

**3ea** was synthesized using the general procedure with 1.0 equiv of CsOAc and it was isolated as a yellow oil (47.7 mg, 77% yield) (with 1.3 equiv of CsOAc,  $^1\text{H}$  NMR yield = 32%) by preparative TLC (30% EtOAc in hexane) followed by flash column chromatography (30% hexane in DCM).  $R_f$  = 0.5 (10% hexane in DCM);  $^1\text{H}$  NMR ( $\text{CDCl}_3$ , 400 MHz):  $\delta_H$  8.22 (bs, 1H), 7.50 (d,  $J$  = 8.4 Hz, 1H), 7.20 (s, 1H), 7.10 (d,  $J$  = 8.0 Hz, 1H), 4.00 (s, 3H), 3.94-3.92 (bm, 1H), 3.04 (s, 3H), 2.29 (s, 3H), 2.09-2.04 (m, 2H), 1.78-1.68 (m, 4H), 1.59-1.55 (m, 2H);  $^{13}\text{C}$  NMR ( $\text{CDCl}_3$ , 100 MHz)  $\delta_C$  156.48 (C), 146.91 (C), 140.75 (C), 129.79 (CH), 120.86 (C), 112.05 (CH), 109.59 (CH), 62.11 ( $\text{CH}_3$ ), 54.07 (CH), 44.31 ( $\text{CH}_3$ ), 33.21 ( $\text{CH}_2$ ), 23.85 ( $\text{CH}_2$ ), 12.88 ( $\text{CH}_3$ ); IR (thin-film,  $\text{cm}^{-1}$ ): 3280, 2957, 2870, 1597, 1561, 1517, 1429, 1310, 1279, 1154, 1058, 1043, 899, 760, 546; HRMS  $m/z$  (ESI): calculated for  $\text{C}_{15}\text{H}_{23}\text{N}_2\text{O}_3\text{S}^+$ : 311.1429, found: 311.1417.

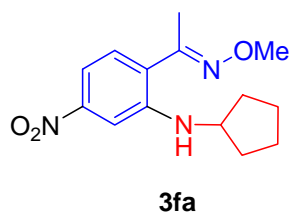

**3fa** was synthesized using the general procedure with 1.0 equiv of CsOAc and it was isolated as an orange solid (50.9 mg, 92% yield) (with 1.3 equiv of CsOAc,  $^1\text{H}$  NMR yield = 23%) by flash column chromatography.  $R_f$  = 0.25 (20% DCM in hexanes); mp = 99.0-100.5 °C;  $^1\text{H}$  NMR ( $\text{CDCl}_3$ , 400 MHz):  $\delta_H$  8.25 (bs, 1H), 7.51 (d,  $J$  = 2.0 Hz, 1H), 7.47 (d,  $J$  = 8.8 Hz, 1H), 7.41 (dd,  $J$  = 8.8 Hz, 2.0 Hz, 1H), 4.01 (s, 3H), 3.95-3.92 (bm, 1H), 2.30 (s, 3H), 2.12-2.07 (m, 2H), 1.80-1.68 (m, 4H), 1.62-1.59 (m, 2H);  $^{13}\text{C}$  NMR ( $\text{CDCl}_3$ , 100 MHz)  $\delta_C$  156.38 (C), 148.45 (C), 147.01 (C), 129.47 (CH), 121.83 (C), 108.71 (CH), 105.79 (CH), 61.18 ( $\text{CH}_3$ ), 54.19 (CH), 33.20 ( $\text{CH}_2$ ), 23.91 ( $\text{CH}_2$ ), 12.92 ( $\text{CH}_3$ ); IR (KBr,  $\text{cm}^{-1}$ ): 3256, 2956, 2934, 1621, 1527, 1505, 1434, 1342, 1284, 1056, 1042, 907; HRMS  $m/z$  (ESI): calculated for  $\text{C}_{14}\text{H}_{20}\text{N}_3\text{O}_3^+$ : 278.1505, found: 278.1495.

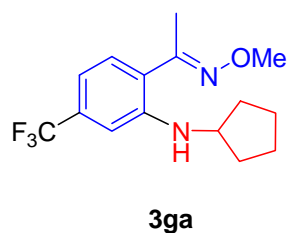

**3ga** was synthesized using the general procedure with 1.0 equiv of CsOAc and it was isolated as a pale yellow oil (48.6 mg, 81% yield) (with 1.3 equiv of CsOAc,  $^1\text{H}$  NMR yield = 28%) by preparative TLC.  $R_f$  = 0.4 (10% DCM in hexanes);  $^1\text{H}$  NMR ( $\text{CDCl}_3$ , 400 MHz):  $\delta_H$  8.10 (bs, 1H), 7.44 (d,  $J$  = 8.4 Hz, 1H), 6.90 (s, 1H), 6.84 (d,  $J$  = 8.0 Hz, 1H), 4.00 (s, 3H), 3.91 (bs, 1H), 2.29 (s, 3H), 2.08-2.03 (m, 2H), 1.78-1.69 (m, 4H), 1.62-1.58 (m, 2H);  $^{13}\text{C}$  NMR ( $\text{CDCl}_3$ , 100 MHz)  $\delta_C$  156.72 (C), 146.62 (C), 131.72, 131.41, 131.09, 130.77 (q,  $J$  = 31 Hz, C), 129.26 (CH), 128.35, 125.61, 122.90, 120.24 (q,  $J$  = 266 Hz, C), 110.54, 110.50, 110.46, 110.43 (q,  $J$  = 4 Hz, CH), 107.93, 107.89, 107.85, 107.81 (q,  $J$  = 4 Hz, CH), 61.94 ( $\text{CH}_3$ ), 53.97 (CH), 33.28 ( $\text{CH}_2$ ), 23.91 ( $\text{CH}_2$ ), 12.75 ( $\text{CH}_3$ ); IR (thin-film,  $\text{cm}^{-1}$ ): 3285, 2959, 2872, 1619, 1600, 1569, 1535, 1444, 1338, 1278, 1168, 1123, 1097, 1060, 1045, 923, 853, 803; HRMS  $m/z$  (ESI): calculated for  $\text{C}_{15}\text{H}_{20}\text{N}_2\text{OF}_3^+$ : 301.1528, found: 301.1540.

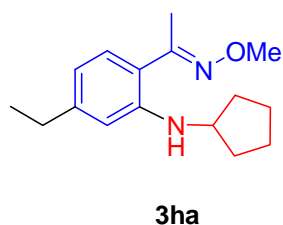

**3ha** was isolated as a pale yellow oil (33.3 mg, 64% yield) by flash column chromatography.  $R_f$  = 0.15 (10% DCM in hexanes);  $^1\text{H}$  NMR ( $\text{CDCl}_3$ , 400 MHz):  $\delta_H$  7.88(bs, 1H), 7.30 (d,  $J$  = 8.0 Hz, 1H), 6.56-6.51 (bm, 2H), 3.95 (s, 3H), 3.93-3.89 (m, 1H), 2.60 (q,  $J$  = 7.6 Hz, 2H), 2.27 (s, 3H), 2.04-2.00 (m, 2H), 1.78-1.76 (m, 2H), 1.67-1.64 (m, 4H), 1.24 (t,  $J$  = 7.6 Hz, 3H);  $^{13}\text{C}$  NMR ( $\text{CDCl}_3$ , 100 MHz)  $\delta_C$  157.38 (C), 146.19 (C), 128.99 (CH), 114.27 (C), 110.91 (C), 61.68 ( $\text{CH}_3$ ), 54.07 (CH), 33.39 ( $\text{CH}_2$ ), 29.03 ( $\text{CH}_2$ ), 23.95 ( $\text{CH}_2$ ), 15.32 ( $\text{CH}_3$ ), 12.67 ( $\text{CH}_3$ ) (2 CH signals missing); IR (thin-film,  $\text{cm}^{-1}$ ): 3292, 2959, 2869, 1612, 1596, 1562, 1438, 1274, 1062, 1045, 894; HRMS  $m/z$  (ESI): calculated for  $\text{C}_{16}\text{H}_{25}\text{N}_2\text{O}^+$ : 261.1955, found: 261.1967.

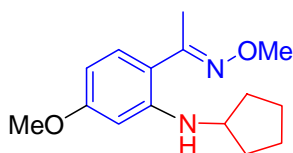

**3ia**

**3ia** was isolated as a brown oil (18.8 mg, 36% yield) by flash column chromatography.  $R_f = 0.2$  (20% DCM in hexanes);  $^1\text{H}$  NMR ( $\text{CDCl}_3$ , 400 MHz):  $\delta_H$  8.10 (bs, 1H), 7.30 (d,  $J = 8.4$  Hz, 1H), 6.23-6.21 (m, 2H), 3.94 (s, 3H), 3.84-3.81 (m, 4H), 2.25 (s, 3H), 2.04-2.00 (m, 2H), 1.78-1.77 (m, 2H), 1.67-1.58 (m, 4H);  $^{13}\text{C}$  NMR ( $\text{CDCl}_3$ , 100 MHz)  $\delta_C$  160.95 (C), 157.18 (C), 130.36 (CH), 61.61 ( $\text{CH}_3$ ), 55.01 ( $\text{CH}_3$ ), 54.28 (CH), 33.24 ( $\text{CH}_2$ ), 23.98 ( $\text{CH}_2$ ), 12.62 ( $\text{CH}_3$ ) (2 CH, 2 C signals missing); IR (thin-film,  $\text{cm}^{-1}$ ): 3285, 2954, 2869, 1613, 1567, 1528, 1463, 1288, 1222, 1050, 894; HRMS  $m/z$  (ESI): calculated for  $\text{C}_{15}\text{H}_{23}\text{N}_2\text{O}_2^+$ : 263.1760, found: 263.1748.

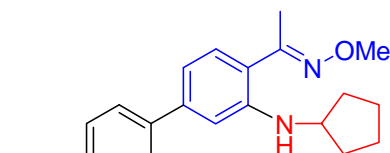

**3ja**

**3ja** was isolated as a light brown solid (33.1 mg, 49% yield) by flash column chromatography.  $R_f = 0.3$  (30% DCM in hexanes); mp = 73.2-75.0 °C;  $^1\text{H}$  NMR ( $\text{CDCl}_3$ , 400 MHz):  $\delta_H$  8.01 (bs, 1H), 7.56 (d,  $J = 8.8$  Hz, 2H), 7.43 (d,  $J = 8.0$  Hz, 1H), 6.98 (d,  $J = 8.4$  Hz, 2H), 6.90-6.83 (bm, 2H), 3.99 (m, 4H), 3.86 (s, 3H), 2.31 (s, 3H), 2.07-2.06 (bm, 2H), 1.80 (bs, 2H), 1.67 (bs, 4H);  $^{13}\text{C}$  NMR ( $\text{CDCl}_3$ , 100 MHz)  $\delta_C$  159.23 (C), 157.28 (C), 142.01 (C), 133.90 (C), 129.38 (CH), 128.11 (2CH), 114.04 (2CH), 113.48 (C), 109.73 (C), 61.78 ( $\text{CH}_3$ ), 55.29 ( $\text{CH}_3$ ), 54.13 (CH), 33.41 ( $\text{CH}_2$ ), 24.01 ( $\text{CH}_2$ ), 12.70 ( $\text{CH}_3$ ) (2 CH signals missing); IR (KBr,  $\text{cm}^{-1}$ ): 3268, 2952, 2933, 1594, 1556, 1506, 1436, 1285, 1246, 1179, 1049, 1027, 912, 827; HRMS  $m/z$  (ESI): calculated for  $\text{C}_{21}\text{H}_{27}\text{N}_2\text{O}_2^+$ : 339.2073, found: 339.2074.

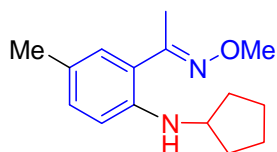

**3ka**

**3ka** was isolated as a light brown oil (27.0 mg, 55% yield) by flash column chromatography followed by high vacuum evacuation overnight (0.5 mmHg, ~18 h, for removal of **1k** residue).  $R_f = 0.2$  (2%  $\text{Et}_2\text{O}$  in hexanes);  $^1\text{H}$  NMR ( $\text{CDCl}_3$ , 400 MHz):  $\delta_H$  7.58 (bs, 1H), 7.17 (s, 1H), 7.02 (d,  $J = 8.0$  Hz, 1H), 6.68 (bs, 1H), 3.96 (s, 3H), 3.86-3.85 (bm, 1H), 2.27 (s, 3H), 2.26 (s, 3H), 2.02-1.96 (m, 2H), 1.77-1.74 (bm, 2H), 1.66-1.60 (m, 4H);  $^{13}\text{C}$  NMR ( $\text{CDCl}_3$ , 100 MHz)  $\delta_C$  157.29 (C), 130.45 (CH), 129.27 (CH), 112.59 (bs, C), 61.76 ( $\text{CH}_3$ ), 54.48 (bs, CH), 33.25 ( $\text{CH}_2$ ), 23.95 ( $\text{CH}_2$ ), 20.42 ( $\text{CH}_3$ ), 12.87 ( $\text{CH}_3$ ) (1 CH, 2 C signals missing); IR (thin-film,  $\text{cm}^{-1}$ ): 3300, 2954, 2868, 1620, 1521, 1325, 1273, 1182, 1047, 925, 879, 805; HRMS  $m/z$  (ESI): calculated for  $\text{C}_{15}\text{H}_{23}\text{N}_2\text{O}^+$ : 247.1810, found: 247.1800.

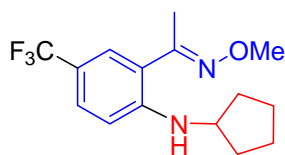

**3la**

**3la** was synthesized using the general procedure with 1.0 equiv of  $\text{CsOAc}$  and it was isolated as a light brown oil (46.8 mg, 78% yield) (with 1.3 equiv of  $\text{CsOAc}$ ,  $^1\text{H}$  NMR yield = 46%) by preparative TLC.  $R_f = 0.45$  (10% DCM in hexanes);  $^1\text{H}$  NMR ( $\text{CDCl}_3$ , 400 MHz):  $\delta_H$  8.37 (bs, 1H), 7.59 (s, 1H), 7.39 (d,  $J = 8.8$  Hz, 1H), 6.73 (d,  $J = 8.8$  Hz, 1H), 3.99 (s, 3H), 3.92-3.91 (bm, 1H), 2.31 (s, 3H), 2.06-2.02 (m, 2H), 1.78-1.76 (m, 2H), 1.70-1.66 (m, 2H), 1.64-1.59 (m, 2H);  $^{13}\text{C}$  NMR ( $\text{CDCl}_3$ , 100 MHz)  $\delta_C$  156.82 (C), 148.81 (C), 129.08, ~126.4, 123.71, 121.03 (q,  $J = 268$  Hz, C), 126.49-126.37 (m, CH), 126.23, 126.19, 126.15, 126.11 (q,  $J = 4$  Hz, CH), 116.37, 116.06, 115.73, 115.40 (q,  $J = 33$  Hz, C), 116.06 (C), 111.01 (CH), 61.89 ( $\text{CH}_3$ ), 53.96 (CH), 33.28 ( $\text{CH}_2$ ), 23.91 ( $\text{CH}_2$ ), 12.52 ( $\text{CH}_3$ ); IR (thin-film,  $\text{cm}^{-1}$ ): 3273, 2959, 2873, 1619, 1599, 1535, 1337, 1317, 1269, 1108, 1047, 898, 814, 647; HRMS  $m/z$  (ESI): calculated for  $\text{C}_{15}\text{H}_{20}\text{N}_2\text{OF}_3^+$ : 301.1528, found: 301.1519.



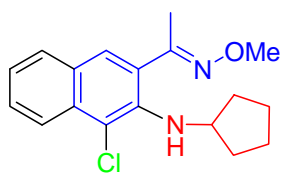

**3na-3Cl**

**3na-3Cl** was synthesized using the general procedure with 1.0 equiv of CsOAc and it was isolated as a brown oil (27.2 mg, 43% yield) by preparative TLC.  $R_f$  = 0.2 (20% DCM in hexanes);  $^1\text{H}$  NMR ( $\text{CDCl}_3$ , 400 MHz):  $\delta_H$  8.10 (d,  $J$  = 8.4 Hz, 1H), 7.74 (d,  $J$  = 8.0 Hz, 1H), 7.68 (s, 1H), 7.53 (t,  $J$  = 7.6 Hz, 1H), 7.35 (t,  $J$  = 7.6 Hz, 1H), 4.81 (bs, 1H), 4.03 (s, 3H), 3.90-3.85 (m, 1H), 2.28 (s, 3H), 1.84-1.78 (m, 2H), 1.74-1.71 (m, 2H), 1.59-1.57 (m, 2H), 1.49-1.45 (m, 2H);  $^{13}\text{C}$  NMR ( $\text{CDCl}_3$ , 100 MHz)  $\delta_C$  157.23 (C), 140.87 (C), 131.41 (C), 129.70 (C), 128.89 (C), 128.39 (CH), 128.34 (CH), 127.72 (CH), 124.11 (CH), 123.15 (CH), 119.71 (C), 61.88 ( $\text{CH}_3$ ), 59.32 (CH), 33.46 ( $\text{CH}_2$ ), 23.44 ( $\text{CH}_2$ ), 14.73 ( $\text{CH}_3$ ); IR (thin-film,  $\text{cm}^{-1}$ ): 3358, 2858, 2870, 1625, 1473, 1438, 1047, 884, 747; HRMS  $m/z$  (ESI): calculated for  $\text{C}_{18}\text{H}_{22}\text{N}_2\text{OCl}^+$ : 317.1421, found: 317.1420.

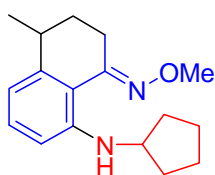

**3oa**

**3oa** was as a greenish brown semi-solid (32.6 mg, 60% yield) by preparative TLC.  $R_f$  = 0.6 (20% DCM in hexanes);  $^1\text{H}$  NMR ( $\text{CDCl}_3$ , 400 MHz):  $\delta_H$  8.37 (bs, 1H), 7.12 (t,  $J$  = 8.0 Hz, 1H), 6.59 (d,  $J$  = 8.0 Hz, 1H), 6.48 (d,  $J$  = 8 Hz, 1H), 3.97 (s, 3H), 3.89 (bs, 1H), 2.91-2.80 (m, 3H), 2.04-2.01 (m, 2H), 1.87-1.82 (m, 1H), 1.78 (bs, 2H), 1.67-1.62 (m, 5H), 1.24 (d,  $J$  = 7.2 Hz, 3H);  $^{13}\text{C}$  NMR ( $\text{CDCl}_3$ , 100 MHz)  $\delta_C$  158.26 (C), 147.39 (C), 146.63 (C), 129.68 (CH), 113.81 (CH), 110.93 (CH), 109.44 (C), 61.75 ( $\text{CH}_3$ ), 54.11 (CH), 34.06 (CH), 33.51 ( $\text{CH}_2$ ), 33.48 ( $\text{CH}_3$ ), 27.53 ( $\text{CH}_2$ ), 24.02 ( $\text{CH}_2$ ), 21.63 ( $\text{CH}_2$ ), 20.67 ( $\text{CH}_3$ ); IR (thin-film,  $\text{cm}^{-1}$ ): 3277, 2956, 2866, 1593, 1519, 1464, 1335, 1181, 1053, 900, 790, 741; HRMS  $m/z$  (ESI): calculated for  $\text{C}_{17}\text{H}_{25}\text{N}_2\text{O}^+$ : 273.1967, found: 273.1955.

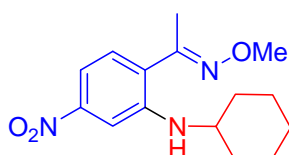

**3fb**

**3fb** was synthesized using the general procedure with 1.1 equiv of CsOAc and it was isolated as an orange solid (50.0 mg, 86% yield) by preparative TLC.  $R_f$  = 0.35 (30% DCM in hexanes); mp = 98.2-99.0 °C;  $^1\text{H}$  NMR ( $\text{CDCl}_3$ , 400 MHz):  $\delta_H$  8.20 (bs, 1H), 7.48-7.45 (m, 2H), 7.38 (dd,  $J$  = 8.8 Hz, 2.0 Hz, 1H), 4.02 (s, 3H), 3.50 (bs, 1H), 2.30 (s, 3H), 2.06-2.03 (m, 2H), 1.78-1.74 (m, 2H), 1.66-1.62 (m, 1H), 1.52-1.46 (m, 2H), 1.44-1.35 (m, 3H);  $^{13}\text{C}$  NMR ( $\text{CDCl}_3$ , 100 MHz)  $\delta_C$  156.44 (C), 148.55 (C), 146.51 (C), 129.66 (CH), 121.80 (C), 108.52 (CH), 105.46 (CH), 62.22 ( $\text{CH}_3$ ), 50.81 (CH), 32.42 ( $\text{CH}_2$ ), 25.77 ( $\text{CH}_2$ ), 24.25 ( $\text{CH}_2$ ), 13.01 ( $\text{CH}_3$ ); IR (KBr,  $\text{cm}^{-1}$ ): 3269, 2930, 2856, 1621, 1531, 1510, 1342, 1283, 1058, 1043, 903, 857; HRMS  $m/z$  (ESI): calculated for  $\text{C}_{15}\text{H}_{22}\text{N}_3\text{O}_3^+$ : 292.1661, found: 292.1653.

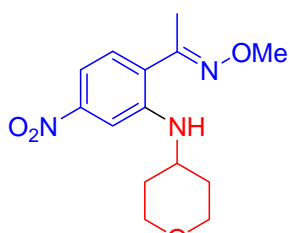

**3fc**

**3fc** was synthesized using the general procedure with 1.1 equiv of CsOAc and it was isolated as an orange solid (38.7 mg, 66% yield) by flash column chromatography.  $R_f$  = 0.2 (50% DCM in hexanes); mp = 151.5-153.5 °C  $^1\text{H}$  NMR ( $\text{CDCl}_3$ , 400 MHz):  $\delta_H$  8.29 (bd,  $J$  = 6.0 Hz, 1H), 7.50-7.48 (m, 2H), 7.43 (d,  $J$  = 8.4 Hz, 1H), 4.02-3.97 (m, 5H), 3.73-3.72 (bm, 1H), 3.62 (t,  $J$  = 10 Hz, 2H), 2.31 (s, 3H), 2.12-2.09 (m, 2H), 1.65-1.57 (m, 2H);  $^{13}\text{C}$  NMR ( $\text{CDCl}_3$ , 100 MHz)  $\delta_C$  156.47 (C), 148.51 (C), 146.20 (C), 129.80 (CH), 122.13 (C), 109.14 (CH), 105.23 (CH), 66.20 ( $\text{CH}_2$ ), 62.28 (CH), 48.08 ( $\text{CH}_3$ ), 32.65 ( $\text{CH}_2$ ), 13.03 ( $\text{CH}_3$ ); IR (KBr,  $\text{cm}^{-1}$ ): 3225, 2937, 2861, 1531, 1504, 1434, 1340, 1135, 1035, 909, 859, 824; HRMS  $m/z$  (ESI): calculated for  $\text{C}_{14}\text{H}_{19}\text{N}_3\text{O}_4^+$ : 294.1454, found: 294.1455.

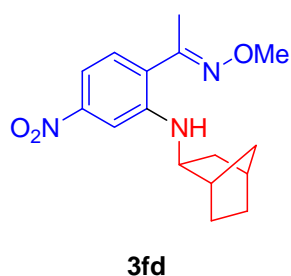

**3fd** was synthesized using the general procedure with 1.1 equiv of CsOAc and it was isolated as an orange gum (45.6 mg, 75% yield) by preparative TLC.  $R_f = 0.3$  (20% DCM in hexanes);  $^1\text{H}$  NMR ( $\text{CDCl}_3$ , 400 MHz):  $\delta_H$  8.18 (bd,  $J = 4.0$  Hz, 1H), 7.47-7.39 (m, 3H), 4.01 (s, 3H), 3.39 (bs, 1H), 2.35-1.96 (m, 5H), 1.93-1.91 (m, 1H), 1.64-1.52 (m, 3H), 1.32-1.25 (m, 4H);  $^{13}\text{C}$  NMR ( $\text{CDCl}_3$ , 100 MHz)  $\delta_C$  156.36 (C), 148.44 (C), 146.59 (C), 129.44 (CH), 121.76 (C), 108.65 (CH), 105.61 (CH), 62.20 (CH), 56.15 (CH), 41.49 ( $\text{CH}_3$ ), 40.90 ( $\text{CH}_2$ ), 35.74 (CH), 35.68 ( $\text{CH}_2$ ), 28.39 ( $\text{CH}_2$ ), 26.30 ( $\text{CH}_2$ ), 12.87 ( $\text{CH}_3$ ); IR (thin-film,  $\text{cm}^{-1}$ ): 3281, 2953, 2870, 1618, 1538, 1434, 1345, 1284, 1060, 1044, 904, 857, 818, 742; HRMS  $m/z$  (ESI): calculated for  $\text{C}_{16}\text{H}_{22}\text{N}_3\text{O}_3^+$ : 304.1661, found: 304.1667.

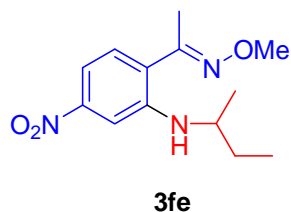

**3fe** was synthesized using the general procedure with 1.1 equiv of CsOAc and it was isolated as an orange solid (45.1 mg, 85% yield) by preparative TLC.  $R_f = 0.35$  (30% DCM in hexanes); mp = 62.8-64.5 °C;  $^1\text{H}$  NMR ( $\text{CDCl}_3$ , 400 MHz):  $\delta_H$  8.14 (bs, 1H), 7.48-7.45 (m, 2H), 7.39 (dd,  $J = 8.8$  Hz, 2.0 Hz, 1H), 4.01 (s, 3H), 3.62-3.57 (m, 1H), 2.31 (s, 3H), 1.69-1.60 (m, 2H), 1.26 (d,  $J = 6.4$  Hz, 3H) 1.01 (t,  $J = 7.6$  Hz, 2H);  $^{13}\text{C}$  NMR ( $\text{CDCl}_3$ , 100 MHz)  $\delta_C$  156.42 (C), 148.56 (C), 146.84 (C), 129.63 (CH), 121.87 (C), 108.56 (CH), 105.44 (CH), 62.16 ( $\text{CH}_3$ ), 49.55 (CH), 29.26 ( $\text{CH}_2$ ), 19.75 ( $\text{CH}_3$ ), 12.99 ( $\text{CH}_3$ ) 10.10 ( $\text{CH}_3$ ); IR (KBr,  $\text{cm}^{-1}$ ): 3251, 2963, 2930, 1621, 1531, 1506, 1436, 1342, 1283, 1062, 1045, 901, 863, 819; HRMS  $m/z$  (ESI): calculated for  $\text{C}_{13}\text{H}_{20}\text{N}_3\text{O}_3^+$ : 266.1513, found: 266.1505.

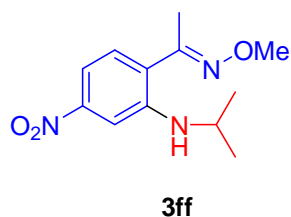

**3ff** was synthesized using the general procedure with 1.0 equiv of CsOAc and it was isolated as an orange solid (42.2 mg, 84% yield) by flash column chromatography.  $R_f = 0.4$  (30% DCM in hexanes); mp = 79.5-81.5 °C;  $^1\text{H}$  NMR ( $\text{CDCl}_3$ , 400 MHz):  $\delta_H$  8.12 (bs, 1H), 7.47-7.45 (m, 2H), 7.40 (d,  $J = 8.8$  Hz, 1H), 4.02 (s, 3H), 3.79-3.76 (bm, 1H), 2.30 (s, 3H), 1.30 (d,  $J = 6.4$  Hz, 2H);  $^{13}\text{C}$  NMR ( $\text{CDCl}_3$ , 100 MHz)  $\delta_C$  156.34 (C), 148.54 (C), 146.59 (C), 129.62 (CH), 121.83 (C), 108.63 (CH), 105.43 (CH), 62.17 ( $\text{CH}_3$ ), 43.96 (CH), 22.52 ( $\text{CH}_3$ ), 13.01 ( $\text{CH}_3$ ); IR (KBr,  $\text{cm}^{-1}$ ): 3255, 2977, 2966, 2928, 1621, 1536, 1512, 1436, 1342, 1284, 1060, 1044, 902; HRMS  $m/z$  (ESI): calculated for  $\text{C}_{12}\text{H}_{18}\text{N}_3\text{O}_3^+$ : 252.1348, found: 252.1336.

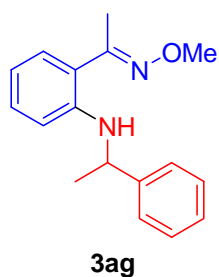

**3ag** was isolated as a yellow solid (35.4 mg, 66% yield) by flash column chromatography.  $R_f = 0.3$  (20% DCM in hexanes); mp = 71.0-72.4 °C;  $^1\text{H}$  NMR ( $\text{CDCl}_3$ , 400 MHz):  $\delta_H$  8.35 (bd,  $J = 3.2$ , 1H), 7.42-7.38 (m, 3H), 7.35-7.31 (m, 2H), 7.26-7.22 (m, 1H), 7.05 (t,  $J = 7.2$  Hz, 1H), 6.63 (t,  $J = 7.2$  Hz, 1H), 6.47 (d,  $J = 8.0$  Hz, 1H), 4.65-4.59 (m, 1H), 4.03 (s, 3H), 2.36 (s, 3H), 1.60 (d,  $J = 6.8$  Hz, 3H);  $^{13}\text{C}$  NMR ( $\text{CDCl}_3$ , 100 MHz)  $\delta_C$  157.62 (C), 146.15 (C), 145.40 (C), 129.67 (CH), 128.83 (CH), 128.56 (CH), 126.71 (CH), 125.79 (CH), 117.07 (C), 114.97 (CH), 112.22 (CH), 61.86 ( $\text{CH}_3$ ), 53.14 (CH), 24.98 ( $\text{CH}_3$ ), 12.85 ( $\text{CH}_3$ ); IR (KBr,  $\text{cm}^{-1}$ ): 3275, 2962, 2930, 1598, 1521, 1450, 1275, 1049, 1036, 899, 762, 740, 702; HRMS  $m/z$  (ESI): calculated for  $\text{C}_{17}\text{H}_{21}\text{N}_2\text{O}^+$ : 269.1654, found: 269.1653.



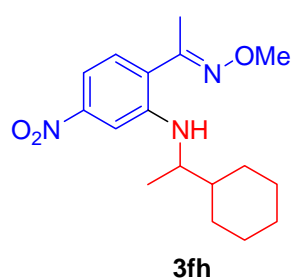

**3fh** was synthesized using the general procedure with 1.0 equiv of CsOAc and it was isolated as an orange oil (26.8 mg, 42% yield) by flash column chromatography.  $R_f = 0.4$  (30% DCM in hexanes);  $^1\text{H}$  NMR ( $\text{CDCl}_3$ , 400 MHz):  $\delta_H$  8.20 (bd,  $J = 6.4$  Hz, 1H), 7.47-7.45 (m, 2H), 7.37 (d,  $J = 8.4$  Hz, 1H), 4.01 (s, 3H), 3.53-3.49 (bm, 1H), 2.31 (s, 3H), 1.92-1.89 (m, 1H), 1.77-1.68 (m, 4H), 1.57-1.52 (m, 1H), 1.25-1.13 (m, 8H);  $^{13}\text{C}$  NMR ( $\text{CDCl}_3$ , 100 MHz)  $\delta_C$  156.62 (C), 148.62 (C), 147.16 (C), 129.69 (CH), 121.60 (C), 108.16 (CH), 105.15 (CH), 62.18 ( $\text{CH}_3$ ), 52.91 (CH), 43.28 (CH), 29.24 ( $\text{CH}_2$ ), 28.91 ( $\text{CH}_2$ ), 26.47 ( $\text{CH}_2$ ), 26.35 ( $\text{CH}_2$ ), 26.26 ( $\text{CH}_2$ ), 17.13 ( $\text{CH}_3$ ), 12.92 ( $\text{CH}_3$ ); IR (thin-film,  $\text{cm}^{-1}$ ): 3281, 2929, 2852, 1618, 1533, 1437, 1344, 1281, 1059, 1044, 906, 821; HRMS  $m/z$  (ESI): calculated for  $\text{C}_{17}\text{H}_{26}\text{N}_3\text{O}_3^+$ : 320.1974, found: 320.1976.

### 3. Amination Reactions with *N*-Chlorohexylamine and Characterizations

#### 3.1 Condition Examination for the Reaction with *N*-Chlorohexylamine

| <div><div><div>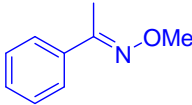<b>1a</b></div><div>+</div><div><div><b>2i<sup>c</sup></b></div><div><div><div><div><math>[\text{Cp}^*\text{RhCl}_2]_2</math> (5 mol%)</div><div>AgSbF<sub>6</sub> 1.5 equiv,</div><div>THF, 40 °C, 2 h</div></div></div><div><b>3ai</b> (X = H, Y = H)<br/><b>3ai-5Cl</b> (X = H, Y = Cl)<br/><b>3ai-3Cl</b>(X = Cl, Y = H)<br/><b>3ai-DiCl</b> (X = Cl, Y = Cl)</div></div></div></div></div> |               |                  |                      |                          |                          |                           |
|-----------------------------------------------------------------------------------------------------------------------------------------------------------------------------------------------------------------------------------------------------------------------------------------------------------------------------------------------------------------------------------------------------------------------------------------------------------------------------------------------------------------------------------------------------------------------------------------------------------------------------------------------------------------------|---------------|------------------|----------------------|--------------------------|--------------------------|---------------------------|
| entry                                                                                                                                                                                                                                                                                                                                                                                                                                                                                                                                                                                                                                                                 | CsOAc (equiv) | Additive (equiv) | yield%<br><b>3ai</b> | yield%<br><b>3ai-3Cl</b> | yield%<br><b>3ai-5Cl</b> | yield%<br><b>3ai-DiCl</b> |
| 1                                                                                                                                                                                                                                                                                                                                                                                                                                                                                                                                                                                                                                                                     | 1.3           | --               | --                   | --                       | trace                    | --                        |
| 2                                                                                                                                                                                                                                                                                                                                                                                                                                                                                                                                                                                                                                                                     | 0.3           | --               | trace                | 17                       | 20                       | trace                     |
| 3 <sup>d</sup>                                                                                                                                                                                                                                                                                                                                                                                                                                                                                                                                                                                                                                                        | --            | --               | trace                | (20) <sup>e</sup>        | (10)                     | (12%)                     |

<sup>a</sup>Reaction conditions: **1a** (0.2 mmol),  $[\text{Cp}^*\text{RhCl}_2]_2$  (5 mol%), AgSbF<sub>6</sub> (1.5 equiv), CsOAc, THF (1 mL) at 40 °C, 2 h, **2i** (2.2 equiv, in 1 mL THF) was added dropwise using a syringe pump at a rate of 2.2 equiv / h. <sup>b</sup>Yields were determined by  $^1\text{H}$  NMR. <sup>c</sup>**2i** were freshly prepared by stirring *N*-Chlorosuccinimide and *n*-hexylamine (1:1) in THF (1 mL) for 10 min. <sup>d</sup> $[\text{Cp}^*\text{Rh}(\text{OAc})_2]$  (10 mol%) was used instead. <sup>e</sup>Isolated yields in parentheses.

#### 3.2 Product Characterizations

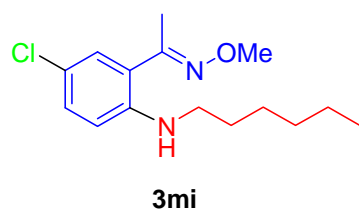

**3mi** was synthesized using the general procedure with **1a** as substrate,  $[\text{Cp}^*\text{Rh}(\text{OAc})_2]$  (10 mol%) and without CsOAc, and it was isolated as a white solid (9.6 mg, 17% yield) by flash column chromatography.  $R_f = 0.3$  (20% DCM in hexanes); mp = 52.0-53.5 °C;  $^1\text{H}$  NMR ( $\text{CDCl}_3$ , 400 MHz):  $\delta_H$  7.68 (bs, 1H), 7.32 (d,  $J = 2.4$  Hz, 1H), 7.13 (dd,  $J = 8.8$  Hz,

2.4 Hz, 1H), 7.59 (d,  $J = 8.8$  Hz, 1H), 3.98 (s, 3H), 3.17-3.12 (m, 2H), 2.26 (s, 3H), 1.68 (p,  $J = 7.2$  Hz, 2H), 1.48-1.44 (m, 2H), 1.36-1.32 (m, 4H), 0.90 (t,  $J = 6.8$  Hz, 3H);  $^{13}\text{C}$  NMR ( $\text{CDCl}_3$ , 100 MHz)  $\delta_{\text{C}}$  156.60 (C), 145.84 (C), 129.44 (CH), 128.35 (CH), 119.16 (C), 118.03 (C), 111.87 (CH), 61.92 ( $\text{CH}_3$ ), 43.37 ( $\text{CH}_2$ ), 31.57 ( $\text{CH}_2$ ), 29.01 ( $\text{CH}_2$ ), 26.97 ( $\text{CH}_2$ ), 22.57 ( $\text{CH}_2$ ), 13.96 ( $\text{CH}_3$ ), 12.73 ( $\text{CH}_3$ ); IR (KBr,  $\text{cm}^{-1}$ ): 3284, 2953, 2928, 2855, 1602, 1560, 1516, 1412, 1251, 1045, 916, 798; HRMS  $m/z$  (ESI): calculated for  $\text{C}_{15}\text{H}_{24}\text{N}_2\text{OCl}^+$ : 283.1577, found: 283.1579.

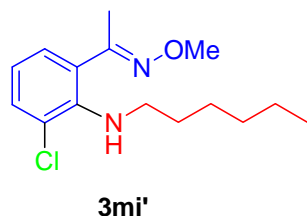

**3mi'** was synthesized using the general procedure with **1a** as substrate,  $[\text{Cp}^*\text{Rh}(\text{OAc})_2]$  (10 mol%) and without CsOAc, and it was isolated as an colourless oil (11.3 mg, 20% yield) by flash column chromatography.  $R_f = 0.1$  (20% DCM in hexanes);  $^1\text{H}$  NMR ( $\text{CDCl}_3$ , 400 MHz):  $\delta_{\text{H}}$  7.28 (dd,  $J = 8.0$  Hz, 1.6 Hz, 1H), 7.12 (dd,  $J = 8.0$  Hz, 1.6 Hz, 1H), 6.78 (t,  $J = 8.0$  Hz, 1H), 4.96 (bs, 1H), 3.98 (s, 3H), 3.09 (t,  $J = 7.2$  Hz, 2H), 2.19 (s, 3H), 1.52-1.49 (m, 2H), 1.34-1.25 (bm, 6H), 0.87 (t,  $J = 6.8$  Hz, 3H);  $^{13}\text{C}$  NMR ( $\text{CDCl}_3$ , 100 MHz)  $\delta_{\text{C}}$  156.66 (C), 144.02 (C), 129.99 (CH), 128.46 (CH), 127.75 (C), 124.90 (C), 119.97 (CH), 61.80 ( $\text{CH}_3$ ), 48.19 ( $\text{CH}_2$ ), 31.49 ( $\text{CH}_2$ ), 30.66 ( $\text{CH}_2$ ), 26.50 ( $\text{CH}_2$ ), 22.51 ( $\text{CH}_2$ ), 14.68 ( $\text{CH}_3$ ), 13.92 ( $\text{CH}_3$ ); IR (thin-film,  $\text{cm}^{-1}$ ): 3377, 3306, 2956, 2929, 2856, 1593, 1492, 1456, 1441, 1365, 1253, 1048, 889, 779, 741; HRMS  $m/z$  (ESI): calculated for  $\text{C}_{15}\text{H}_{24}\text{N}_2\text{OCl}^+$ : 283.1577, found: 283.1584.

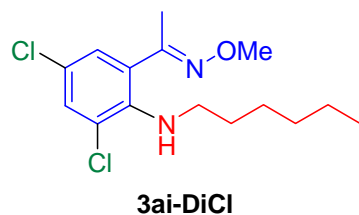

**3ai-DiCl** was synthesized using the general procedure with **1a** as substrate,  $[\text{Cp}^*\text{Rh}(\text{OAc})_2]$  (10 mol%) and without CsOAc, and it was isolated as an white paste (6.3 mg, 12% yield) by flash column chromatography followed by high vacuum evacuation overnight (0.5 mmHg, ~18 h, for removal of **1a** residue).  $R_f = 0.2$  (20% DCM in hexanes).  $^1\text{H}$  NMR ( $\text{CDCl}_3$ , 400 MHz):  $\delta_{\text{H}}$  7.28 (d,  $J = 2.4$  Hz, 1H), 7.12 (d,  $J = 2.4$  Hz, 1H), 4.95 (bs, 1H), 3.98 (s, 3H), 3.07 (t,  $J = 6.8$  Hz, 2H), 2.17 (s, 3H), 1.51-1.47 (m, 2H), 1.33-1.27 (m, 6H), 0.87 (t,  $J = 6.4$  Hz, 3H);  $^{13}\text{C}$  NMR ( $\text{CDCl}_3$ , 100 MHz)  $\delta_{\text{C}}$  155.62 (C), 142.84 (C), 129.42 (CH), 128.34 (CH), 125.30 (C), 124.11 (C), 61.96 ( $\text{CH}_3$ ), 48.14 ( $\text{CH}_2$ ), 31.45 ( $\text{CH}_2$ ), 30.60 ( $\text{CH}_2$ ), 26.45 ( $\text{CH}_2$ ), 22.50 ( $\text{CH}_2$ ), 14.50 ( $\text{CH}_3$ ), 13.91 ( $\text{CH}_3$ ); IR (thin-film,  $\text{cm}^{-1}$ ): 3379, 3306, 2956, 2930, 2856, 1479, 1466, 1440, 1366, 1242, 1050, 863, 817, 743; HRMS  $m/z$  (ESI): calculated for  $\text{C}_{15}\text{H}_{23}\text{N}_2\text{OCl}_2^+$ : 317.1187, found: 317.1181.

#### 4. Preparation of 3fb Crystal for X-ray Diffraction Analysis and the X-ray Structure

**3fb** (0.1 mmol) was dissolved in distilled acetonitrile (1 mL) in an 8-mL vial, and it was loosely covered by a Teflon® liner cap. After slow evaporation over 48 h, orange crystals formed and they were collected for X-ray diffraction analysis.

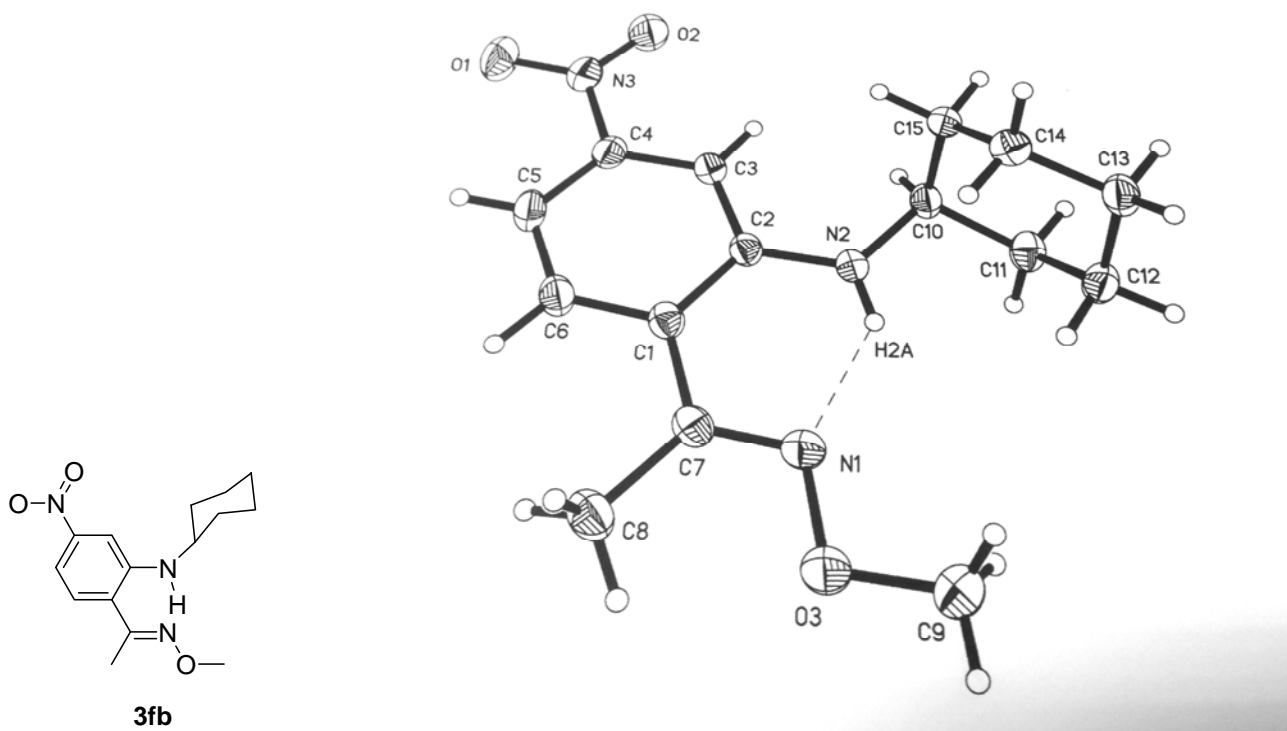

## 5. Stoichiometric Reactions and Characterizations

### 5.1 Procedure for Aminations of Cyclorhodated Complex 4

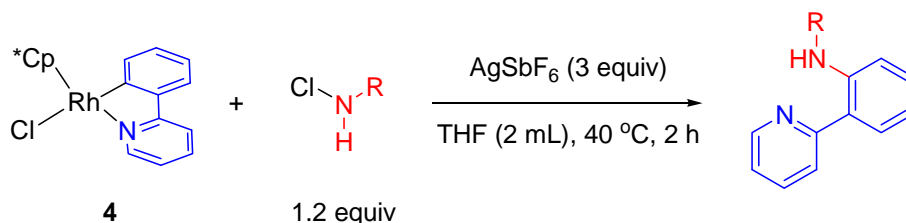

To an amber 8 mL-vial (vial **A**), **4** (0.05 mmol, 21.4 mg) and AgSbF<sub>6</sub> (3 equiv, 51.45 mg) were added, and the vial was sealed with a Teflon® liner cap. To another amber 4-mL vial (vial **B**), *N*-chlorosuccinimide (1.5 equiv, 10.0 mg) was added, and the vial was sealed with a Teflon® liner cap. Both vials were evacuated and back filled with N<sub>2</sub> for three times. Freshly distilled THF (1 mL) was added to the vial **A**, the mixture was pre-heated and stirred at 40 °C for 10 min. THF (1 mL) and primary amine (1.2 equiv) were added to the vial **B**, and they were mixed and stirred for 10 min. The mixture in Vial **B** was transferred to the reaction (vial **A**) in one portion, and stirred at 40 °C for 2 h. To work-up, 30% aqueous ammonia (2 mL) and EtOAc (5 mL) were added. The organic layer was collected, and the aqueous layer was washed with EtOAc (5 mL x 2). The combined organic fractions were dried over Na<sub>2</sub>SO<sub>4</sub> and then filtered through a short plug of silica gel. Solvents were removed by rotary evaporation, and the residue was re-dissolved in a small amount of dichloromethane (DCM). The dissolved mixture was subjected to flash column chromatography with silica gel as the column stationary phase / preparative TLC for isolation by a gradient elution with hexane/Et<sub>2</sub>O.

### 5.2 Product Characterizations

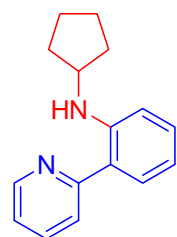

***N*-Cyclopentyl-2-(pyridin-2-yl)aniline**; The title compound was isolated by preparative TLC as a pale yellow oil (9.4 mg, 79% yield). *R*<sub>f</sub> = 0.7 (20% EtOAc in hexanes); <sup>1</sup>H NMR (CDCl<sub>3</sub>, 400 MHz):  $\delta_H$  8.57 (d, *J* = 4.4 Hz, 1H), 8.18 (bs, 1H), 7.74 (t, *J* = 7.2 Hz, 1H), 7.67 (d, *J* = 8.0 Hz, 1H), 7.53 (d, *J* = 7.6 Hz, 1H), 7.27-7.24 (m, 1H), 7.16 (td, *J* = 6.0 Hz, 1H), 6.81 (bd, 1H), 6.71-6.69 (bm, 1), 3.87 (bt, *J* = 5.2 Hz, 1H), 2.06-2.03 (m, 2H), 1.75-1.73 (m, 2H), 1.64-1.58 (m, 4H); <sup>13</sup>C NMR (CDCl<sub>3</sub>, 100 MHz):  $\delta_C$  159.61 (C), 147.22 (CH), 136.80 (CH), 130.16 (CH), 129.34 (CH), 122.22 (CH), 121.45 (C), 120.69 (CH), 115.82 (bs, CH), 115.27 (C), 112.85 (bs, CH), 54.54 (CH), 33.27 (CH<sub>2</sub>), 24.04 (CH<sub>2</sub>); IR (thin-film, cm<sup>-1</sup>): 3291, 2954, 2867, 1604, 1584, 1515, 1478, 1442, 1332, 1240, 745; HRMS *m/z* (ESI): calculated for C<sub>16</sub>H<sub>19</sub>N<sub>2</sub><sup>+</sup>: 239.1538, found: 239.1548.

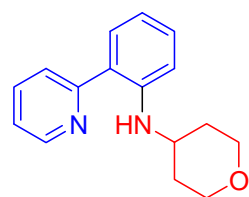

**Tetrahydro-*N*-(2-(pyridin-2-yl)phenyl)-2H-pyran-4-amine**; The title compound was isolated by preparative TLC as a yellow semi-solid (11.6 mg, 93% yield). *R*<sub>f</sub> = 0.55 (20% EtOAc in hexanes); <sup>1</sup>H NMR (CDCl<sub>3</sub>, 400 MHz):  $\delta_H$  8.58 (d, *J* = 4.8 Hz, 1H), 7.77 (t, *J* = 7.2 Hz, 1H), 7.70 (d, *J* = 8.4 Hz, 1H), 7.58 (d, *J* = 7.6 Hz, 1H), 7.27 (t, *J* = 7.6 Hz, 1H), 7.19 (t, *J* = 6.0 Hz, 1H), 6.87 (bs, 1H), 6.78

(bs, 1H), 4.00-3.95 (m, 2H), 3.66-3.63 (m, 1H), 3.58-3.52 (m, 2H), 2.09-2.04 (m, 2H), 1.66-1.57 (m, 2H);  $^{13}\text{C}$  NMR ( $\text{CDCl}_3$ , 100 MHz)  $\delta_{\text{C}}$  159.36 (C), 147.21 (CH), 136.94 (CH), 130.24 (CH), 129.59 (CH), 122.25 (CH), 121.72 (bs, C), 120.86 (CH), 116.37 (bs, CH), 112.68 (bs, CH), 66.37 ( $\text{CH}_2$ ), 48.38 (bs, CH), 32.77 ( $\text{CH}_2$ ) (1 arene-C missing); IR (thin-film,  $\text{cm}^{-1}$ ): 3276, 2952, 2847, 1604, 1584, 1518, 1478, 1443, 1422, 1329, 1259, 1239, 1160, 1138, 1087, 748; HRMS  $m/z$  (ESI): calculated for  $\text{C}_{16}\text{H}_{19}\text{N}_2\text{O}^+$ : 255.1497, found: 255.1494.

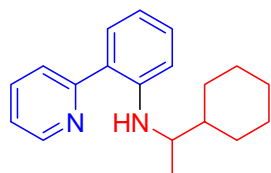

***N*-(1-Cyclohexylethyl)-2-(pyridin-2-yl)benzenamine;** The title compound was isolated by preparative TLC as a pale yellow oil (11.4 mg, 81% yield).  $R_f$  = 0.5 (5% EtOAc in hexanes);  $^1\text{H}$  NMR ( $\text{CDCl}_3$ , 400 MHz):  $\delta_{\text{H}}$  8.57 (d,  $J$  = 4.4 Hz, 1H), 7.74 (t,  $J$  = 7.2 Hz, 1H), 7.69 (d,  $J$  = 8.0 Hz, 1H), 7.56 (d,  $J$  = 7.6 Hz, 1H), 7.24 (t,  $J$  = 7.6 Hz, 1H), 7.16 (t,  $J$  = 6.0 Hz, 1H), 6.81 (bs, 1H), 6.68 (bm, 1H), 3.46-3.43 (m, 1H), 1.87-1.57 (m, 6H), 1.26-1.15 (m, 8H);  $^{13}\text{C}$  NMR ( $\text{CDCl}_3$ , 100

MHz)  $\delta_{\text{C}}$  159.64 (C), 147.11 (CH), 136.70 (CH), 130.23 (CH), 129.58 (C), 129.45 (CH), 122.08 (CH), 121.06 (bs, C), 120.52 (CH), 115.15 (bs, CH), 112.17 (bs, CH), 53.06 (bs, CH), 42.93 (CH), 29.48 ( $\text{CH}_2$ ), 28.60 ( $\text{CH}_2$ ), 26.67 ( $\text{CH}_2$ ), 26.54 ( $\text{CH}_2$ ), 26.37 ( $\text{CH}_2$ ), 16.97 (CH); IR (thin-film,  $\text{cm}^{-1}$ ): 3302, 2924, 2850, 1605, 1584, 1518, 1478, 1445, 1330, 1163, 744; HRMS  $m/z$  (ESI): calculated for  $\text{C}_{19}\text{H}_{25}\text{N}_2^+$ : 281.2018, found: 281.2010.

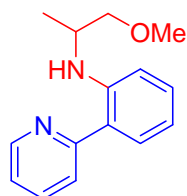

***N*-(1-Methoxypropan-2-yl)-2-(pyridin-2-yl)aniline;** The title compound was isolated by flash column chromatography as a pale yellow oil (10.45 mg, 86% yield).  $R_f$  = 0.3 (60% DCM in hexanes);  $^1\text{H}$  NMR ( $\text{CDCl}_3$ , 400 MHz):  $\delta_{\text{H}}$  8.58 (d,  $J$  = 4.8 Hz, 1H), 8.17 (bs, 1H), 7.74 (t,  $J$  = 7.6 Hz, 1H), 7.66 (d,  $J$  = 8.0 Hz, 1H), 7.53 (d,  $J$  = 7.6 Hz, 1H), 7.27-7.24 (m, 1H), 7.16 (t,  $J$  = 7.6 Hz, 1H), 6.84 (bs, 1H), 6.72 (bs, 1H), 3.77-3.73 (m, 1H), 3.58-3.54 (m, 1H), 3.39-3.32 (m, 4H), 1.29 (d,  $J$  = 6.4);  $^{13}\text{C}$  NMR ( $\text{CDCl}_3$ , 100

MHz)  $\delta_{\text{C}}$  157.37 (C), 147.29 (CH), 139.56 (C), 136.78 (CH), 130.20 (CH), 129.58 (CH), 123.63 (C), 122.29 (CH), 120.74 (CH), 115.78 (CH), 77.14 (CH), 59.04 ( $\text{CH}_3$ ), 17.91 ( $\text{CH}_3$ ) (1 arene-CH, 1 alkyl- $\text{CH}_2$  missing); IR (thin-film,  $\text{cm}^{-1}$ ): 3270, 2973, 2924, 1064, 1585, 1517, 1478, 1443, 1389, 1239, 1168, 1110, 747; HRMS  $m/z$  (ESI): calculated for  $\text{C}_{15}\text{H}_{19}\text{N}_2\text{O}^+$ : 243.1497, found: 243.1508.

## 6. *O*-Methyloxime Arylamine Product Deprotection and Characterizations

### 6.1 Procedure for Deprotection of the *O*-Methyloxime Arylamine Products

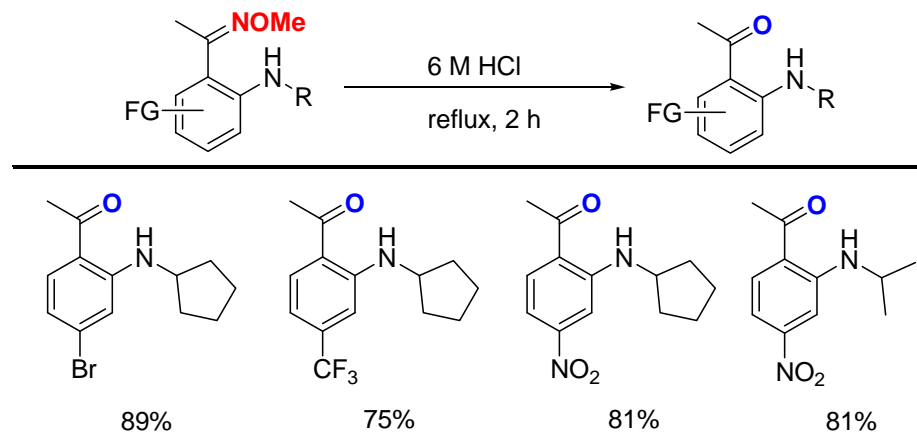

To an 8-mL vial containing *O*-methyloxime arylamine product (0.1 mmol), 6 M HCl (0.5 mL) was added, and the vial was tightly sealed with a Teflon® liner cap. The mixture was stirred vigorously at reflux (oil bath temp. = 120 ° C) for 2 h. To work-up, the solution was diluted with DI water (5 mL) and it was neutralized with saturated NaHCO<sub>3</sub> solution followed by the addition ethyl acetate (10 mL). The organic fraction was collected, and the aqueous fraction was washed with ethyl acetate (10 mL) twice. The combined organic fractions were washed with brine, dried over Na<sub>2</sub>SO<sub>4</sub>, and filtered through a short plug of Celite®. The solution was dried using a rotary evaporator, and the resulting residue was dissolved in a small amount of dichloromethane followed by a flash column chromatography using silica gel as the stationary phase for isolation of the 2-acetyl-*N*-alkylaniline products.

### 6.2 Product Characterizations

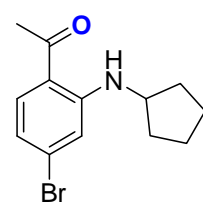 **1-(4-bromo-2-(cyclopentylamino)phenyl)ethanone** isolated as a yellow oil (25.0 mg, 89% yield) by flash column chromatography. *R*<sub>f</sub> = 0.35 (10% DCM in hexanes); <sup>1</sup>H NMR (CDCl<sub>3</sub>, 400 MHz): δ<sub>H</sub> 8.99 (bs, 1H), 7.50 (d, *J* = 8.8 Hz, 1H), 6.87 (d, *J* = 2.0 Hz, 1H), 6.65 (dd, *J* = 8.4 Hz, 2.0 Hz, 1H), 3.84-3.79 (m, 1H), 2.52 (s, 3H), 2.06-1.78 (m, 2H), 1.77-1.75 (m, 2H), 1.66-1.63 (m, 2H), 1.62-1.61 (m, 2H); <sup>13</sup>C NMR (CDCl<sub>3</sub>, 100 MHz) δ<sub>C</sub> 199.98 (C), 151.20 (C), 133.88 (CH), 129.91 (C), 116.69 (CH), 116.12 (C), 115.06 (CH), 53.50 (CH), 33.26 (CH<sub>2</sub>), 27.79 (CH<sub>3</sub>), 23.92 (CH<sub>2</sub>); IR (thin-film, cm<sup>-1</sup>): 3284, 2958, 2869, 1639, 1594, 1563, 1504, 1439, 1358, 1239, 954; HRMS *m/z* (ESI): calculated for C<sub>13</sub>H<sub>17</sub>NOBr<sup>+</sup>: 282.0494, found: 282.0506.



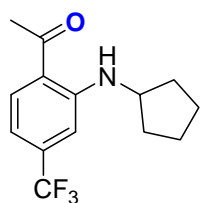

**1-(2-(cyclopentylamino)-4-(trifluoromethyl)phenyl)ethanone** isolated as a yellow oil (20.3 mg, 75% yield) by flash column chromatography.  $R_f = 0.35$  (10% DCM in hexanes);  $^1\text{H}$  NMR ( $\text{CDCl}_3$ , 400 MHz):  $\delta_H$  9.04 (bs, 1H), 7.81 (d,  $J = 8.4$  Hz, 1H), 6.94 (s, 1H), 6.75 (d,  $J = 8.4$  Hz, 1H), 3.91-3.87 (m, 1H), 2.59 (s, 3H), 2.08-2.04 (m, 2H), 1.79-1.76 (m, 2H), 1.68-1.65 (m, 2H), 1.64-1.61 (m, 2H);  $^{13}\text{C}$  NMR ( $\text{CDCl}_3$ , 100 MHz)  $\delta_C$  200.39 (C), 150.21 (C), 136.22-135.24 (q,  $J = 31$  Hz, C), 133.31 (CH), 127.70-119.77 (q,  $J = 260$  Hz,  $\text{CF}_3$ ), 118.91 (C), 109.43-109.28 (m, CH) (1 CH missing); IR (thin-film,  $\text{cm}^{-1}$ ): 3297, 2960, 2872, 1650, 1577, 1524, 1464, 1337, 1240, 1171, 1128, 1089, 962; HRMS  $m/z$  (ESI): calculated for  $\text{C}_{14}\text{H}_{17}\text{NOF}_3$ : 272.1262, found: 272.1253.

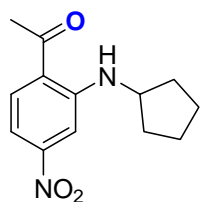

**1-(2-(cyclopentylamino)-4-nitrophenyl)ethanone** isolated as an orange solid (20.1 mg, 81% yield) by flash column chromatography.  $R_f = 0.20$  (20% DCM in hexanes); mp = 66.0-68.5 °C;  $^1\text{H}$  NMR ( $\text{CDCl}_3$ , 400 MHz):  $\delta_H$  9.07 (bs, 1H), 7.85 (d,  $J = 8.8$  Hz, 1H), 7.54 (d,  $J = 2.0$  Hz, 1H), 7.24 (dd,  $J = 8.8$  Hz, 2.4 Hz, 1H), 3.95-3.89 (m, 1H), 2.62 (s, 3H), 2.12-2.08 (m, 2H), 1.79-1.77 (m, 2H), 1.71-1.67 (m, 2H), 1.62-1.56 (m, 2H);  $^{13}\text{C}$  NMR ( $\text{CDCl}_3$ , 100 MHz)  $\delta_C$  200.21 (C), 151.52 (C), 150.67 (C), 133.79 (CH), 120.43 (C), 107.28 (CH), 53.80 (CH), 33.22 ( $\text{CH}_2$ ), 28.28 ( $\text{CH}_3$ ), 23.92 ( $\text{CH}_2$ ) (1 CH missing); IR (KBr,  $\text{cm}^{-1}$ ): 3305, 2960, 2872, 1650, 1537, 1350, 1264, 1232; HRMS  $m/z$  (ESI): calculated for  $\text{C}_{13}\text{H}_{17}\text{N}_2\text{O}_3$ : 249.1239, found: 249.1243.

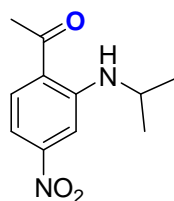

**1-(2-(isopropylamino)-4-nitrophenyl)ethanone** isolated as an orange solid (20.1 mg, 81% yield) by flash column chromatography.  $R_f = 0.35$  (30% DCM in hexanes); mp = 54.0-55.0 °C;  $^1\text{H}$  NMR ( $\text{CDCl}_3$ , 400 MHz):  $\delta_H$  8.98 (bs, 1H), 7.86 (d,  $J = 8.8$  Hz, 1H), 7.52 (d,  $J = 2.0$  Hz, 1H), 7.30 (dd,  $J = 8.8$  Hz, 1.6 Hz, 1H), 3.83-3.74 (m, 1H), 2.62 (s, 3H), 1.31 (d,  $J = 6.4$  Hz, 6H);  $^{13}\text{C}$  NMR ( $\text{CDCl}_3$ , 100 MHz)  $\delta_C$  200.26 (C), 151.65 (C), 150.24 (C), 133.94 (CH), 120.36 (C), 107.21 (CH), 106.84 (CH), 43.71 (CH), 28.33 ( $\text{CH}_3$ ), 22.46 ( $\text{CH}_3$ ); IR (KBr,  $\text{cm}^{-1}$ ): 3287, 2983, 2928, 1647, 1529, 1346, 1231, 1169, 1130; HRMS  $m/z$  (ESI): calculated for  $\text{C}_{11}\text{H}_{15}\text{N}_2\text{O}_3$ : 223.1083, found: 223.1080.

## 7. Kinetic Isotope Effect Experiments

### 7.1 Experimental Procedures for Two Parallel Reactions

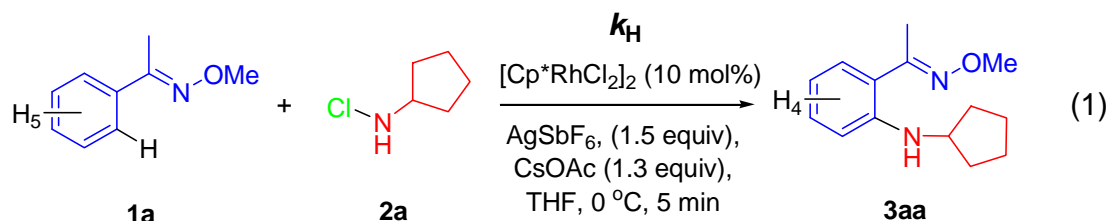

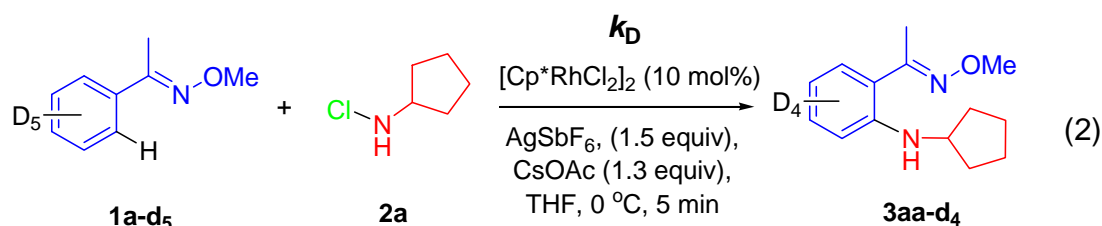

To an amber 8 mL-vial (vial **A**),  $[\text{Cp}^*\text{RhCl}_2]_2$  (10 mol %, 6.2 mg), CsOAc (1.3 equiv, 24.8 mg) and  $\text{AgSbF}_6$  (1.5 equiv, 51.5 mg) were added, and the vial was sealed with a Teflon® liner cap. To another amber 4-mL vial (vial **B**), *N*-chlorosuccinimide (2.2 equiv, 58.7 mg) was added, and the vial was sealed with a Teflon® liner cap. Both vials were evacuated and back filled with  $\text{N}_2$  for three times. Freshly distilled THF (1 mL) was added to the vial **A**, followed by the addition of the  $\text{H}_5$ -acetophenone-*O*-methyloxime (0.1 mmol) using a 50- $\mu\text{L}$  syringe. Vial **A** was pre-cooled at  $0^\circ\text{C}$ . THF (1 mL) and cyclopentylamine (2.2 equiv, 22  $\mu\text{L}$ ) were added to the vial **B**, and they were mixed and stirred for 10 min. The mixture in Vial **B** was taken up by a 1-mL syringe, and added to the reaction (vial **A**) in one portion, and the reaction was stirred at  $0^\circ\text{C}$  for 5 min. The reaction was quenched by adding 30% aqueous ammonia (2 mL). EtOAc (5 mL) were added for extraction. The organic layer was collected, and the aqueous layer was washed with EtOAc (5 mL x 2). The combined organic fractions were dried over  $\text{Na}_2\text{SO}_4$  and then filtered through a short plug of Celite®. Solvent was removed by rotary evaporation, and the residue was subjected to  $^1\text{H}$  NMR analysis to determine the substrate conversions. (singlet signal at 2.20 ppm, 3H, was used as the marker peak with reference to the singlet signal at 4.9 ppm, 2H, from dibromomethane (0.1 mmol) as internal standard.)

A parallel reaction was run at the same time with  $\text{d}_5$ -acetophenone-*O*-methyloxime as substrate. The pair of reactions was duplicated.

## 7.2 Experimental Data & Calculated KIE

**Table S1:** Data for Kinetic Isotope Effect

| runs                | Conversion for <b>1a</b> | Conversion For <b>1a-d<sub>5</sub></b> | reaction time | ratio of the remaining <b>1a/1a-d<sub>5</sub></b> (mmol/mmol) | ratio of the consumed <b>1a/1a-d<sub>5</sub></b> (mmol/mmol) | $k_H / k_D$ |
|---------------------|--------------------------|----------------------------------------|---------------|---------------------------------------------------------------|--------------------------------------------------------------|-------------|
| 1 <sup>st</sup> run | 21%                      | 9.6%                                   | 5 min         | 0.0790/0.0904                                                 | 0.0210/0.0096                                                | 2.19        |
| 2 <sup>nd</sup> run | 22%                      | 12%                                    | 5 min         | 0.078/0.088                                                   | 0.022/0.012                                                  | 1.83        |
| average             |                          |                                        |               |                                                               |                                                              | 2.01        |

## 8. Hammett Correlation Studies

### 8.1 Experimental Procedures

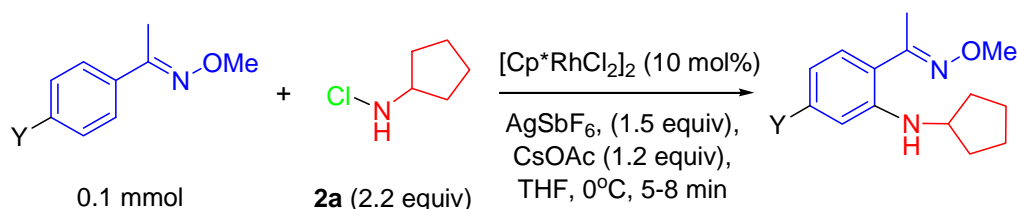

To an amber 8 mL-vial (vial **A**),  $[\text{Cp}^*\text{RhCl}_2]_2$  (10 mol %, 6.2 mg),  $\text{CsOAc}$  (1.3 equiv, 24.8 mg) and  $\text{AgSbF}_6$  (1.5 equiv, 51.5 mg) were added, and the vial was sealed with a Teflon® liner cap. To another amber 4-mL vial (vial **B**), *N*-chlorosuccinimide (2.2 equiv, 58.7 mg) was added, and the vial was sealed with a Teflon® liner cap. Both vials were evacuated and back filled with  $\text{N}_2$  for three times. Freshly distilled THF (1 mL) was added to the vial **A**, followed by the addition of a suitable *para*-substituted acetophenone *O*-methyloxime (0.1 mmol) using a 50- $\mu\text{L}$  syringe. Vial **A** was pre-cooled at  $0^\circ\text{C}$ . THF (1 mL) and cyclopentylamine (2.2 equiv, 22  $\mu\text{L}$ ) were added to the vial **B**, and they were mixed and stirred for 10 min. The mixture in Vial **B** was taken up by a 1-mL syringe, and added to the reaction (vial **A**) in one portion, and the reaction was stirred at  $0^\circ\text{C}$  for 5 - 8 min. The reaction was quenched by adding 30% aqueous ammonia (2 mL). EtOAc (5 mL) were added for extraction. The organic layer was collected, and the aqueous layer was washed with EtOAc (5 mL x 2). The combined organic fractions were dried over  $\text{Na}_2\text{SO}_4$  and then filtered through a short plug of Celite®. Solvent was removed by rotary evaporation, and the residue was subjected to  $^1\text{H}$  NMR analysis to determine the substrate conversions. (*Dibromomethane* (0.1 mmol) was used as internal standard, singlet signal at 4.9 ppm.) All reactions were duplicated.

### 8.2 Experimental Data & Hammett Plot

**Table S2:** Data for Hammett Correlation

| runs            | Y             | Marker peak<br>in $^1\text{H}$ NMR | $\sigma_{para}^4$ | t<br>(min) | substrate<br>remained<br>(mmol) | substrate<br>consumed<br>(mmol) | $k_x$ (average)<br>( $k_H$ for H)<br>(mmol / min) | $\log(k_x / k_H)$ |
|-----------------|---------------|------------------------------------|-------------------|------------|---------------------------------|---------------------------------|---------------------------------------------------|-------------------|
| 1 <sup>st</sup> | OMe           | 7.57, 2H,<br>d                     | -0.27             | 5          | 0.06932                         | 0.03068                         | 0.006158                                          | 0.1525            |
| 2 <sup>nd</sup> | OMe           |                                    |                   | 5          | 0.06910                         | 0.03090                         |                                                   |                   |
| 1 <sup>st</sup> | H             | 7.65-7.62,<br>2H, m                | 0                 | 5          | 0.07877                         | 0.02123                         | 0.004318                                          | 0                 |
| 2 <sup>nd</sup> | H             |                                    |                   | 5          | 0.07805                         | 0.02195                         |                                                   |                   |
| 1 <sup>st</sup> | Cl            | 7.57, 2H,<br>d                     | 0.24              | 5          | 0.08327                         | 0.01673                         | 0.003341                                          | -0.1114           |
| 2 <sup>nd</sup> | Cl            |                                    |                   | 5          | 0.08332                         | 0.01668                         |                                                   |                   |
| 1 <sup>st</sup> | $\text{CF}_3$ | 7.75, 2H,<br>d                     | 0.53              | 8          | 0.09158                         | 0.00842                         | 0.001117                                          | -0.5873           |
| 2 <sup>nd</sup> | $\text{CF}_3$ |                                    |                   | 8          | 0.09055                         | 0.00945                         |                                                   |                   |
| 1 <sup>st</sup> | $\text{NO}_2$ | 8.18, 2H,<br>d                     | 0.78              | 8          | 0.09392                         | 0.00608                         | 0.000092                                          | -0.6706           |
| 2 <sup>nd</sup> | $\text{NO}_2$ |                                    |                   | 8          | 0.09133                         | 0.00867                         |                                                   |                   |

**Figure S1:** Hammett Free Energy Correlation

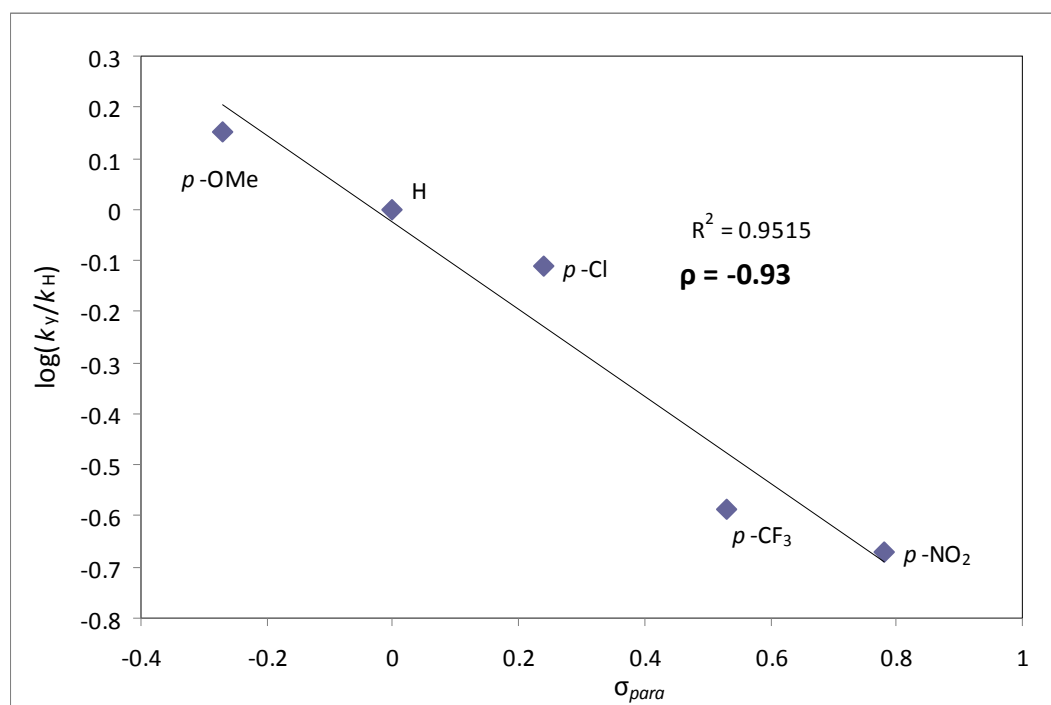

## 9. Reaction Optimization

**Table S3:** Preliminary Results.<sup>a</sup>

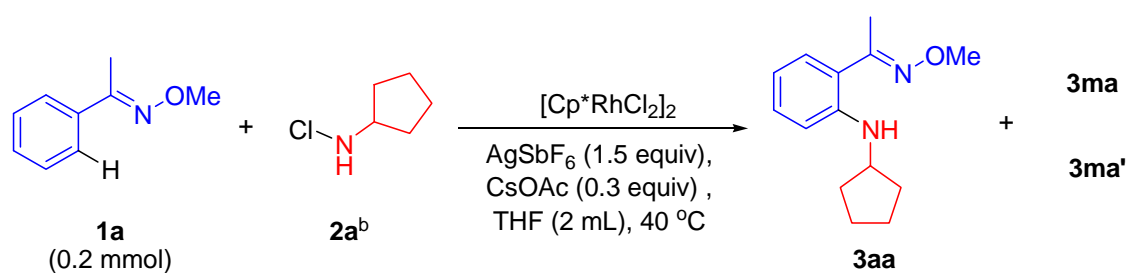

| entry          | $[\text{Cp}^*\text{Rh}(\text{Cl})_2]_2$<br>(mol%) | addition of <b>2a</b><br>(equiv) | time | conv.<br>(%) <sup>c</sup> | <b>3aa</b><br>(%) <sup>c</sup> | <b>3ma'</b><br>(%) <sup>c</sup> | <b>3ma</b><br>(%) <sup>c</sup> |
|----------------|---------------------------------------------------|----------------------------------|------|---------------------------|--------------------------------|---------------------------------|--------------------------------|
| 1              | 2.5                                               | one-pot (1.1)                    | 1 h  | 50                        | 10                             | 10                              | 25                             |
| 2              | --                                                | one-pot (1.1)                    | 1 h  | <5                        | --                             | --                              | --                             |
| 3 <sup>d</sup> | 5                                                 | 1.1 equiv / h<br>(1.1)           | 2 h  | 60                        | 33                             | 6                               | 15                             |

4<sup>d</sup>      5      1.1 equiv / h  
(2.2)      3 h      90      (28)<sup>e</sup>      (22)<sup>e</sup>      (40)<sup>e</sup>

<sup>a</sup>Reaction conditions: **1a** (0.2 mmol), [Cp\*RhCl<sub>2</sub>]<sub>2</sub>, AgSbF<sub>6</sub> (1.5 equiv), CsOAc (0.3 equiv), **2a**, THF (2 mL), at 40 °C. <sup>b</sup>**2a** was freshly prepared by mixing cyclopentylamine and *N*-chlorosuccinimide (1:1), and stirred at rt for 10 min. <sup>c</sup>Yields and conversions were determined by <sup>1</sup>H NMR. <sup>d</sup>**2a** was added slowly via a syringe pump. <sup>e</sup>Isolated yields in parentheses.

**Table S4:** Effect of Additives<sup>a</sup>

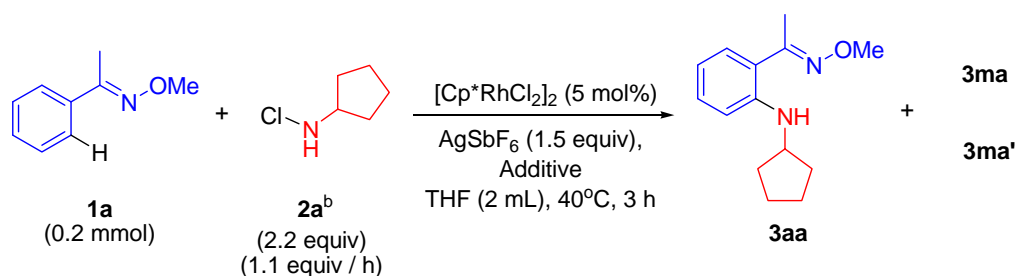

| entry          | base (equiv)                        | CsOAc (equiv) | conv. (%) <sup>c</sup> | <b>3aa</b> (%) <sup>c</sup> | <b>3ma</b> (%) <sup>c</sup> | <b>3ma'</b> (%) <sup>c</sup> |
|----------------|-------------------------------------|---------------|------------------------|-----------------------------|-----------------------------|------------------------------|
| 1              | KOtBu 1.3                           | 0.3           | 10                     | <5                          | --                          | --                           |
| 2              | K <sub>2</sub> CO <sub>3</sub> 1.3  | 0.3           | 50                     | 35                          | --                          | --                           |
| 3              | KHCO <sub>3</sub> 1.3               | 0.3           | 42                     | 28                          | --                          | --                           |
| 4              | K <sub>3</sub> PO <sub>4</sub> 1.3  | 0.3           | 48                     | 33                          | trace                       | --                           |
| 5              | K <sub>2</sub> HPO <sub>4</sub> 1.3 | 0.3           | 52                     | 18                          | 17                          | 8                            |
| 6              | KOAc 1.3                            | --            | 79                     | 77                          | trace                       | --                           |
| 7 <sup>d</sup> | AgOAc 1.5                           | --            | <5                     | <5                          | --                          | --                           |
| 8              | --                                  | 1.3           | 77                     | 73                          | trace                       | --                           |
| 9              | --                                  | 0.6           | 74                     | 20                          | 25                          | 17                           |
| 10             | --                                  | 0.3           | 90                     | (28) <sup>e</sup>           | (22) <sup>e</sup>           | (40) <sup>e</sup>            |
| 11             | --                                  | 2.0           | 30                     | 18                          | --                          | --                           |

<sup>a</sup>Reaction conditions: **1a** (0.2 mmol), [Cp\*RhCl<sub>2</sub>]<sub>2</sub> (5 mol%), AgSbF<sub>6</sub> (1.5 equiv), CsOAc, THF (1 mL), at 40 °C for 3 h and **2a** (2.2 equiv in 1 mL THF) was added slowly via a syringe pump at a rate of 1.1 equiv / h. <sup>b</sup>**2a** was freshly prepared by mixing cyclopentylamine and *N*-chlorosuccinimide (1:1) and stirred at rt for 10 min. <sup>c</sup>Yields and conversions were determined by <sup>1</sup>H NMR. <sup>d</sup>No AgSbF<sub>6</sub> was added. <sup>e</sup>Isolated yields in parentheses.

**Table S5:** Solvent Effect<sup>a</sup>

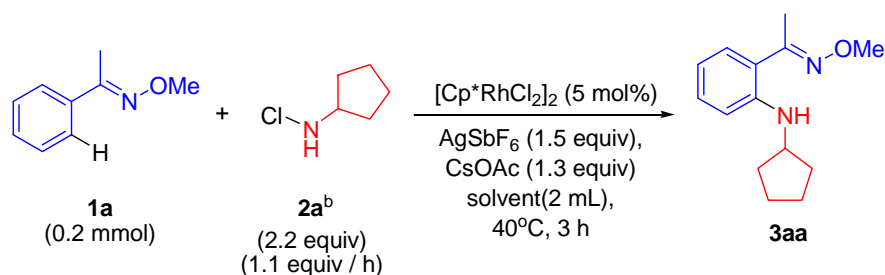

| entry | Solvent             | <b>3aa</b> (%) <sup>c</sup> |
|-------|---------------------|-----------------------------|
| 1     | THF                 | 73                          |
| 2     | <i>tert</i> -amylOH | < 5                         |
| 3     | 1,2-dichloroethane  | 9                           |
| 4     | toluene             | --                          |
| 5     | 1,4-dioxane         | < 5                         |

<sup>a</sup>Reaction conditions: **1a** (0.2 mmol),  $[\text{Cp}^*\text{RhCl}_2]_2$  (5 mol%),  $\text{AgSbF}_6$  (1.5 equiv),  $\text{CsOAc}$  (1.3 equiv), solvent (1 mL), at 40 °C for 3 h and **2a** (2.2 equiv in 1 mL solvent) was added slowly via a syringe pump at a rate of 1.1 equiv / h <sup>b</sup>**2a** was freshly prepared by mixing cyclopentylamine and *N*-chlorosuccinimide (1:1) and stirred at rt for 10 min. <sup>c</sup>Yields were determined by <sup>1</sup>H NMR.

**Table S6:** Effect of Temperature<sup>a</sup>

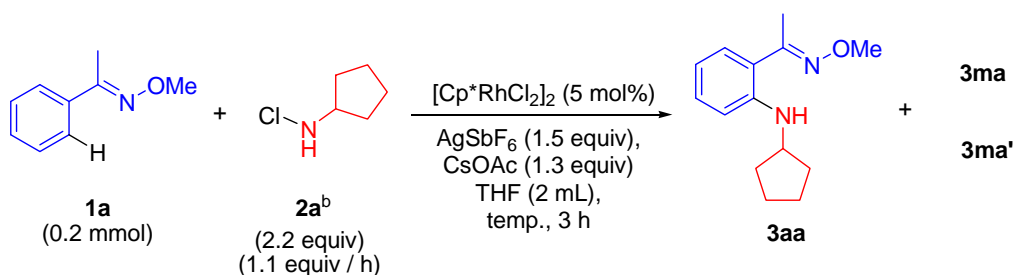

| entry | temp. | conv. (%) <sup>c</sup> | <b>3aa</b> (%) <sup>c</sup> | <b>3ma'</b> (%) <sup>c</sup> | <b>3ma</b> (%) <sup>c</sup> |
|-------|-------|------------------------|-----------------------------|------------------------------|-----------------------------|
| 1     | rt    | 83                     | 76                          | --                           | trace                       |
| 2     | 40°C  | 77                     | 73                          | --                           | trace                       |
| 3     | 60°C  | 66                     | 27                          | 5                            | 10                          |

<sup>a</sup>Reaction conditions: **1a** (0.2 mmol),  $[\text{Cp}^*\text{RhCl}_2]_2$  (5 mol%),  $\text{AgSbF}_6$  (1.5 equiv),  $\text{CsOAc}$  (1.3 equiv), THF (1 mL) for 3 h and **2a** (2.2 equiv in 1 mL THF) was added slowly via a syringe pump at a rate of 1.1 equiv / h <sup>b</sup>**2a** was freshly prepared by mixing cyclopentylamine and *N*-chlorosuccinimide (1:1) and stirred at rt for 10 min. <sup>c</sup>Yields and conversions were determined by <sup>1</sup>H NMR.



**Table S7:** Effect of **2a** amount and the addition rate.<sup>a</sup>

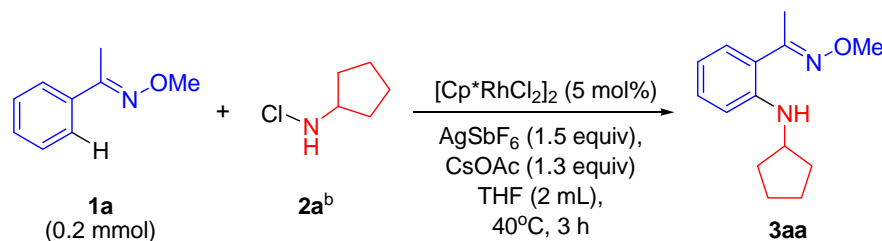

| entry          | <b>2a</b> (equiv) | rate of <b>2a</b> addition | time | conv. (%) <sup>c</sup> | <b>3aa</b> (%) <sup>c</sup> |
|----------------|-------------------|----------------------------|------|------------------------|-----------------------------|
| 1              | 2.2               | 0.7 equiv / h              | 5 h  | 66                     | 65                          |
| 2              | 2.2               | 1.1 equiv / h              | 3 h  | 77                     | 73                          |
| 3              | 2.2               | 2.2 equiv / h              | 2 h  | 83                     | (80) <sup>d</sup>           |
| 4              | 2.5               | 2.2 equiv / h              | 2 h  | 64                     | 65                          |
| 5              | 3                 | 3 equiv / h                | 2 h  | 55                     | 43                          |
| 6              | 1.8               | 1.8 equiv / h              | 2 h  | 61                     | 59                          |
| 7 <sup>e</sup> | 2.2               | 2.2 equiv / h              | 2 h  | 68                     | 45                          |

<sup>a</sup>Reaction conditions: **1a** (0.2 mmol),  $[\text{Cp}^*\text{RhCl}_2]_2$  (5 mol%),  $\text{AgSbF}_6$  (1.5 equiv),  $\text{CsOAc}$  (1.3 equiv), THF (1 mL) for 3 h and **2a** (in 1 mL THF) was added slowly via a syringe pump. <sup>b</sup>**2a** was freshly prepared by mixing cyclopentylamine and *N*-chlorosuccinimide (1:1) and stirred at rt for 10 min. <sup>c</sup>Yields and conversions were determined by  $^1\text{H}$  NMR. <sup>d</sup>Isolated yield in parentheses. <sup>e</sup>**2a** was individually synthesized using  $\text{NaOCl}$  (aq. ~14%) instead of prepared freshly.

## 10. References

- Kang, J. W.; Moseley, K.; Maitlis, P. M. *J. Am. Chem. Soc.* **1969**, *91*, 5970.
- Li, L.; Brennessel, W. W.; Jones, W. D. *Organometallics* **2009**, *28*, 3492.
- Perrin, D. D.; Armarego, W. L. F. *Purification of Laboratory Chemicals*, 4<sup>th</sup> ed.; Butterworth Heinemann: London, England, 1996.
- Isaacs, N. S. *Physical Organic Chemistry*, 2<sup>nd</sup> ed.; Longman Scientific & Technical: UK., 1995..

## 11. $^1\text{H}$ NMR and $^{13}\text{C}$ NMR Spectra (COSY & NOSY for **3na-3Cl**)

$^1\text{H}$  NMR spectrum of **3aa**

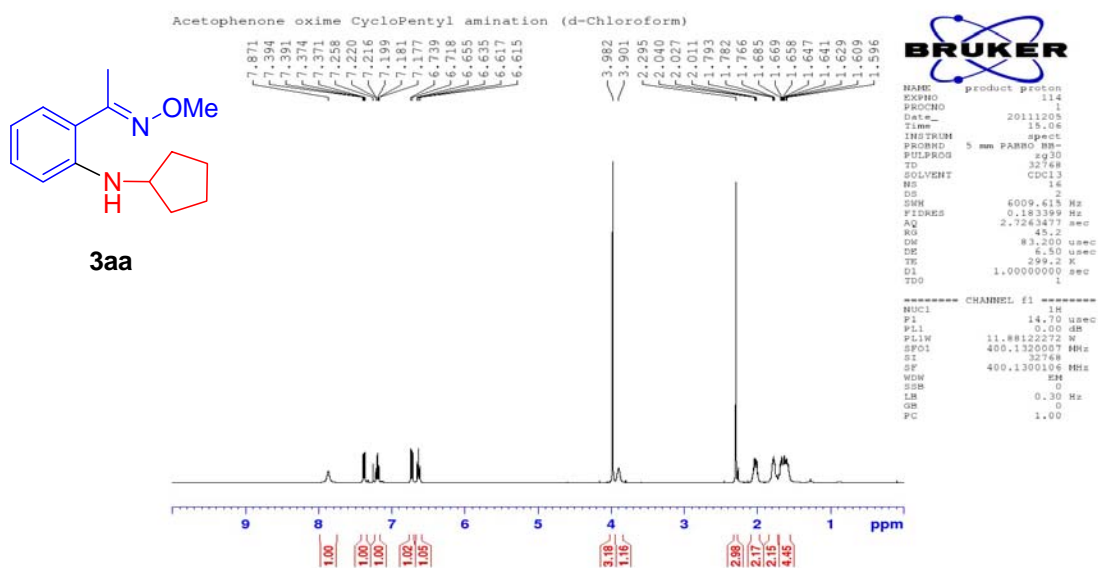

$^{13}\text{C}$  NMR spectrum of **3aa**

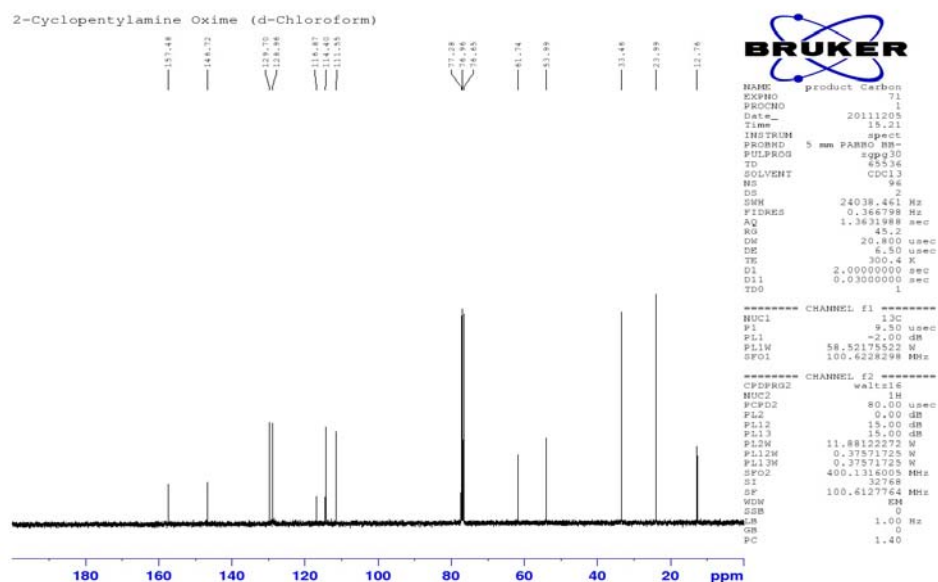

$^1\text{H}$  NMR spectrum of **3ma**

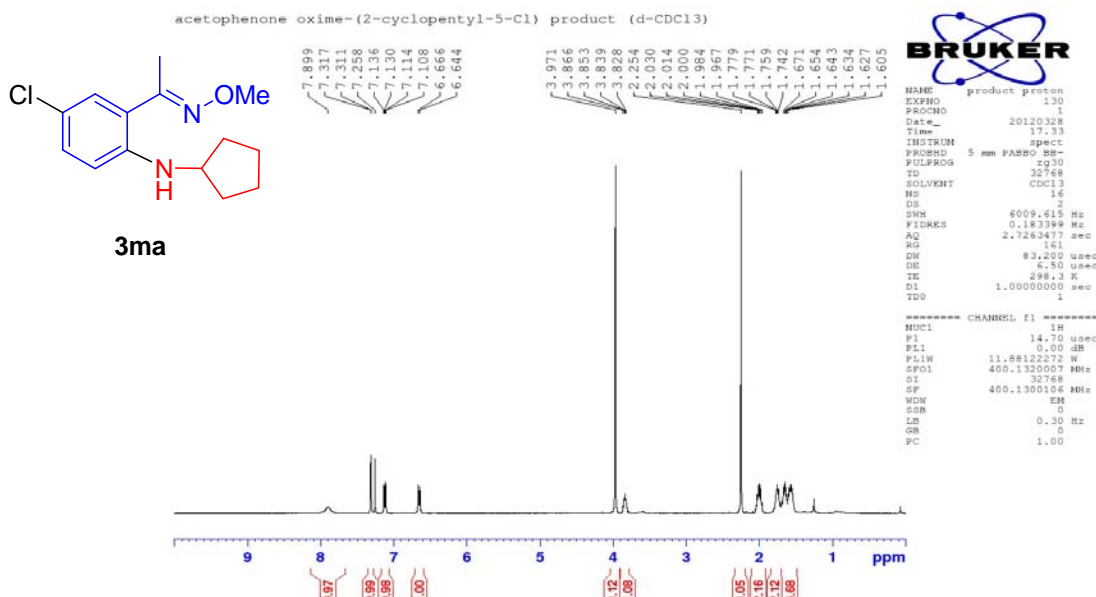

<sup>13</sup>C NMR spectrum of **3ma**

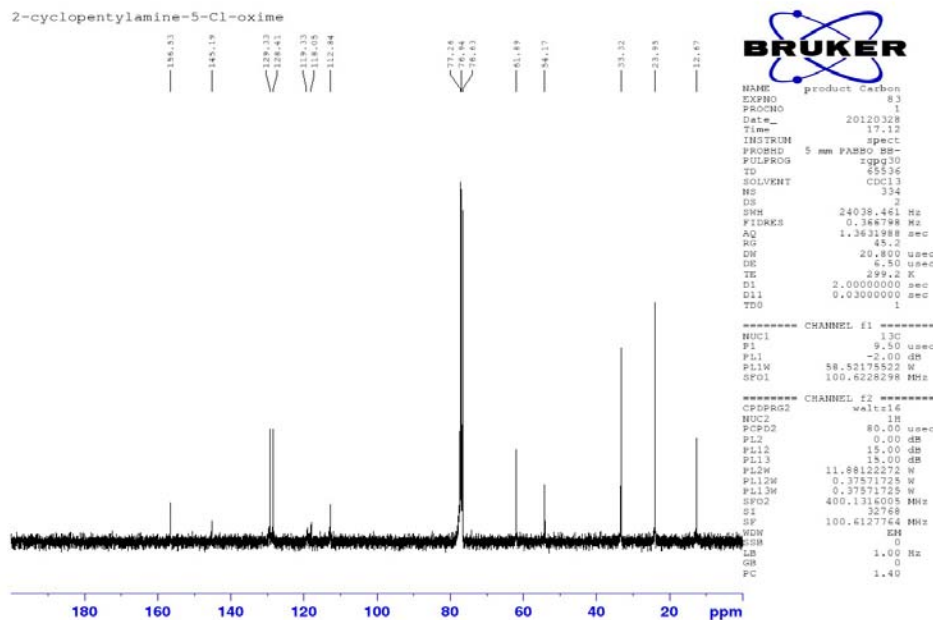

<sup>1</sup>H NMR spectrum of **3ma'**

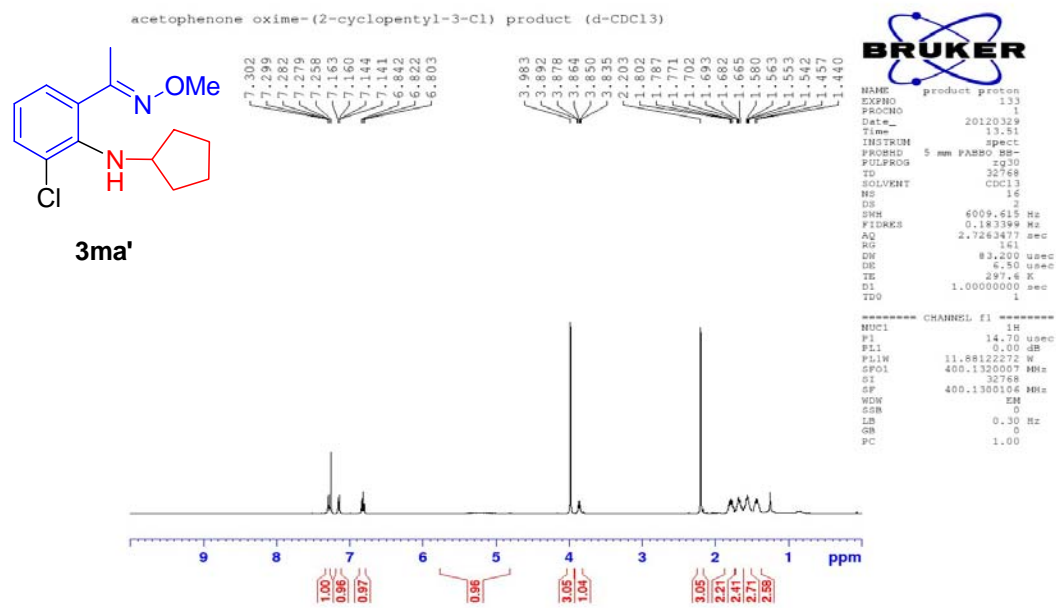

<sup>13</sup>C NMR spectrum of **3ma'**

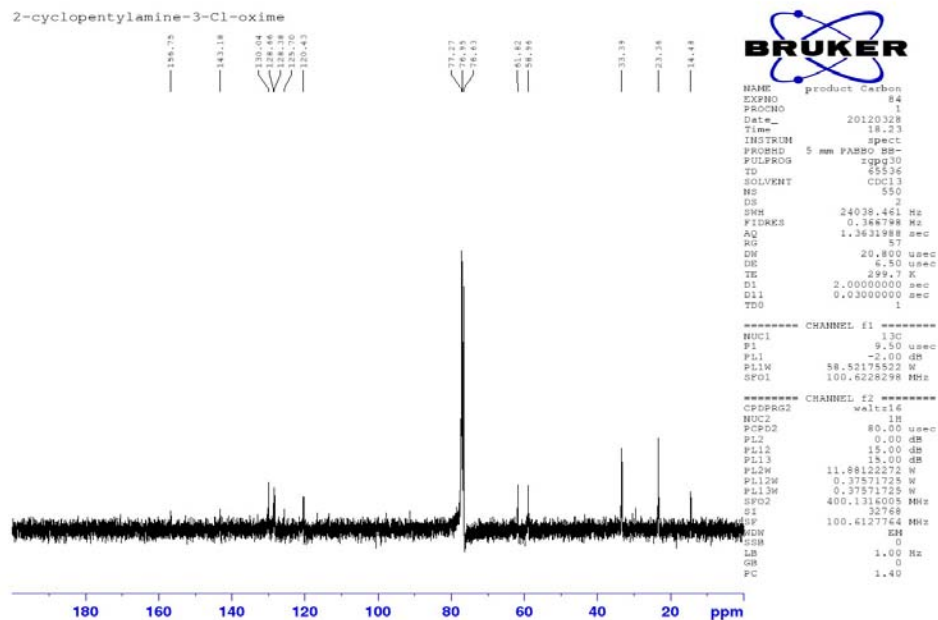

<sup>1</sup>H NMR Spectrum of **3ba**

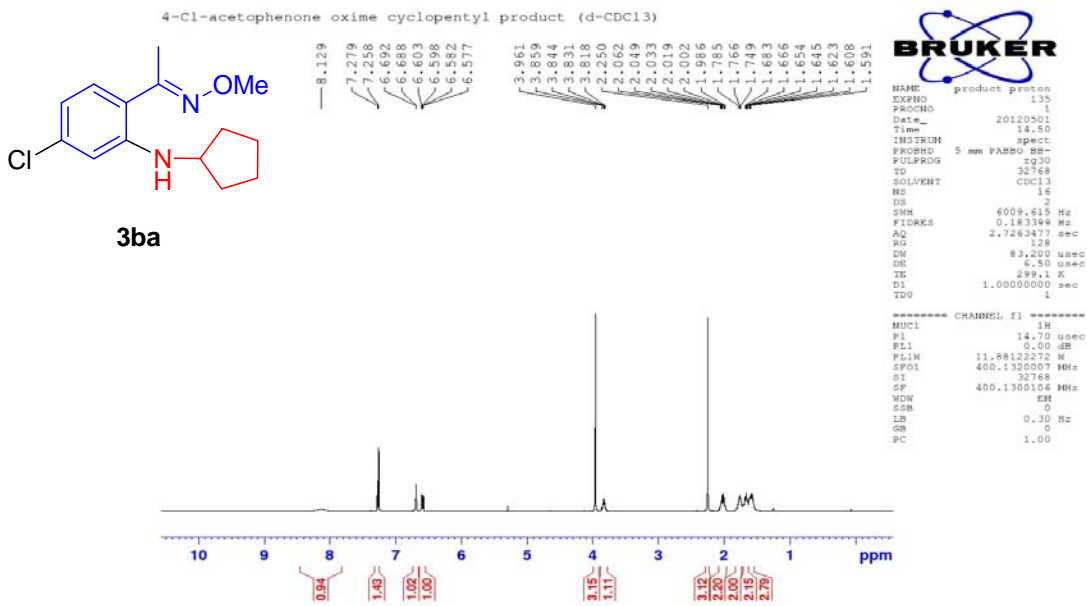

<sup>13</sup>C spectrum of **3ba**

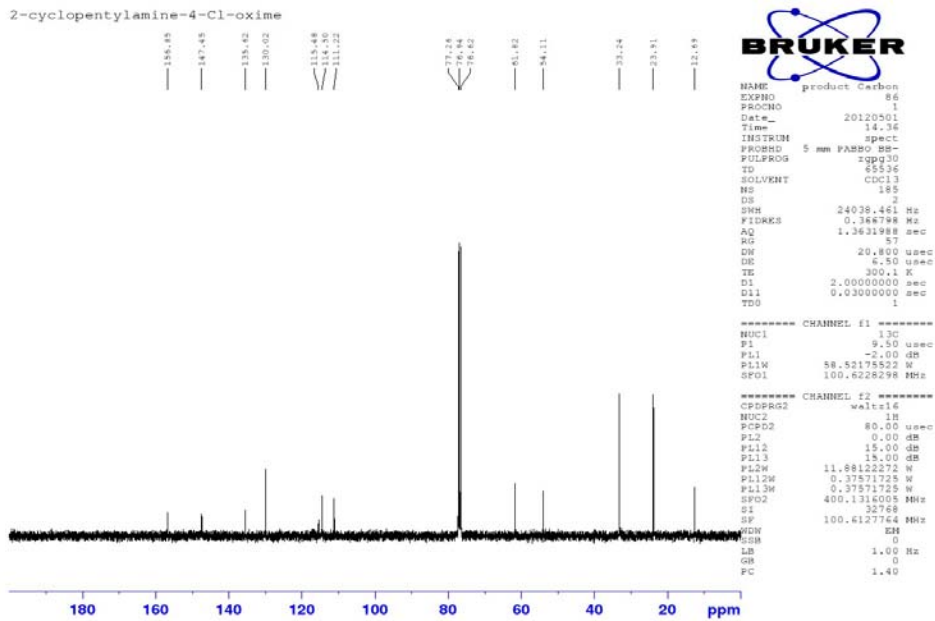

<sup>1</sup>H NMR spectrum of **3ca**

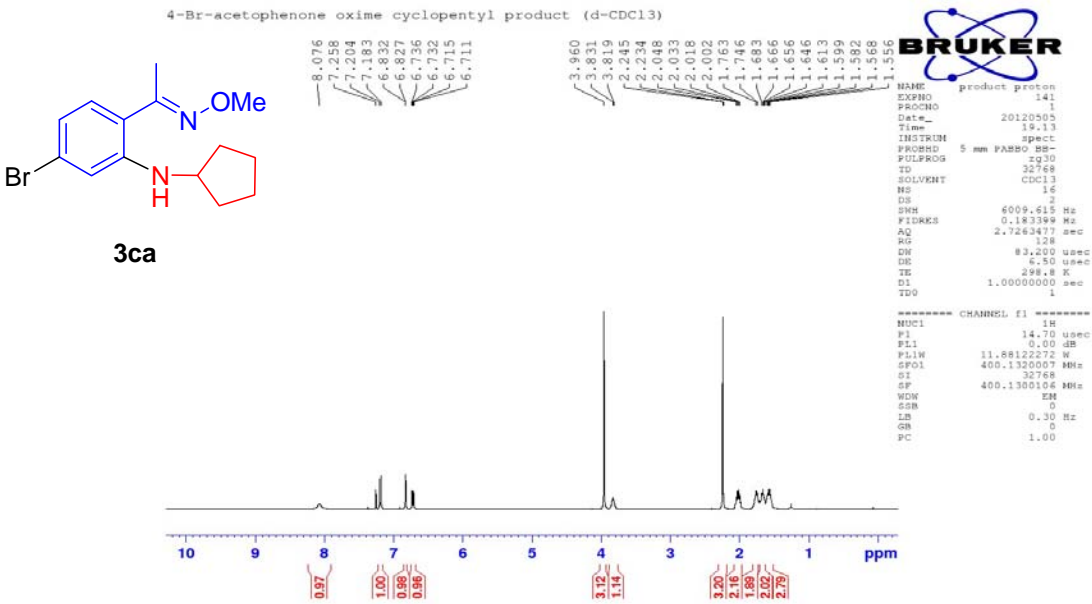

<sup>13</sup>C NMR spectrum of **3ca**

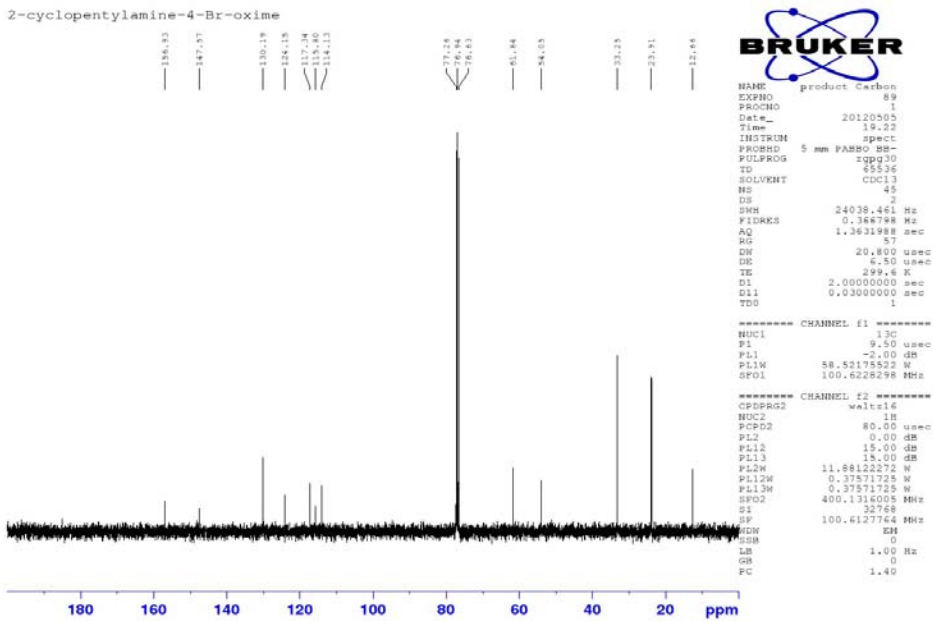

<sup>1</sup>H NMR spectrum of **3da**



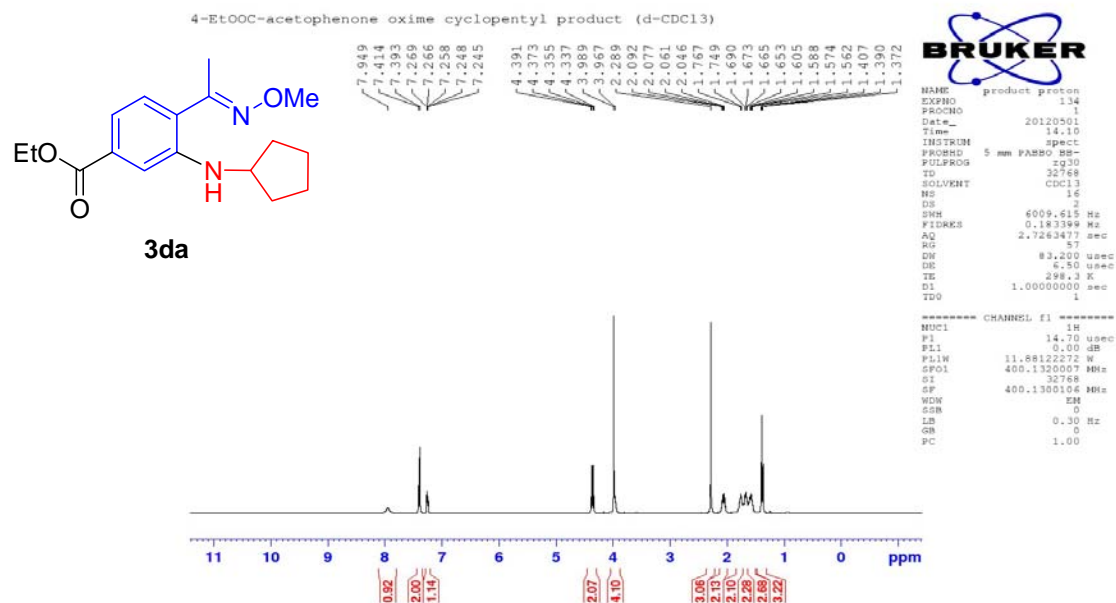

<sup>13</sup>C NMR spectrum of **3da**

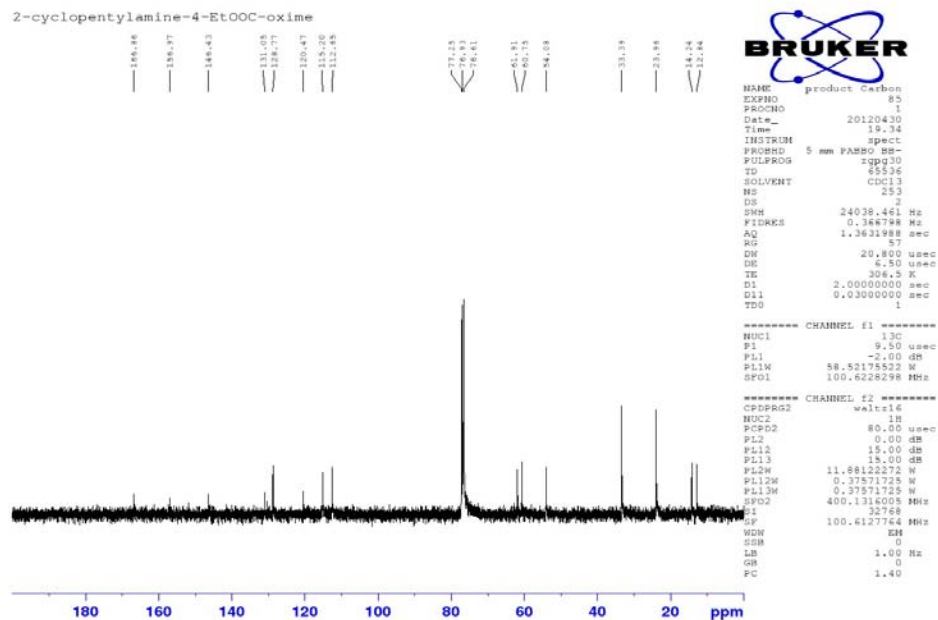

<sup>1</sup>H NMR spectrum of **3ea**

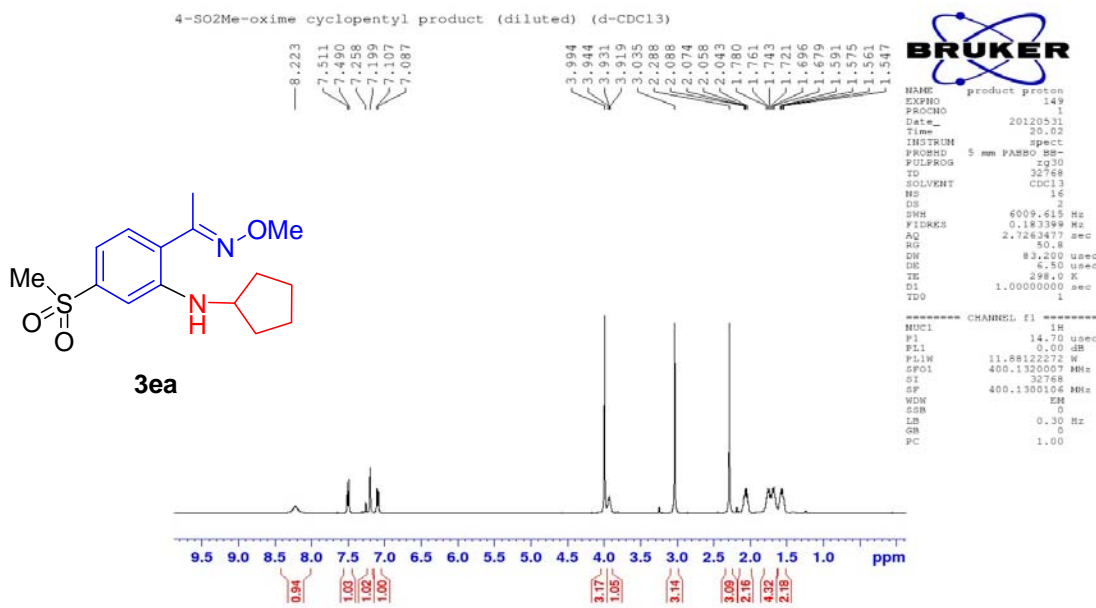

<sup>13</sup>C NMR spectrum of **3ea**

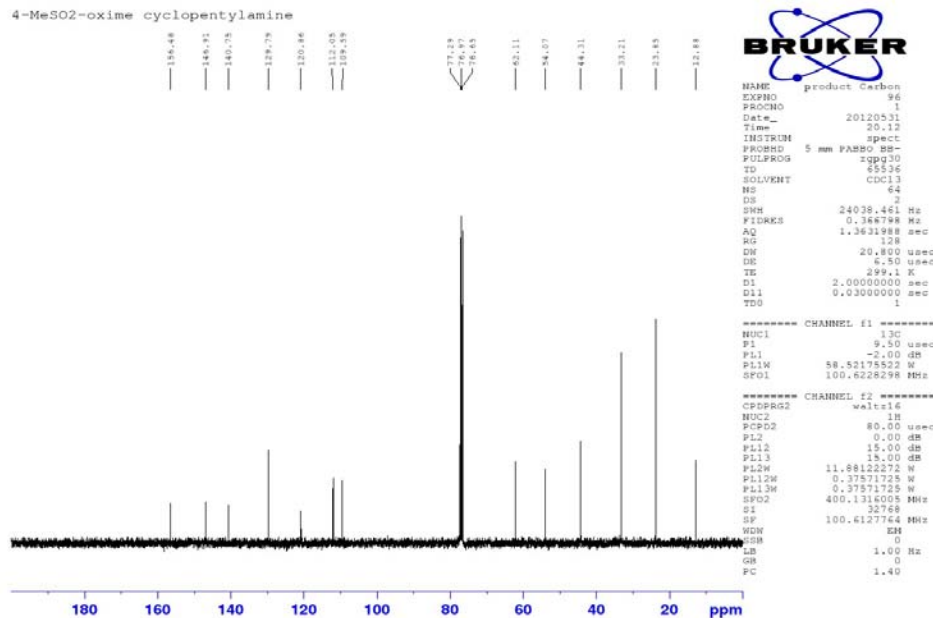

<sup>1</sup>H NMR spectrum of **3fa**

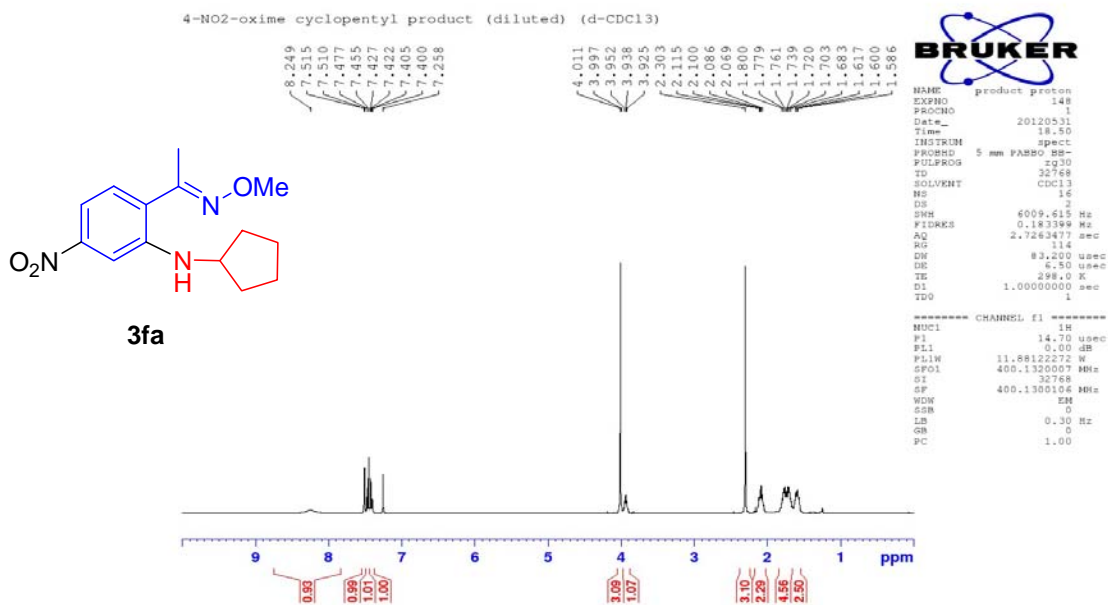

<sup>13</sup>C NMR spectrum of **3fa**

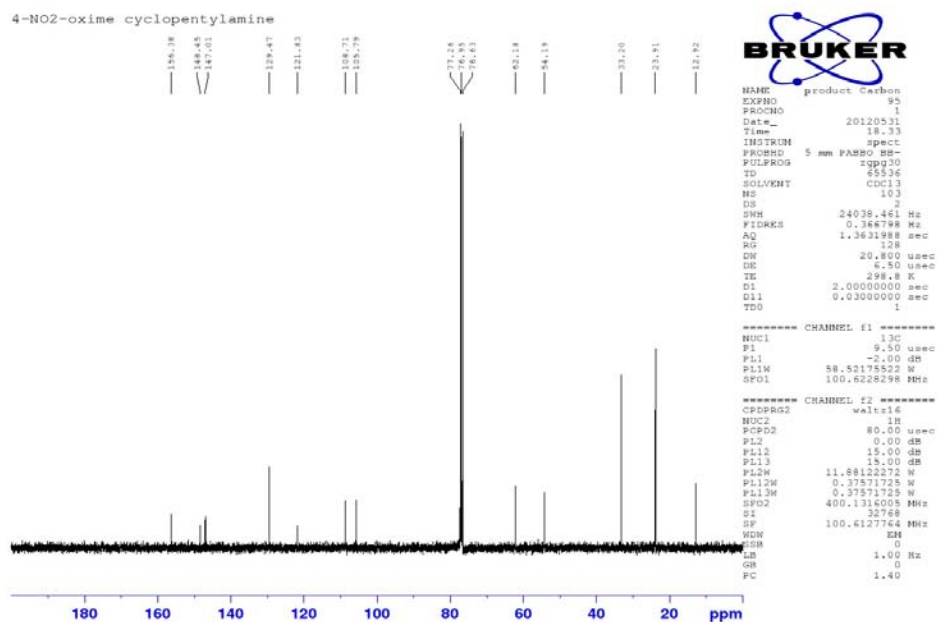

<sup>1</sup>H NMR spectrum of **3ga**

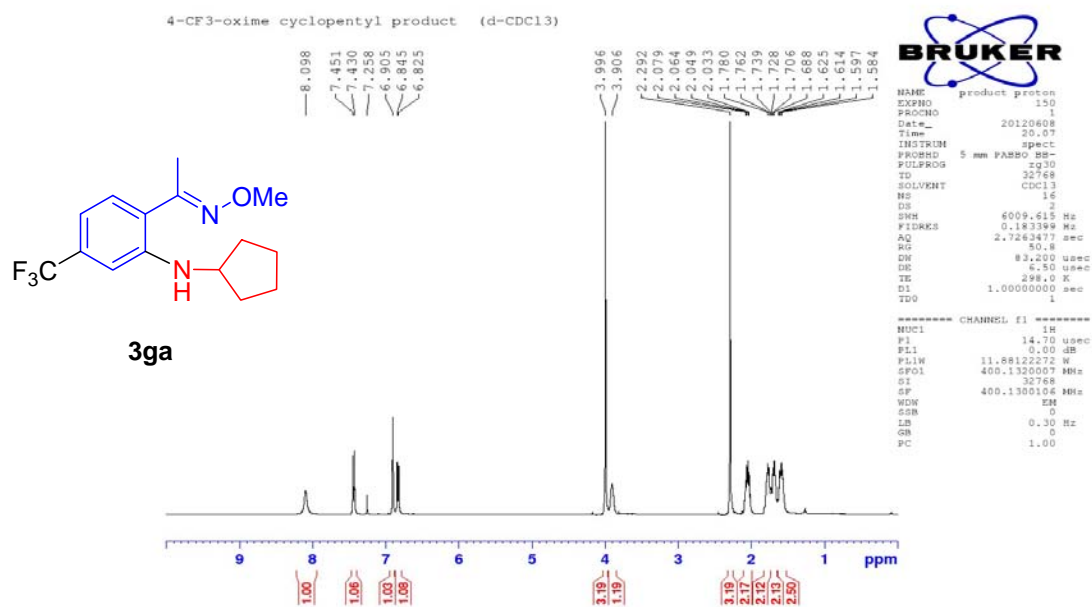

<sup>13</sup>C NMR spectrum of **3ga**

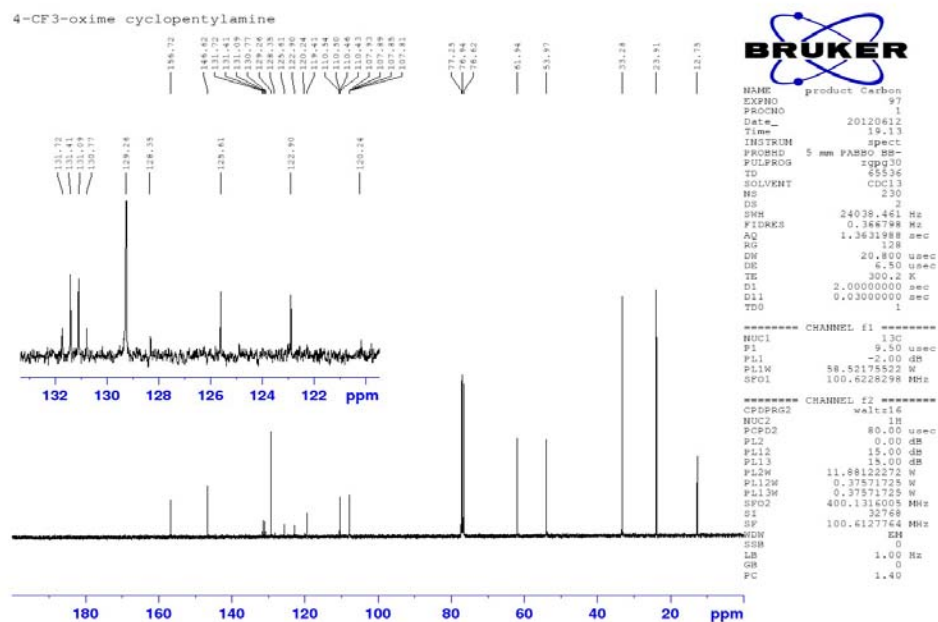

<sup>1</sup>H NMR spectrum of **3ha**

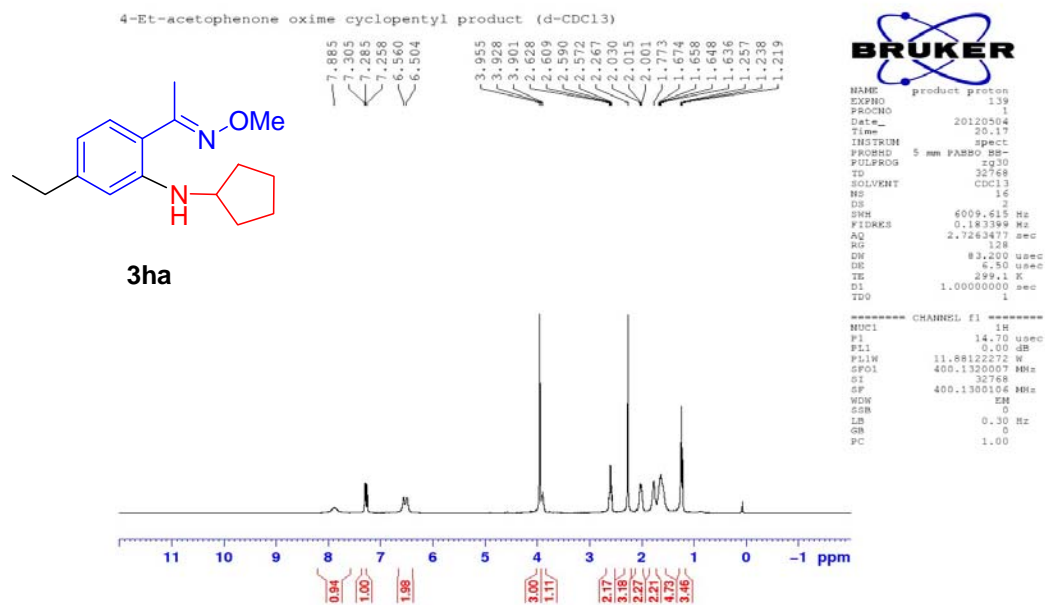

<sup>13</sup>C NMR spectrum of **3ha**

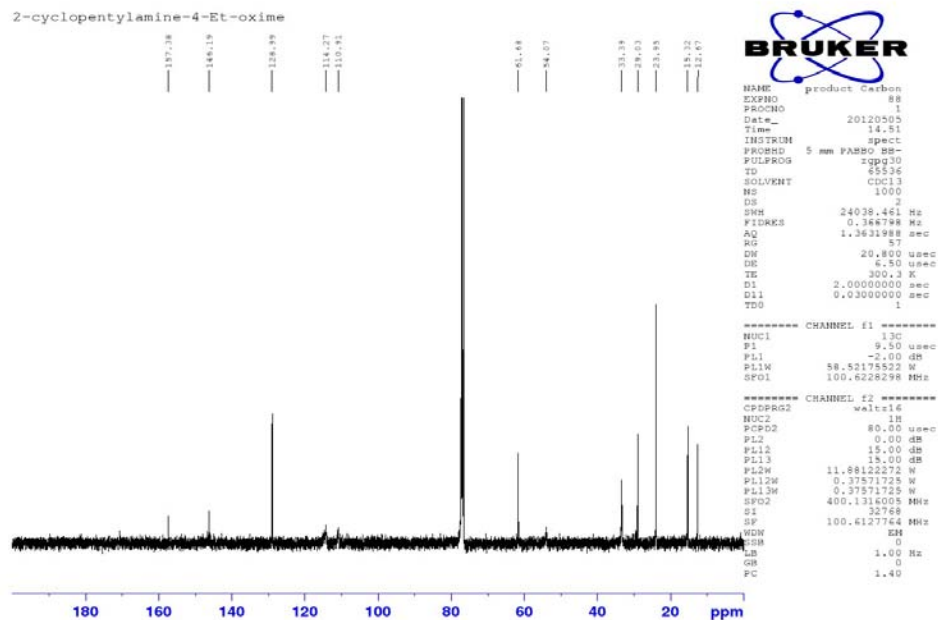

<sup>1</sup>H NMR spectrum of **3ia**

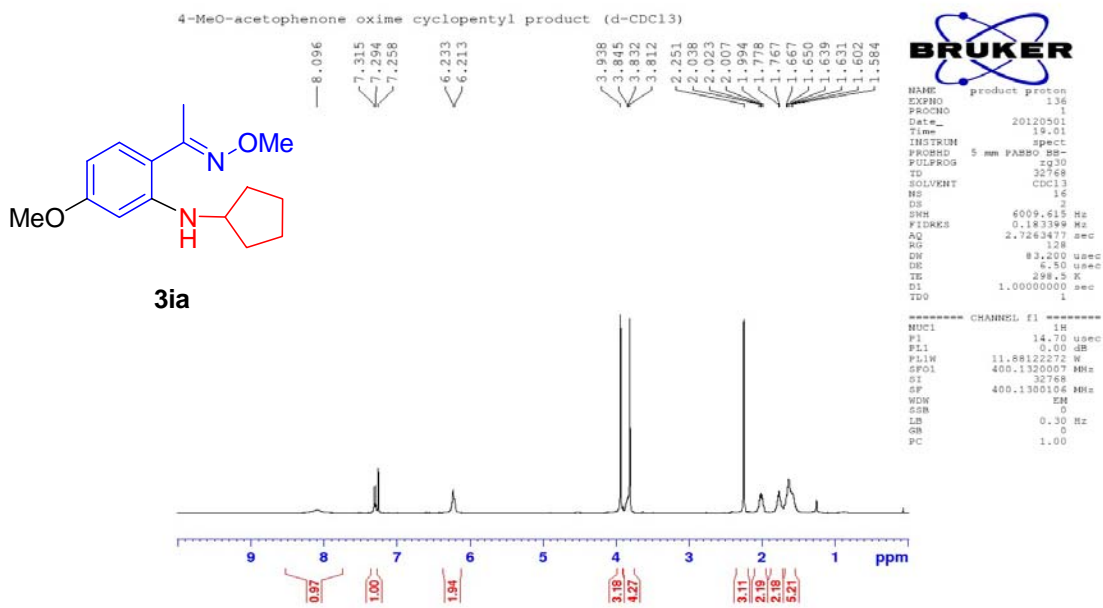

<sup>13</sup>C NMR spectrum of **3ia**

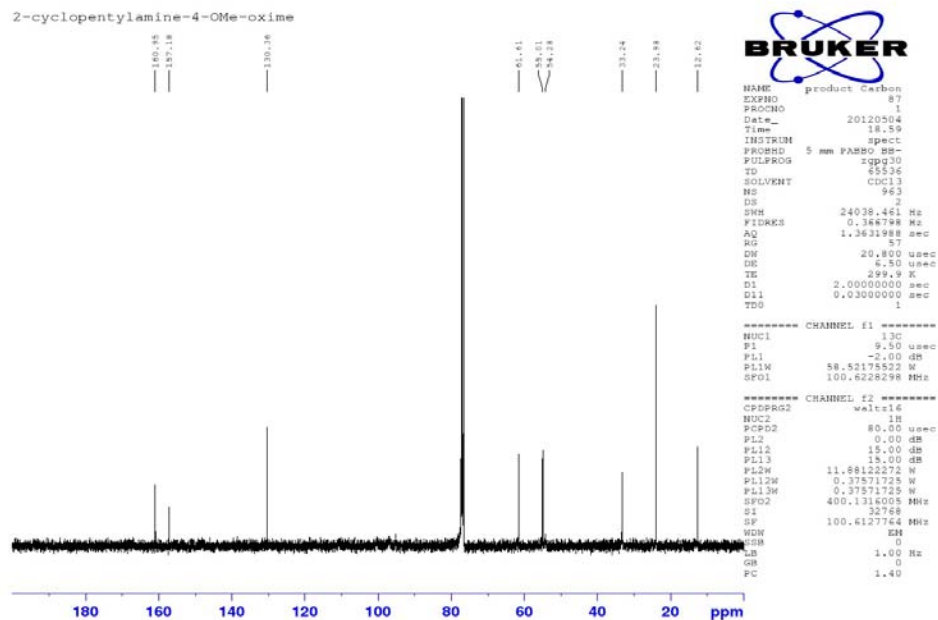

<sup>1</sup>H NMR spectrum of **3ja**

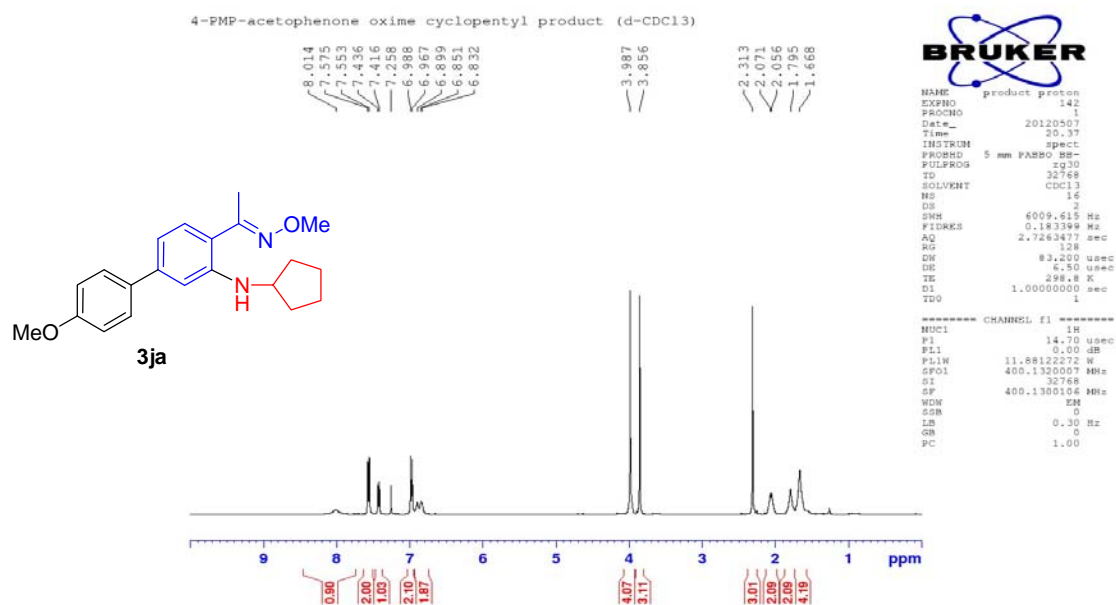

<sup>13</sup>C NMR spectrum of **3ja**

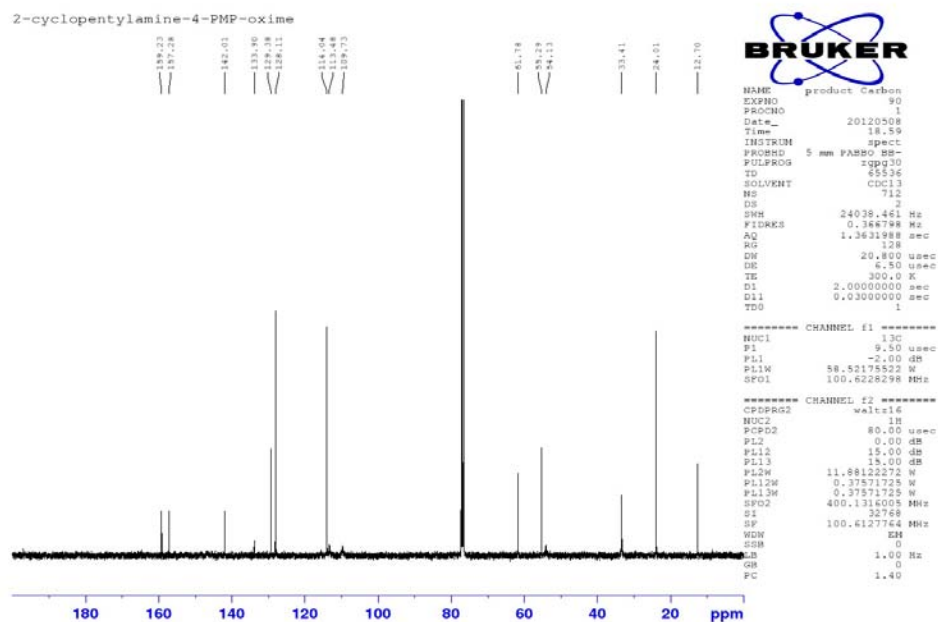

<sup>1</sup>H NMR spectrum of **3ka**



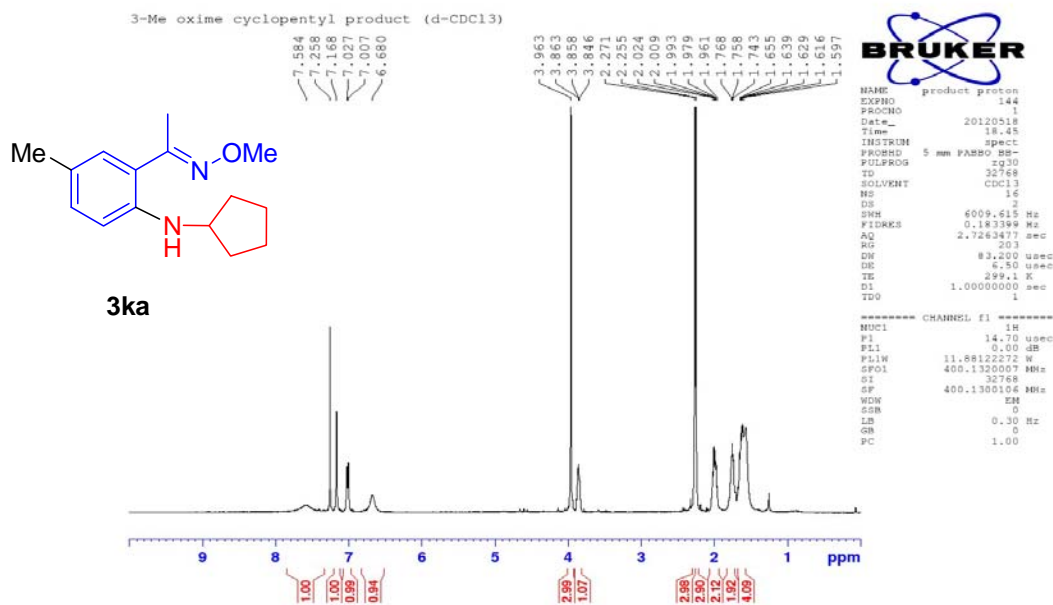

<sup>13</sup>C NMR spectrum of 3ka

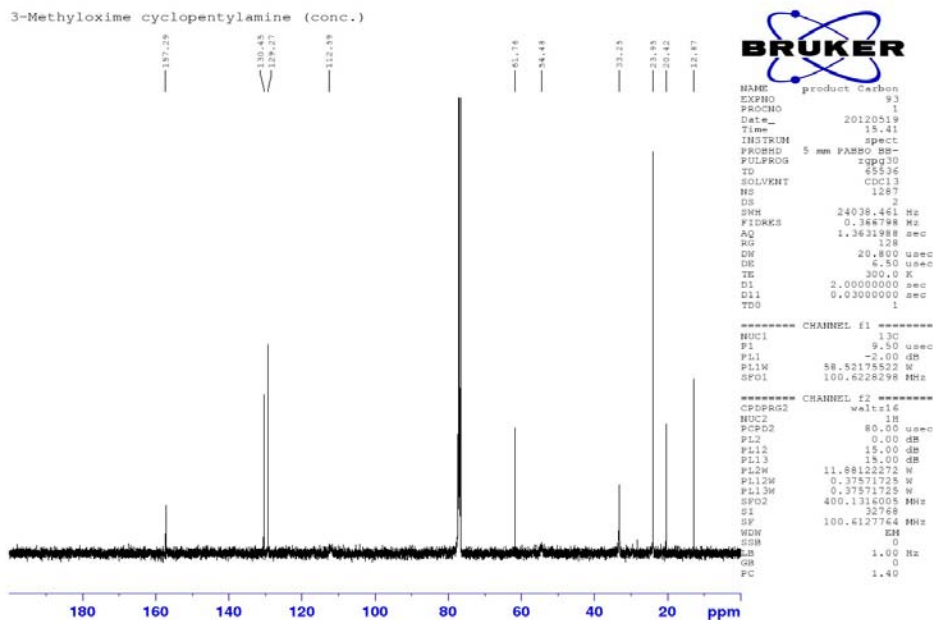

<sup>1</sup>H NMR spectrum of 3la

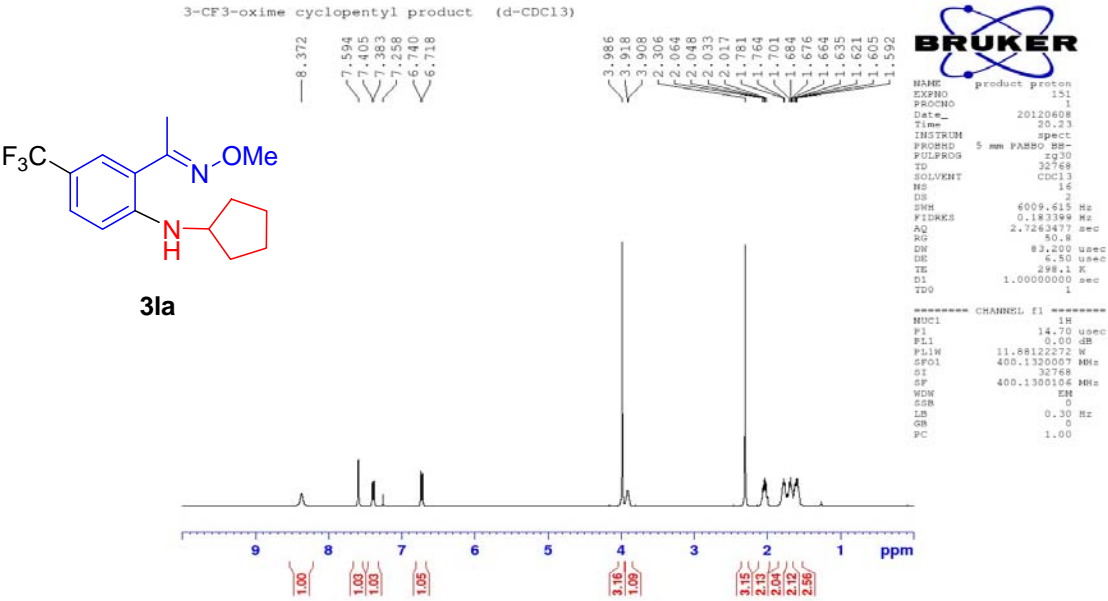

<sup>13</sup>C NMR spectrum of **3la**

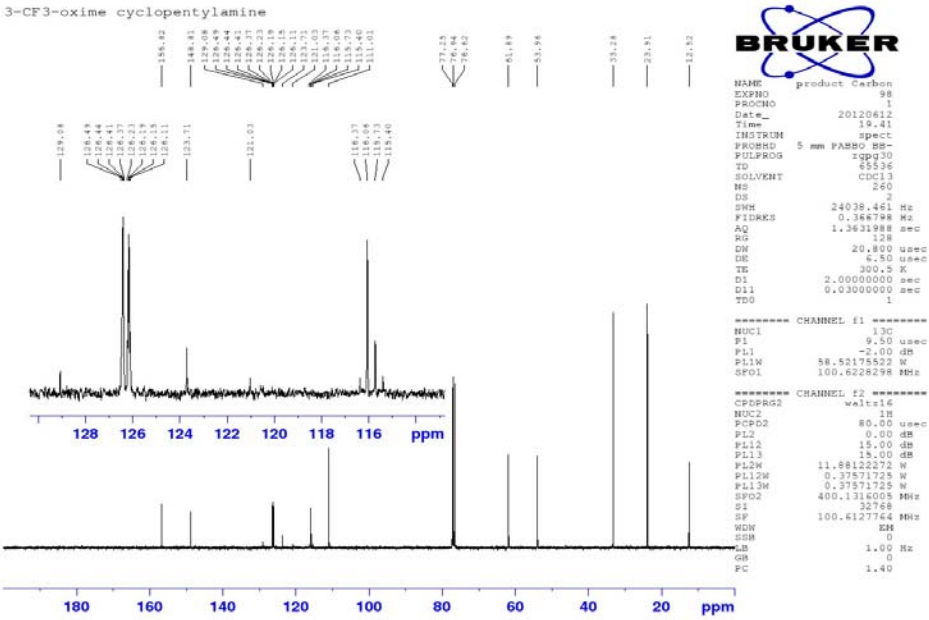

<sup>1</sup>H NMR spectrum of **3na-3Cl**

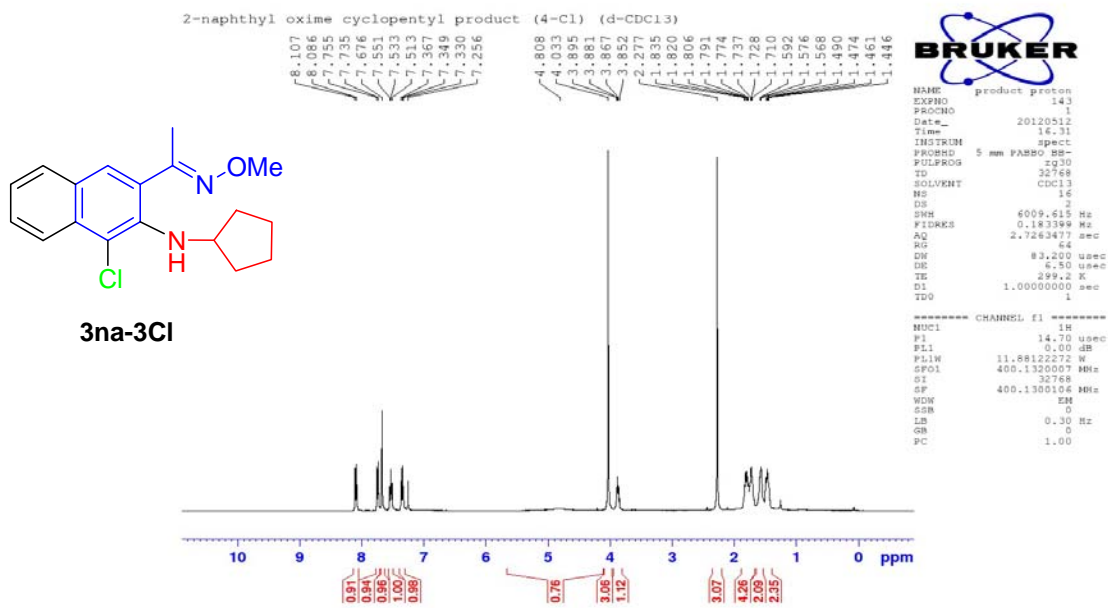

<sup>13</sup>C NMR spectrum of **3na-3Cl**

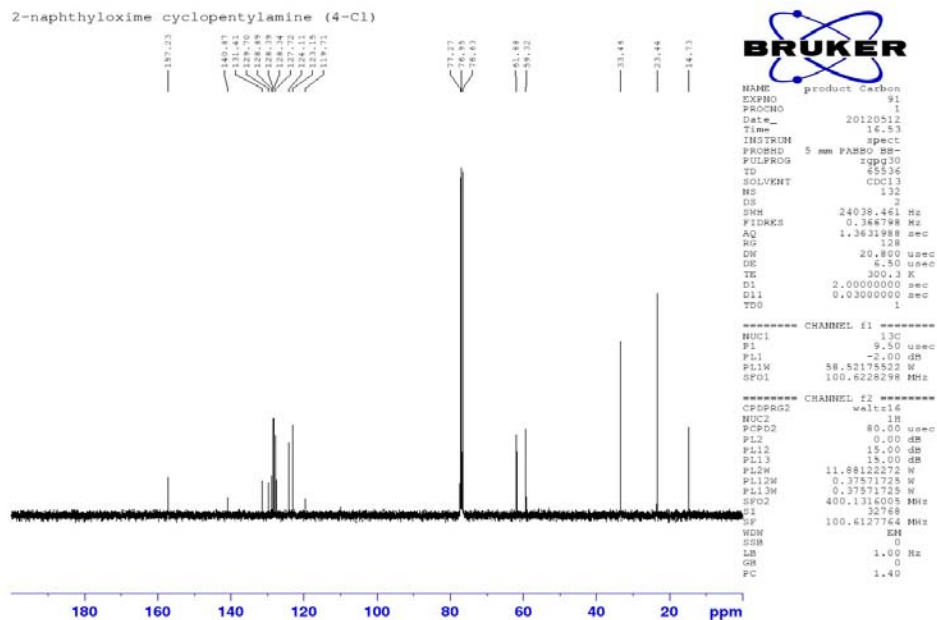

COSY NMR spectra of **3na-3Cl**

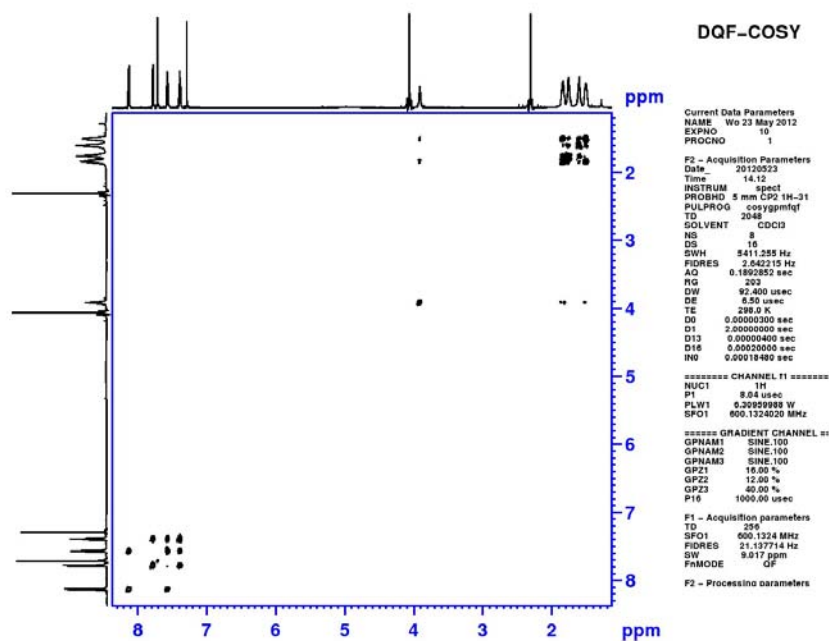

(Original)

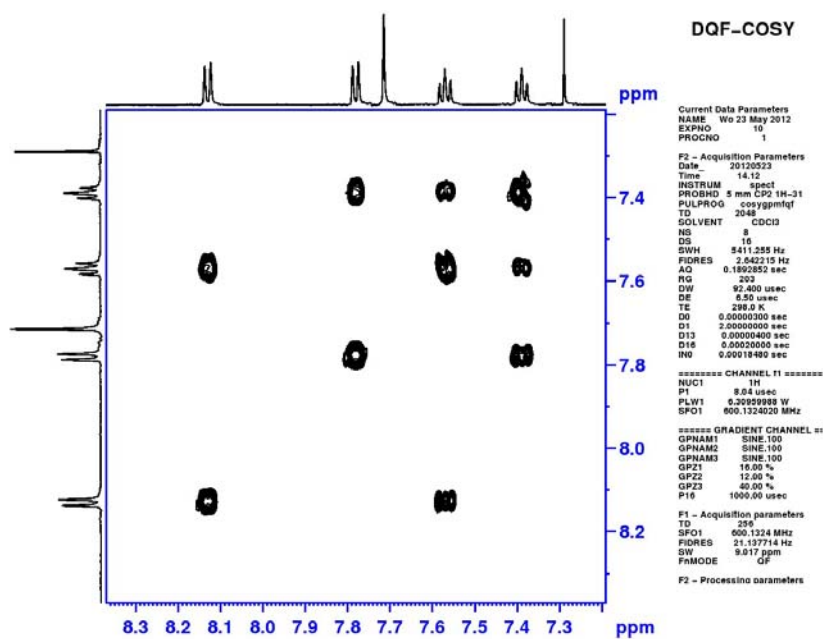

(Magnified at 8.4-7.2 ppm)

NOSY NMR spectrum of **3na-3Cl**

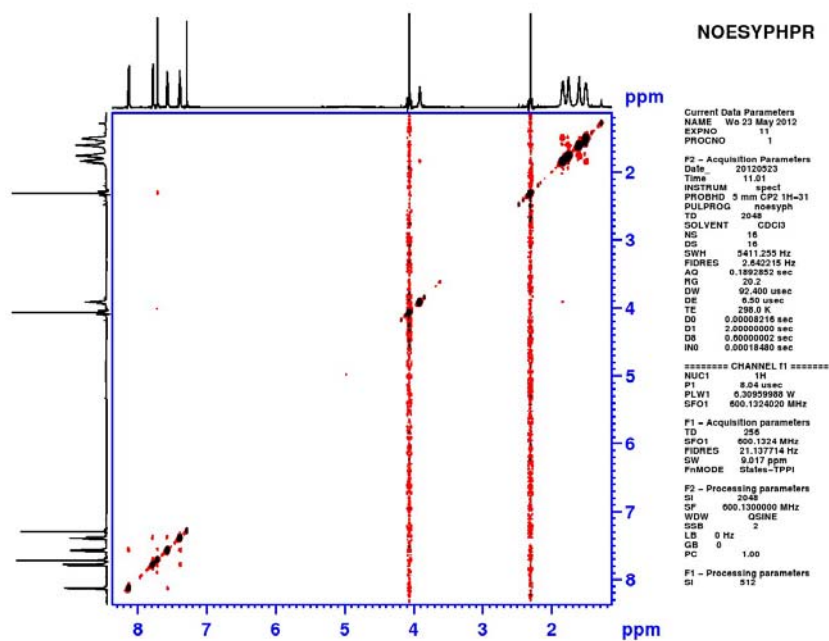

(Original)

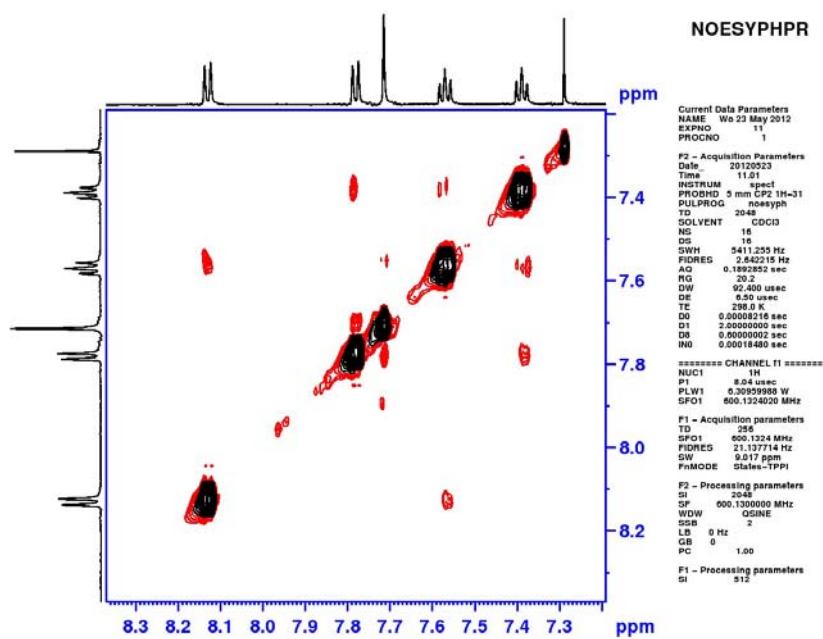

(Magnified at 8.4-7.2 ppm)

$^1\text{H}$  NMR spectrum of **30a**

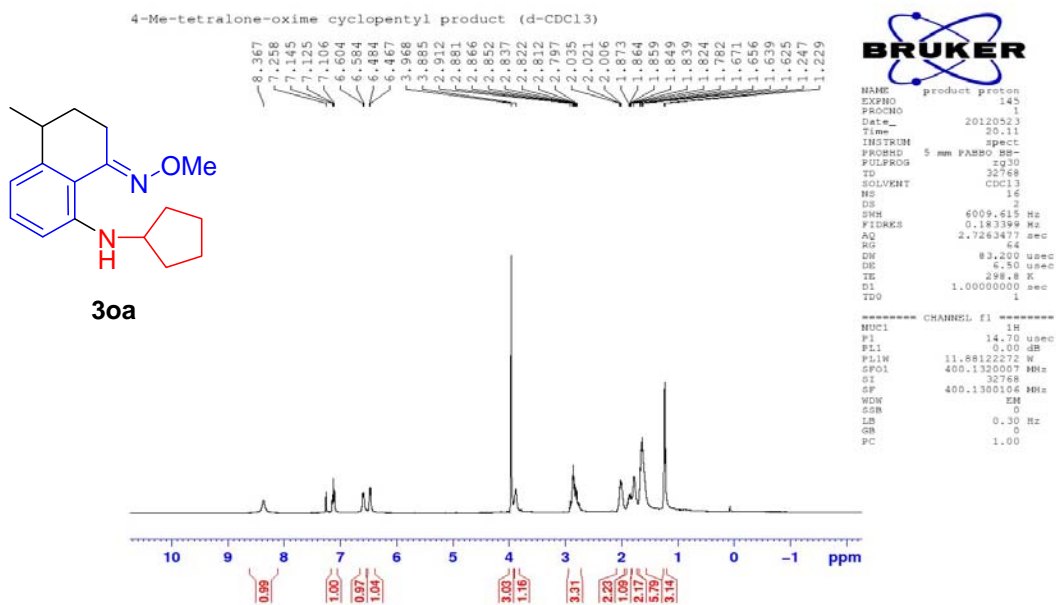

<sup>13</sup>C NMR spectrum of **30a**

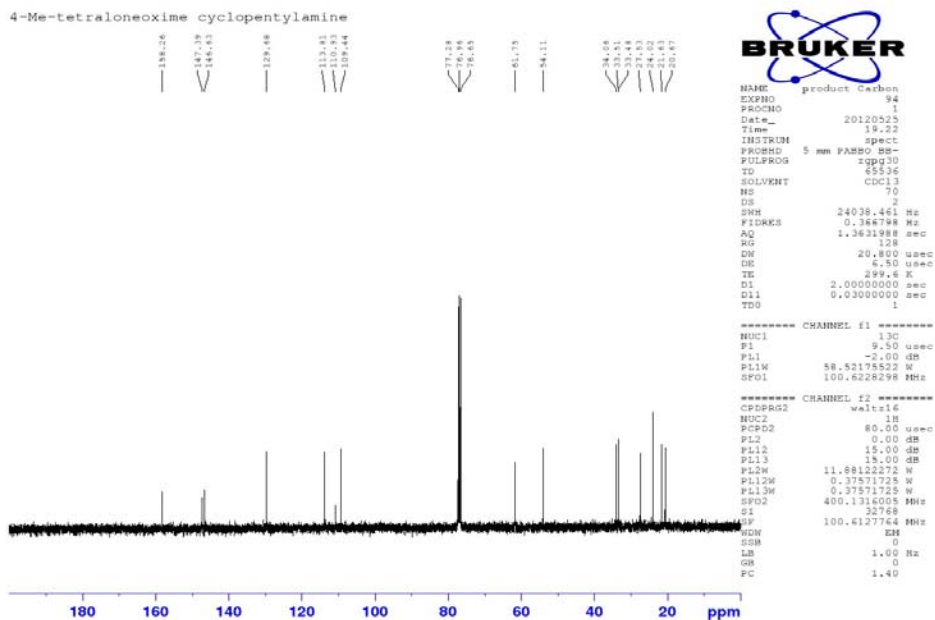

<sup>1</sup>H NMR spectrum of **3fb**

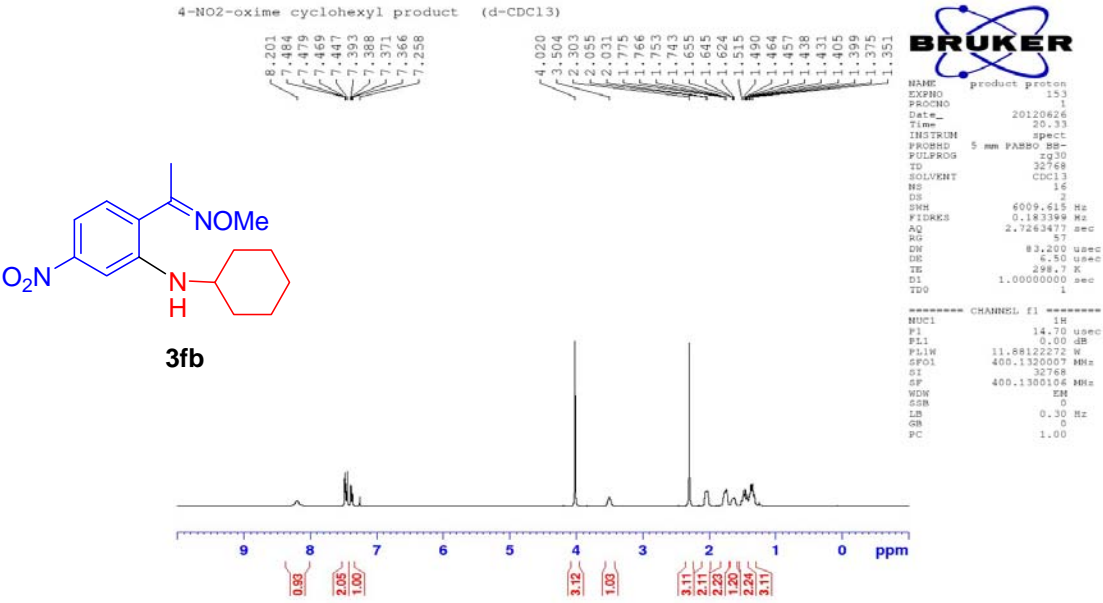

<sup>13</sup>C NMR spectrum of **3fb**

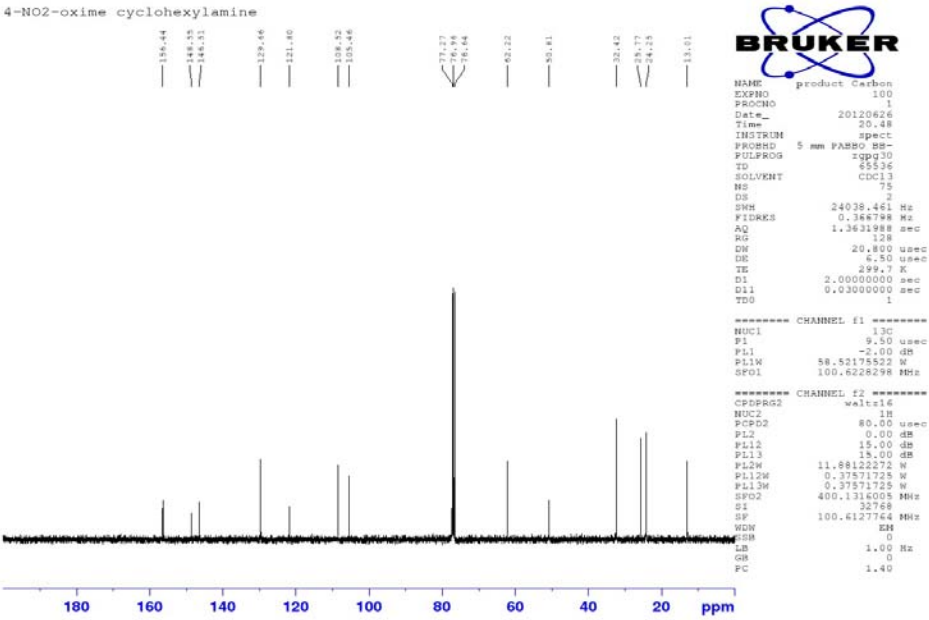

<sup>1</sup>H NMR spectrum of **3fc**



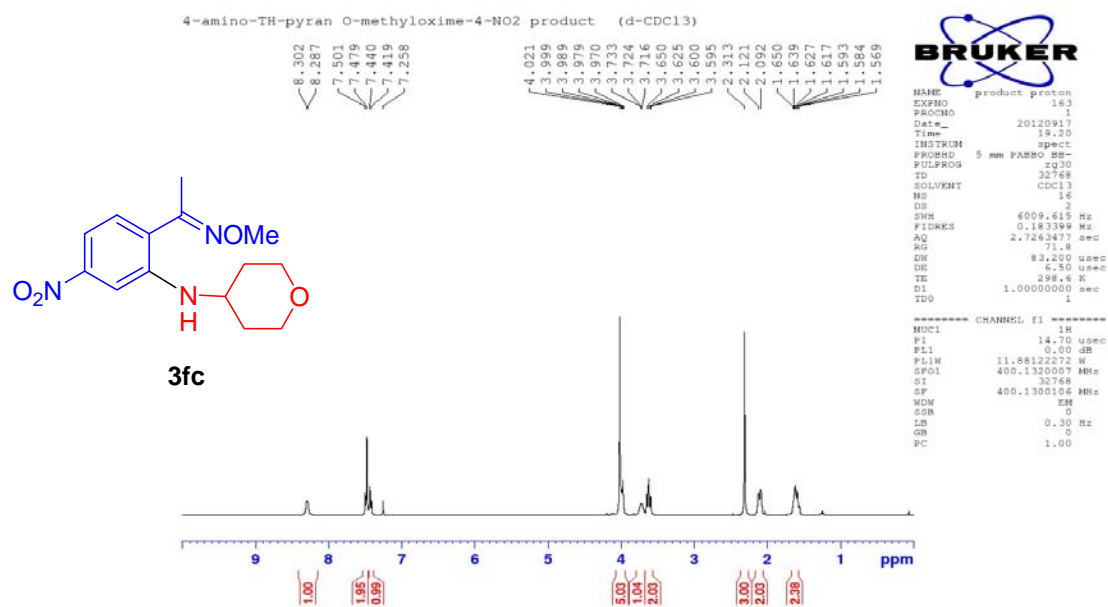

<sup>13</sup>C NMR spectrum of **3fc**

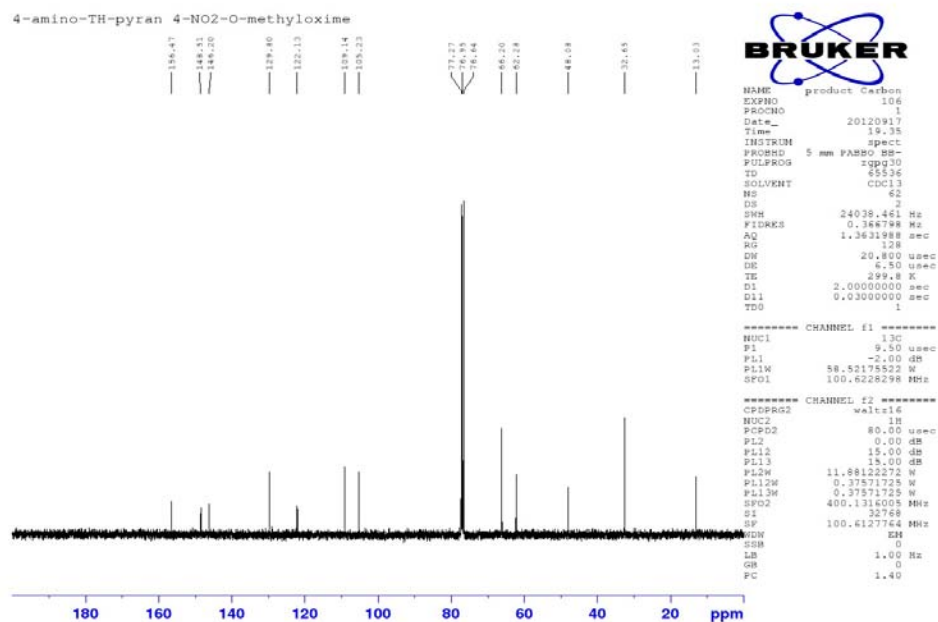

<sup>1</sup>H NMR spectrum of **3fd**

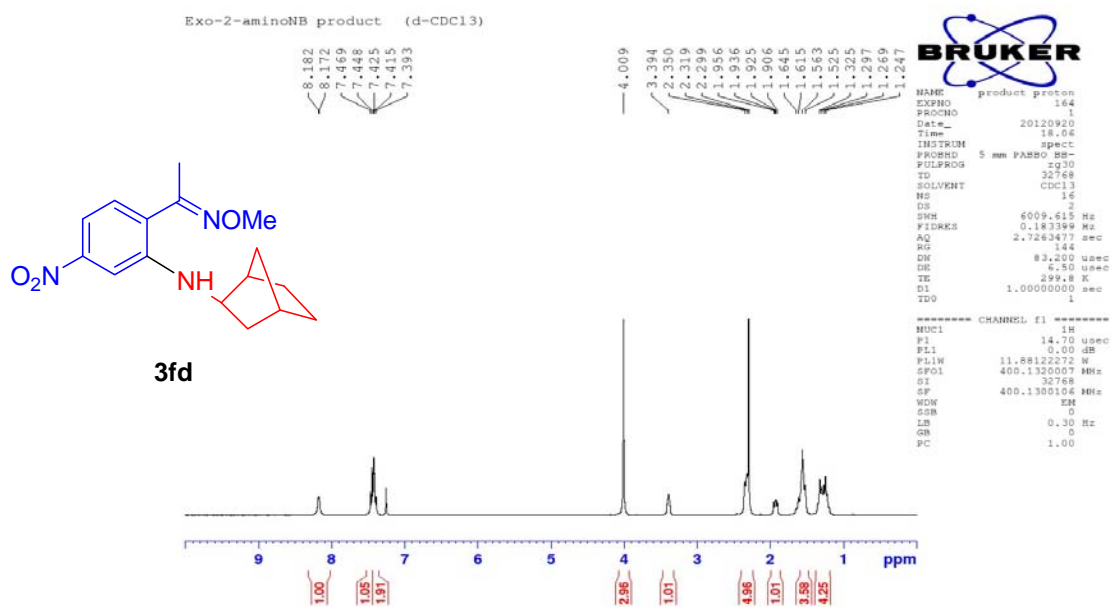

<sup>13</sup>C NMR spectrum of **3fd**

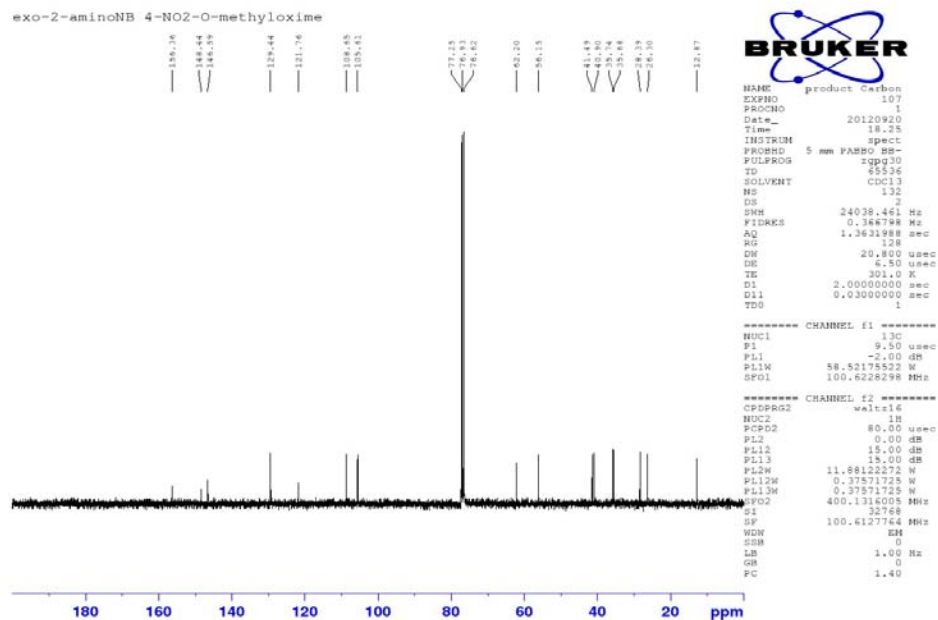

<sup>1</sup>H NMR spectrum of **3fe**

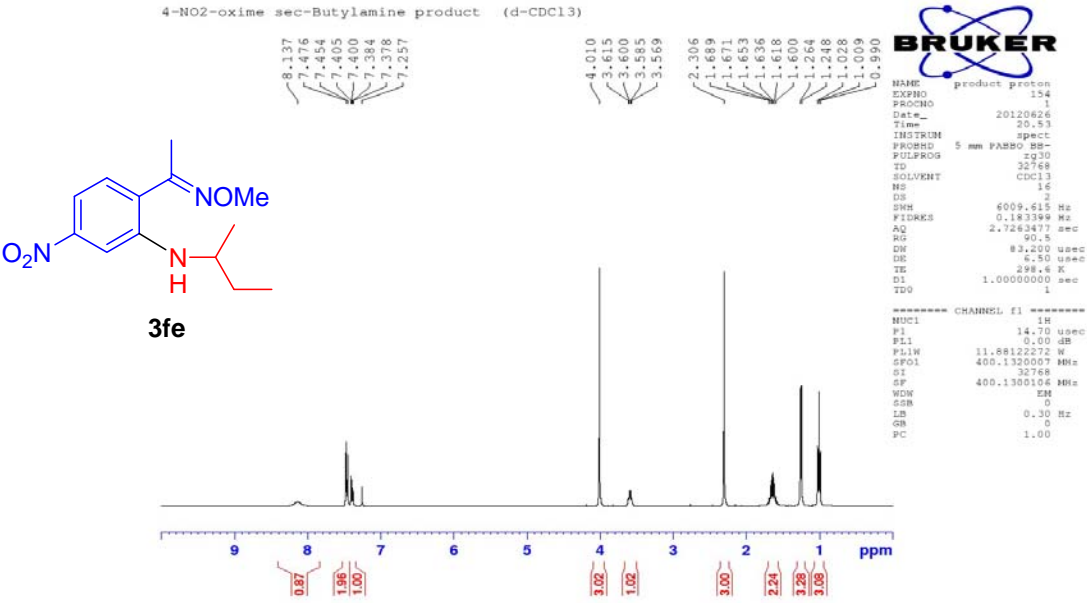

<sup>13</sup>C NMR spectrum of 3fe

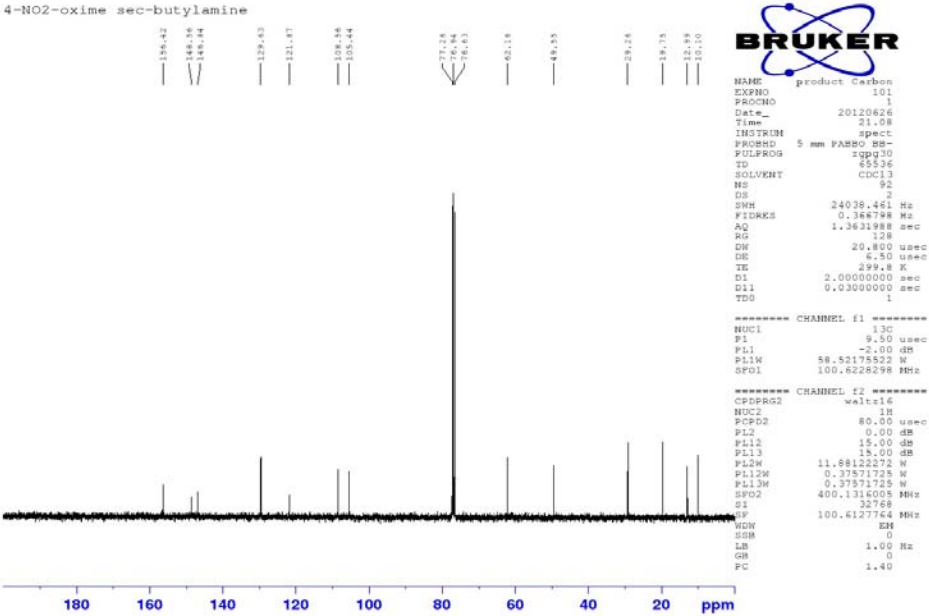

<sup>1</sup>H NMR spectrum of 3ff

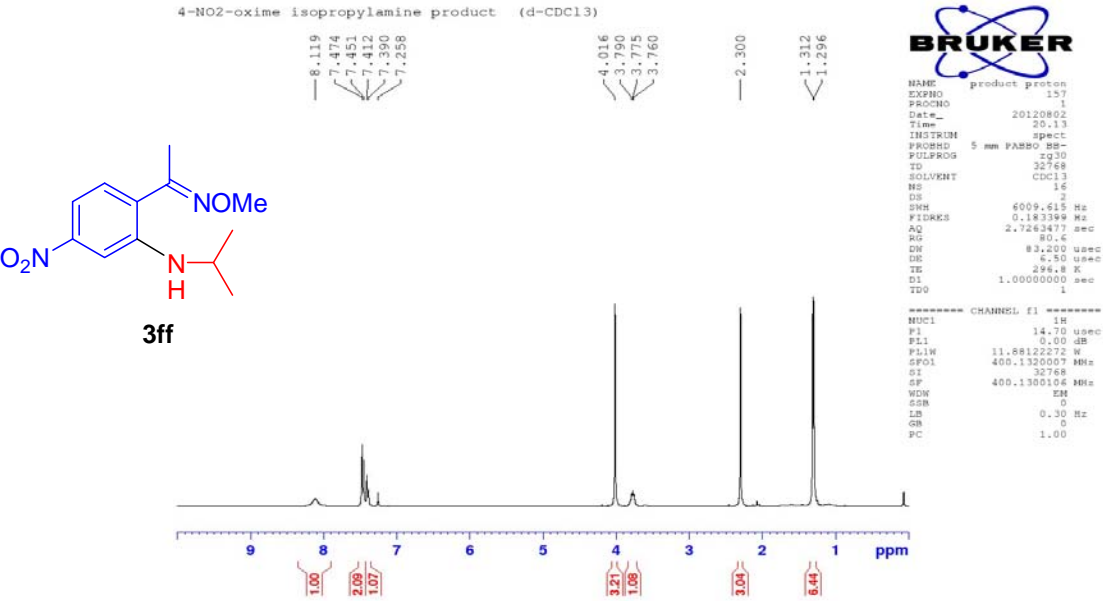

<sup>13</sup>C NMR spectrum of **3ff**

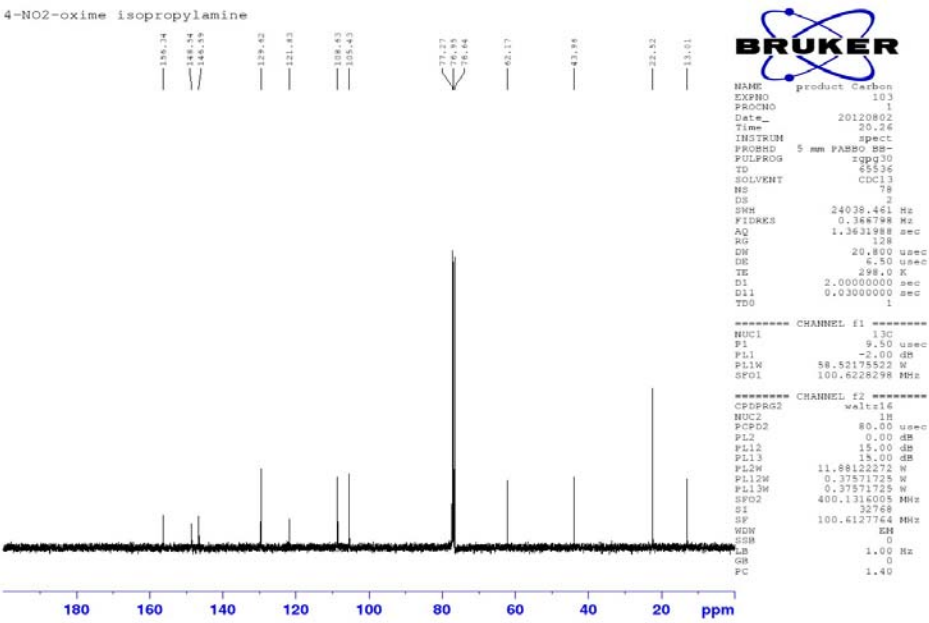

<sup>1</sup>H NMR spectrum of **3ag**

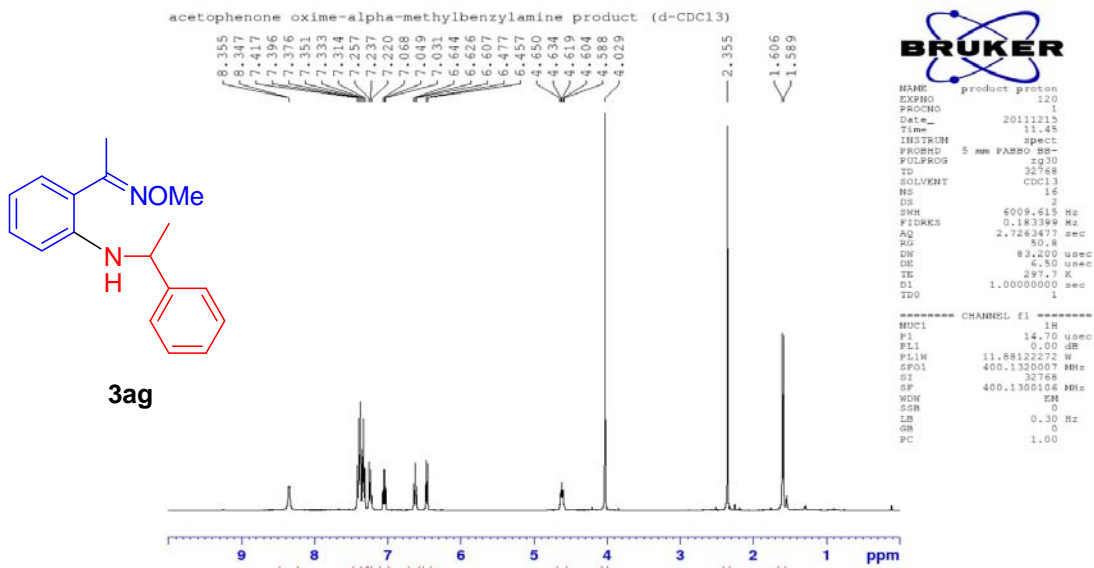

<sup>13</sup>C NMR spectrum of **3ag**

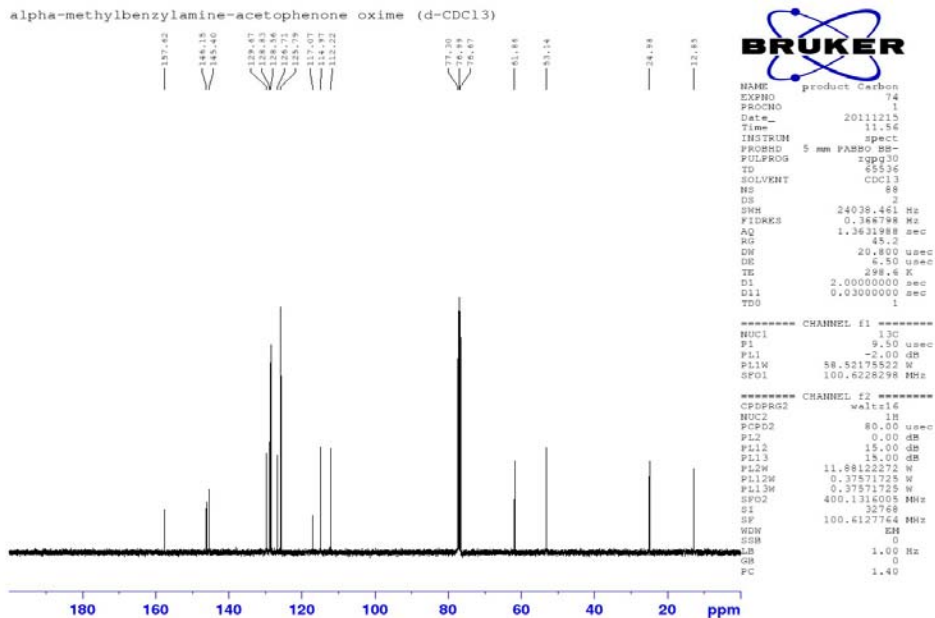

<sup>1</sup>H NMR spectrum of **3fh**

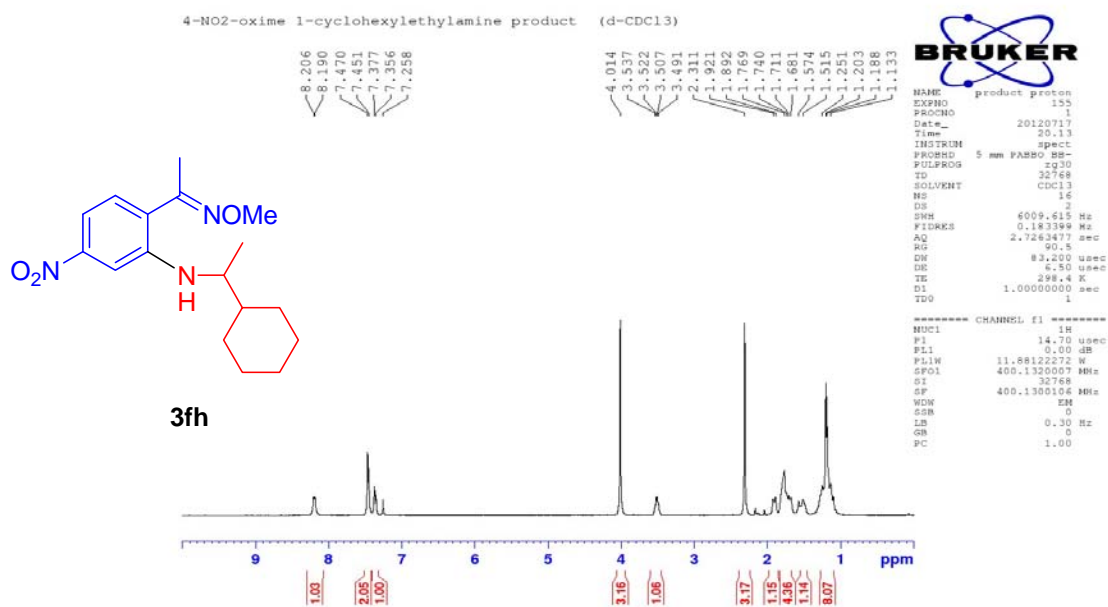

<sup>13</sup>C NMR spectrum of **3fh**

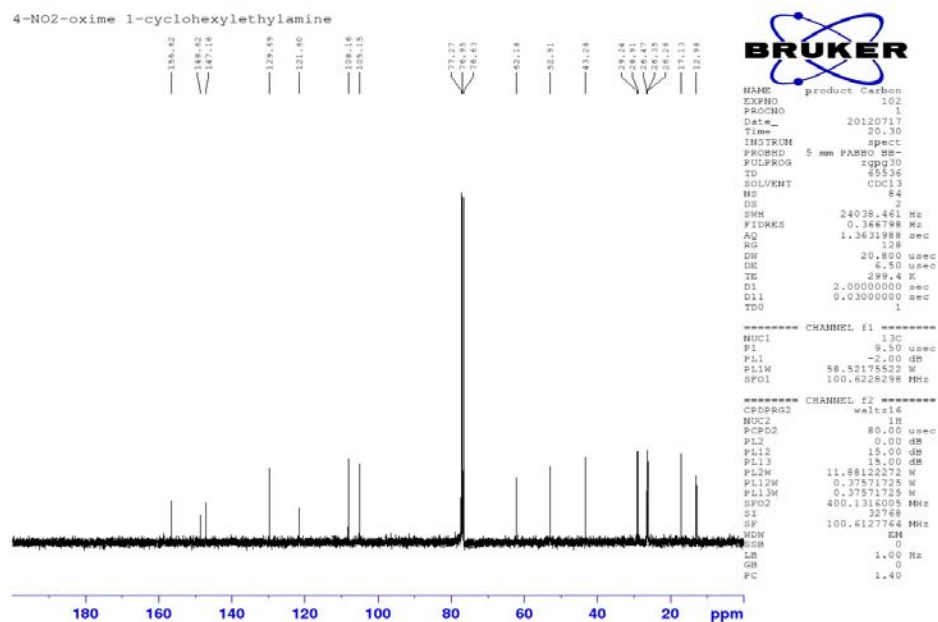

<sup>1</sup>H NMR spectrum of **3mi**

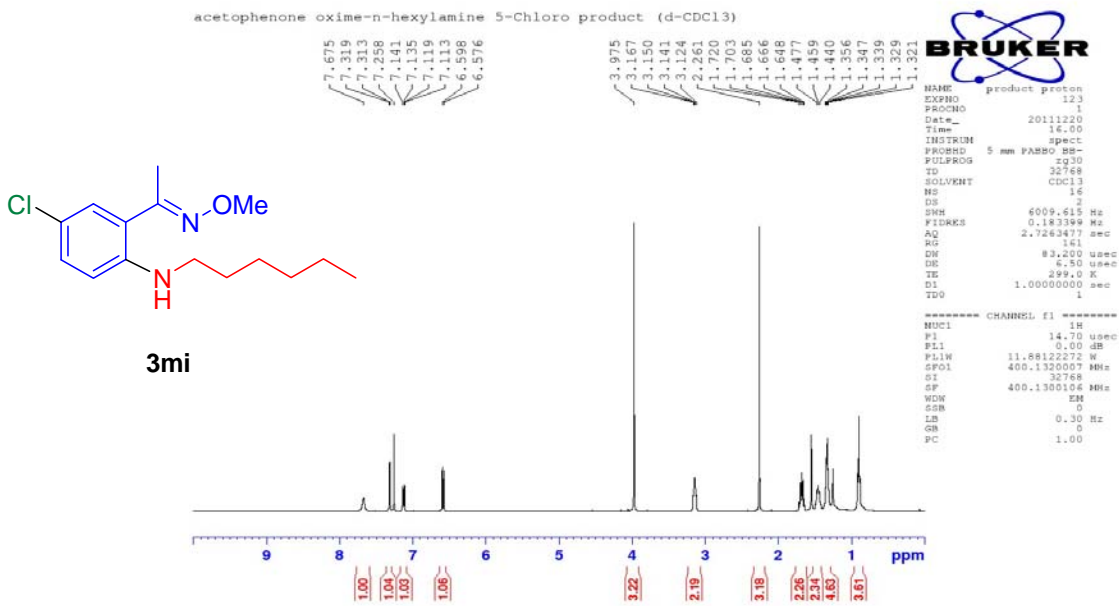

<sup>13</sup>C NMR spectrum of **3mi**

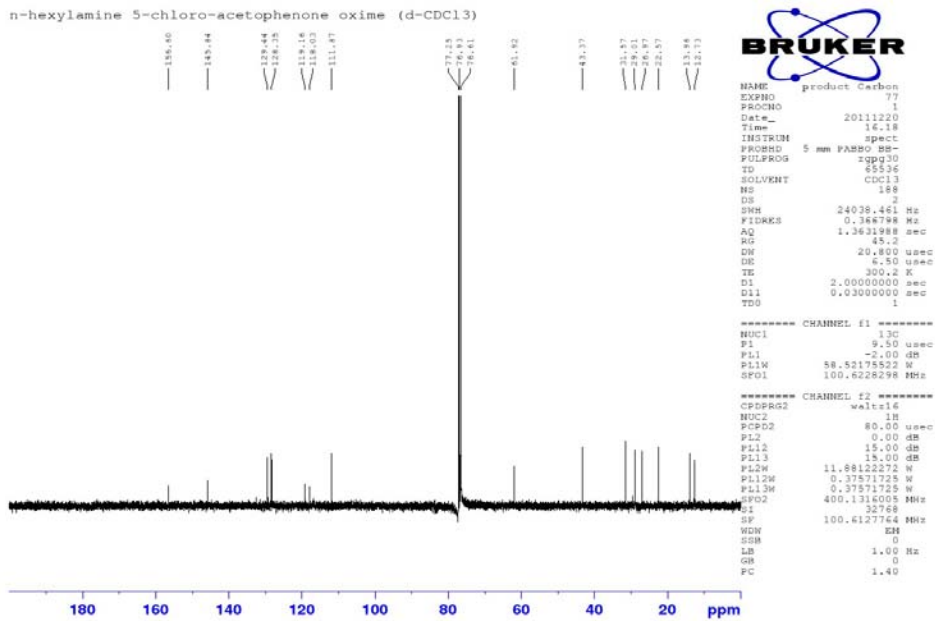

<sup>1</sup>H NMR spectrum of **3mi'**



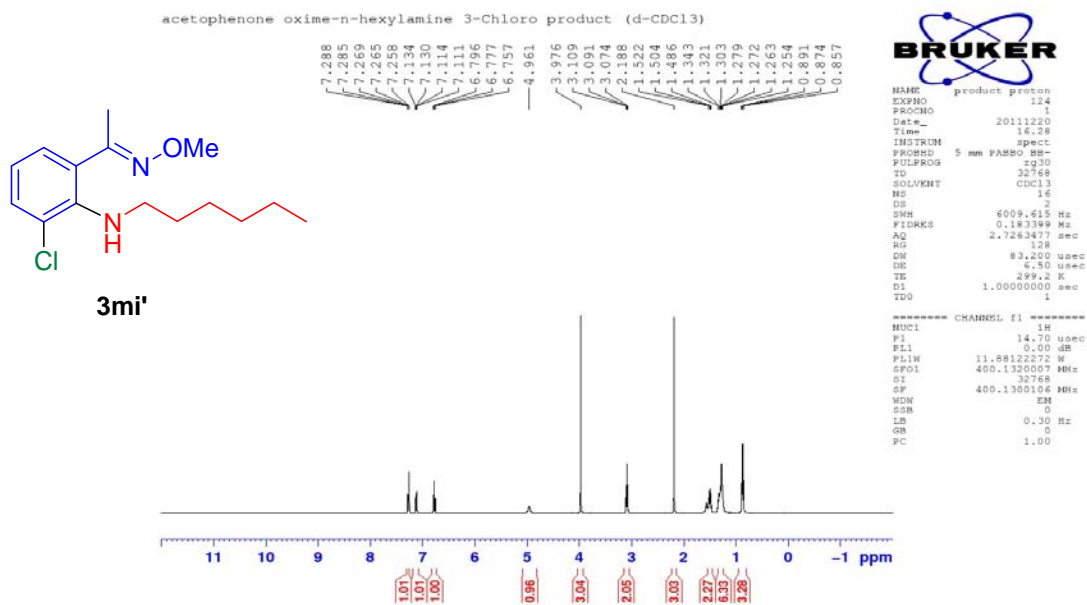

<sup>13</sup>C NMR spectrum of **3mi'**

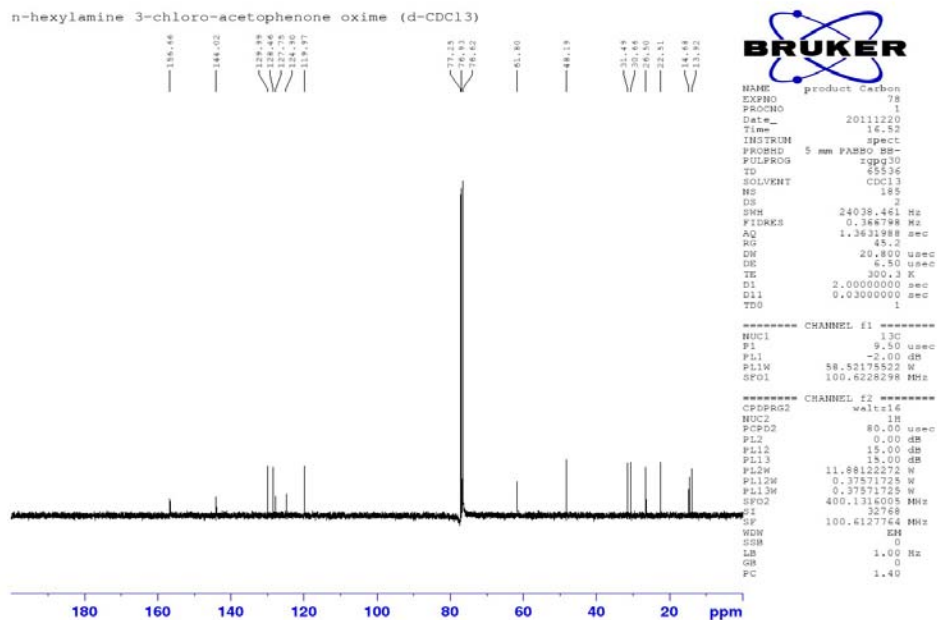

<sup>1</sup>H NMR spectrum of **3ai-DiCl**

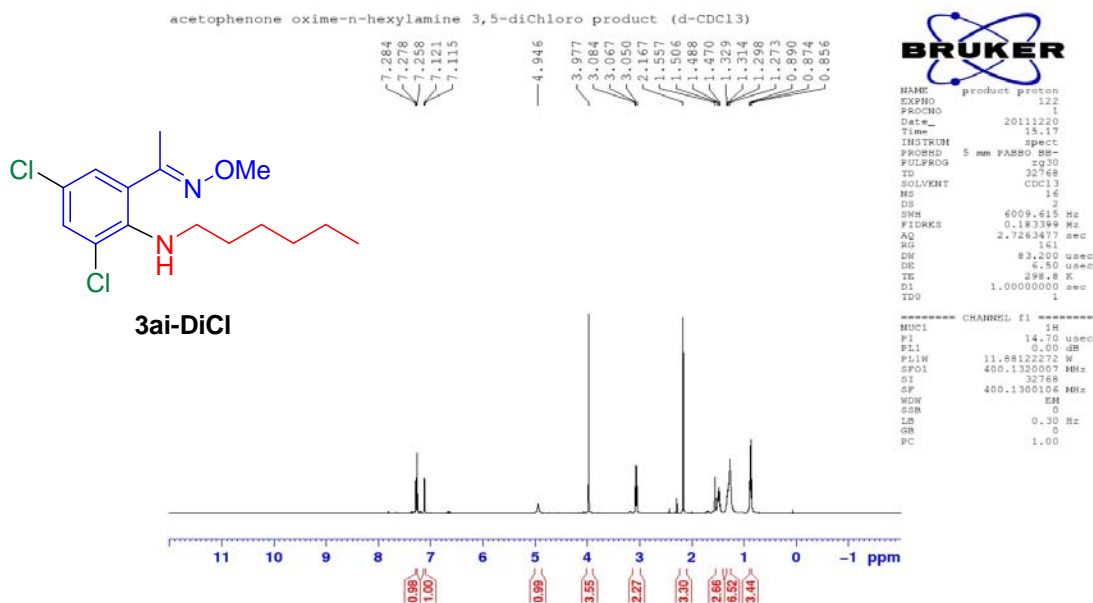

<sup>13</sup>C NMR spectrum of **3ai-DiCl**

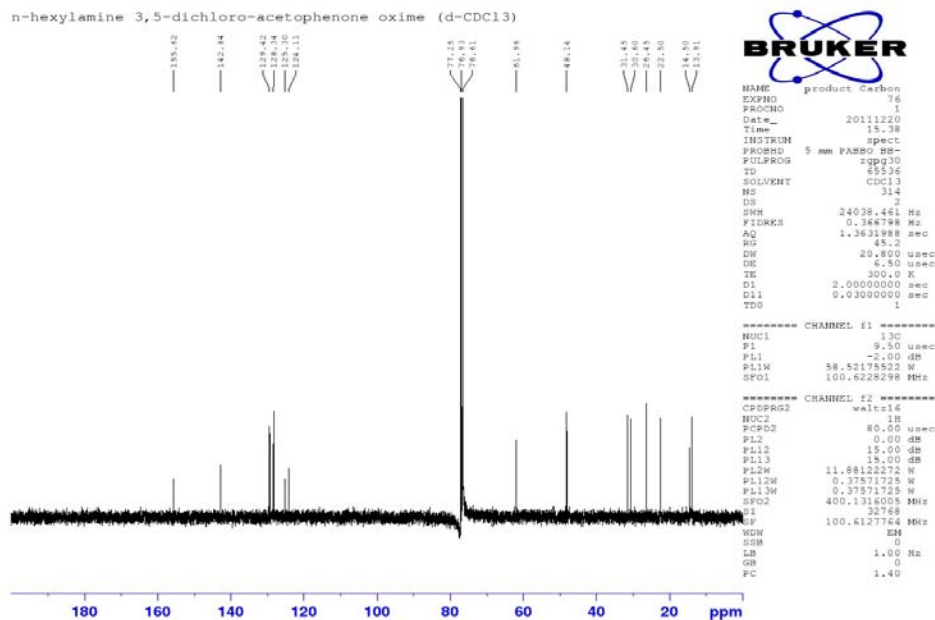

<sup>1</sup>H NMR spectrum of *N*-cyclopentyl-2-(pyridin-2-yl)aniline

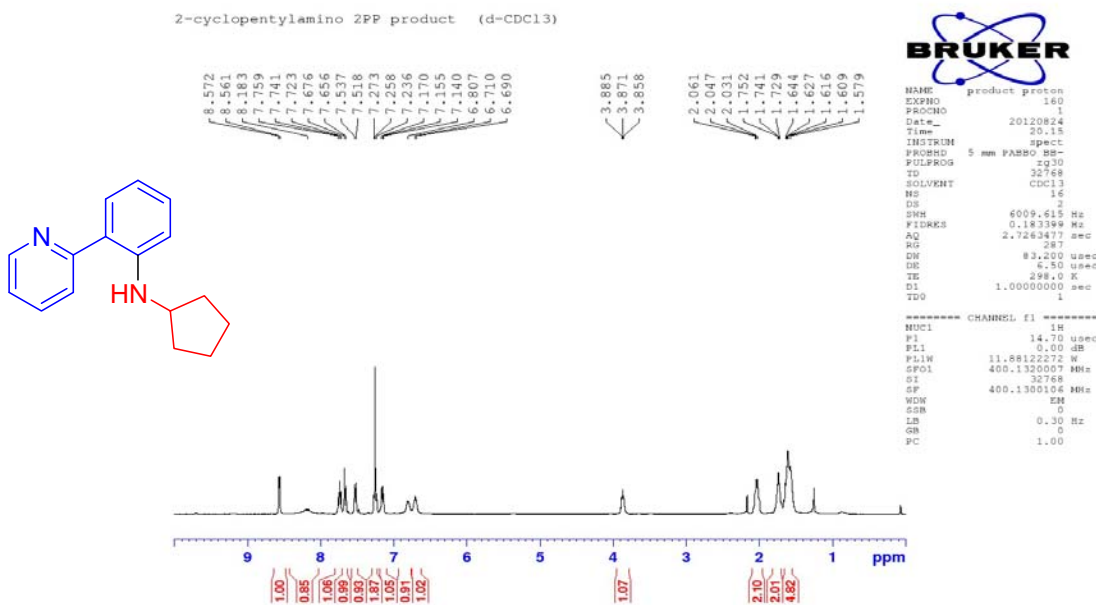

<sup>13</sup>C NMR spectrum of *N*-cyclopentyl-2-(pyridin-2-yl)aniline

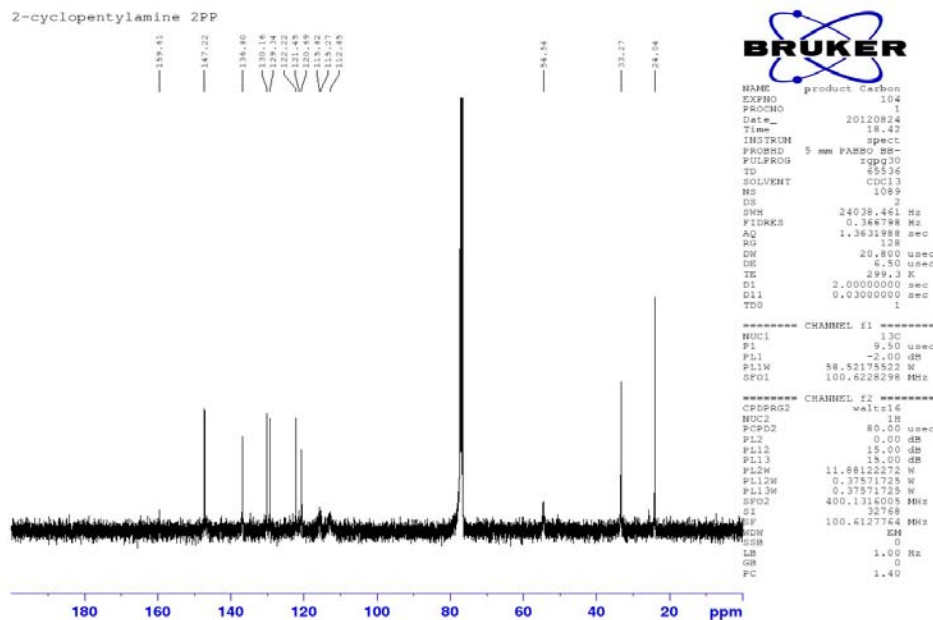

<sup>1</sup>H NMR spectrum of tetrahydro-*N*-(2-(pyridin-2-yl)phenyl)-2H-pyran-4-amine

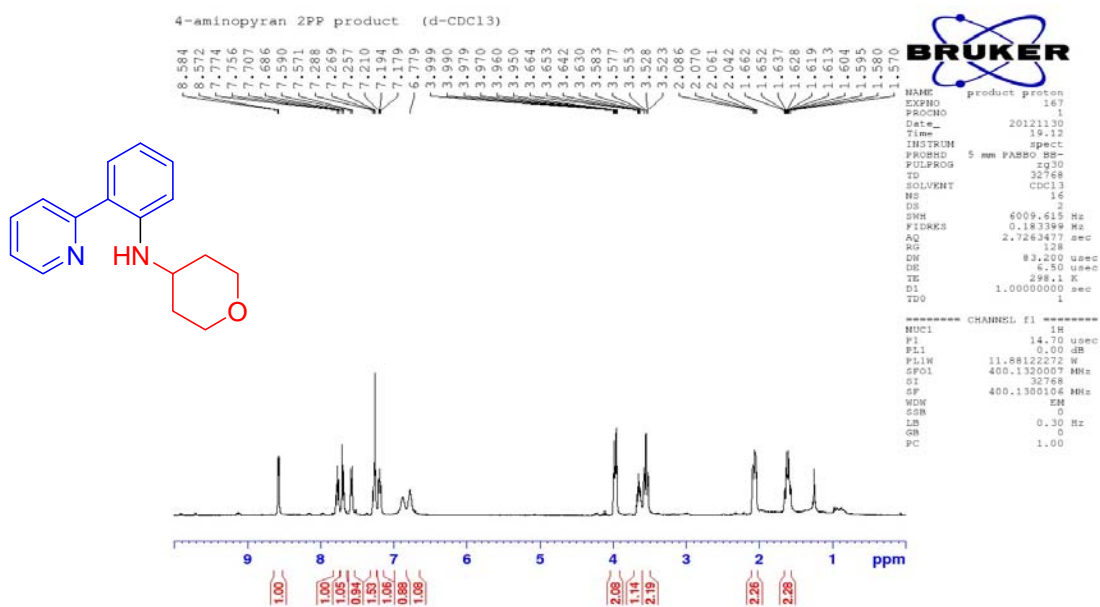

$^{13}\text{C}$  NMR spectrum of tetrahydro-*N*-(2-(pyridin-2-yl)phenyl)-2H-pyran-4-amine

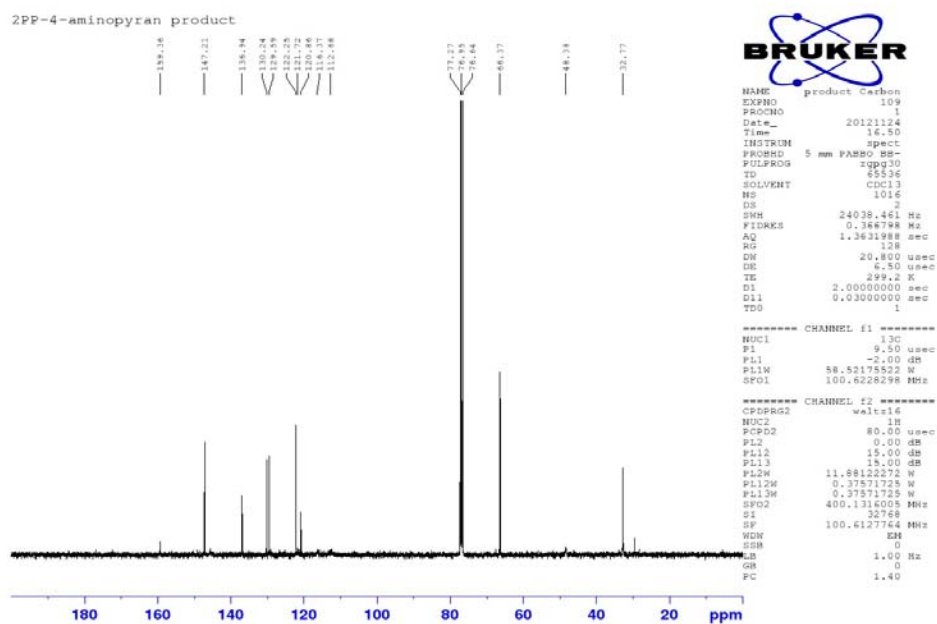

$^1\text{H}$  NMR spectrum of *N*-(1-cyclohexylethyl)-2-(pyridin-2-yl)benzenamine

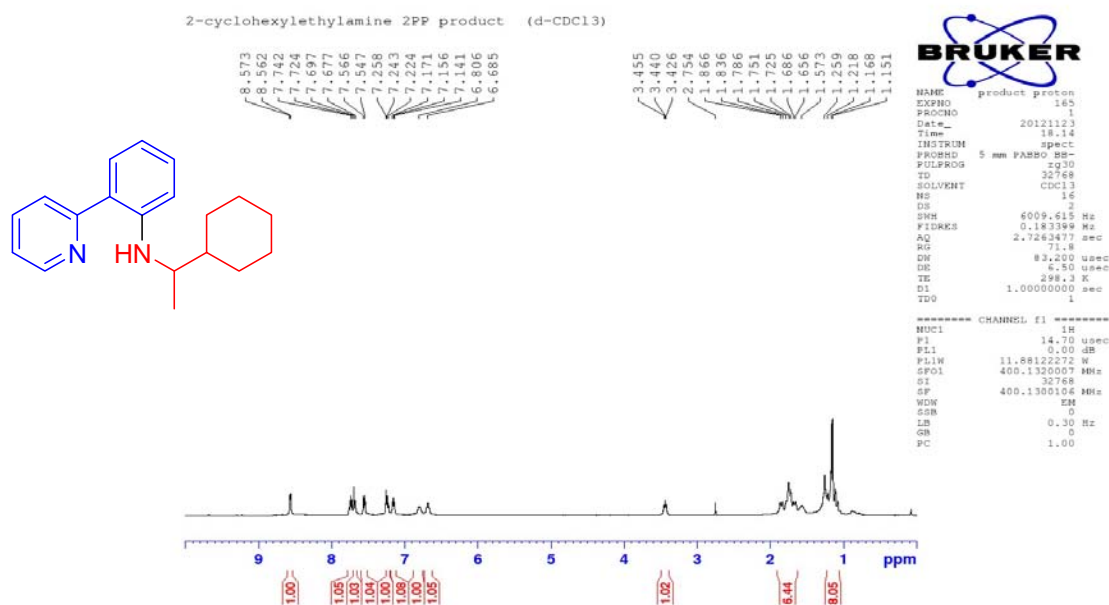

<sup>13</sup>C NMR spectrum of *N*-(1-cyclohexylethyl)-2-(pyridin-2-yl)benzenamine

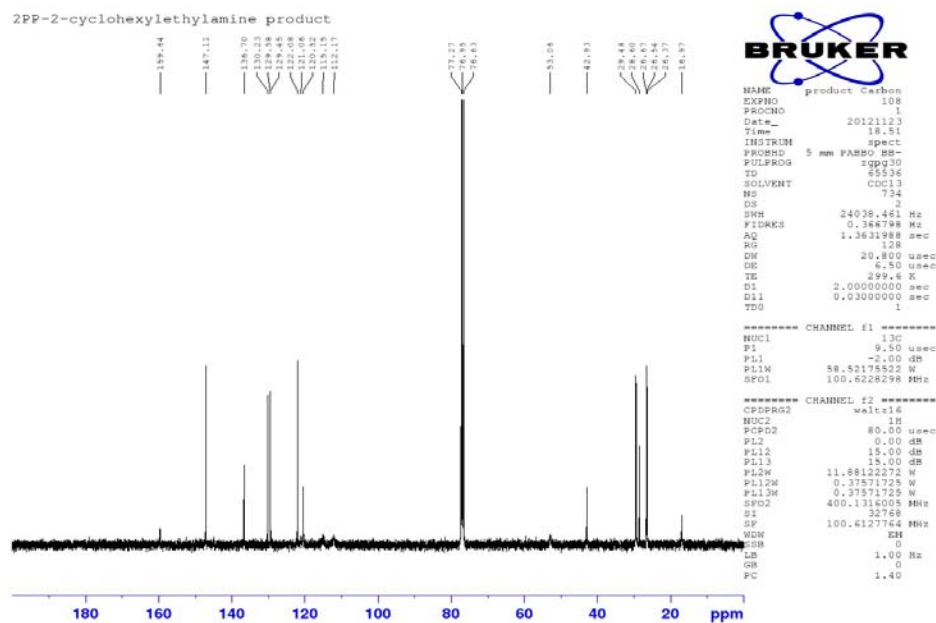

<sup>1</sup>H NMR spectrum of *N*-(1-methoxypropan-2-yl)-2-(pyridin-2-yl)aniline

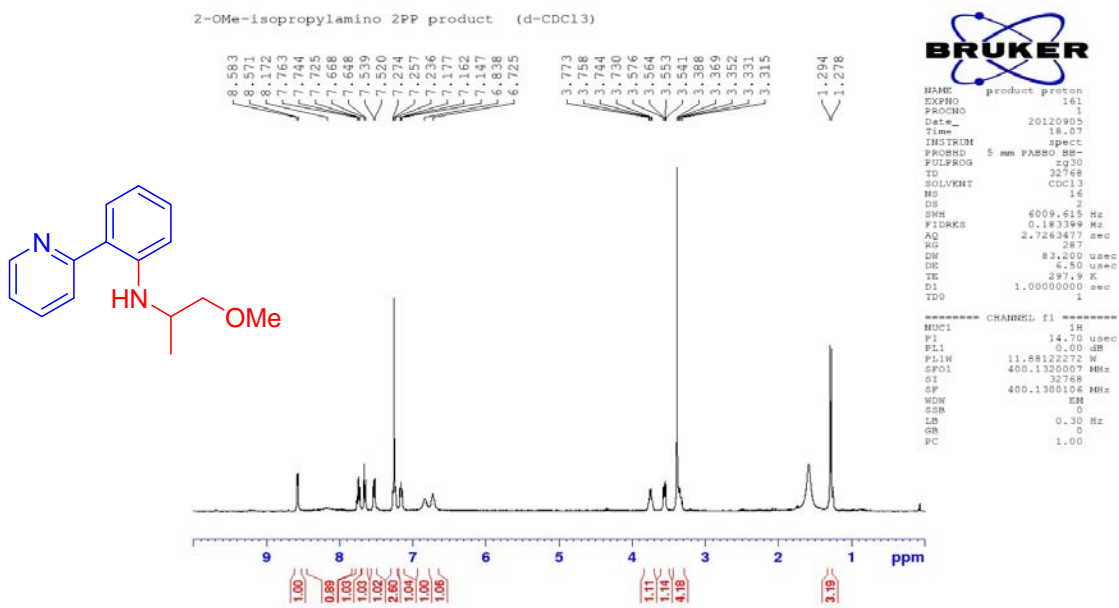

<sup>13</sup>C NMR spectrum of *N*-(1-methoxypropan-2-yl)-2-(pyridin-2-yl)aniline

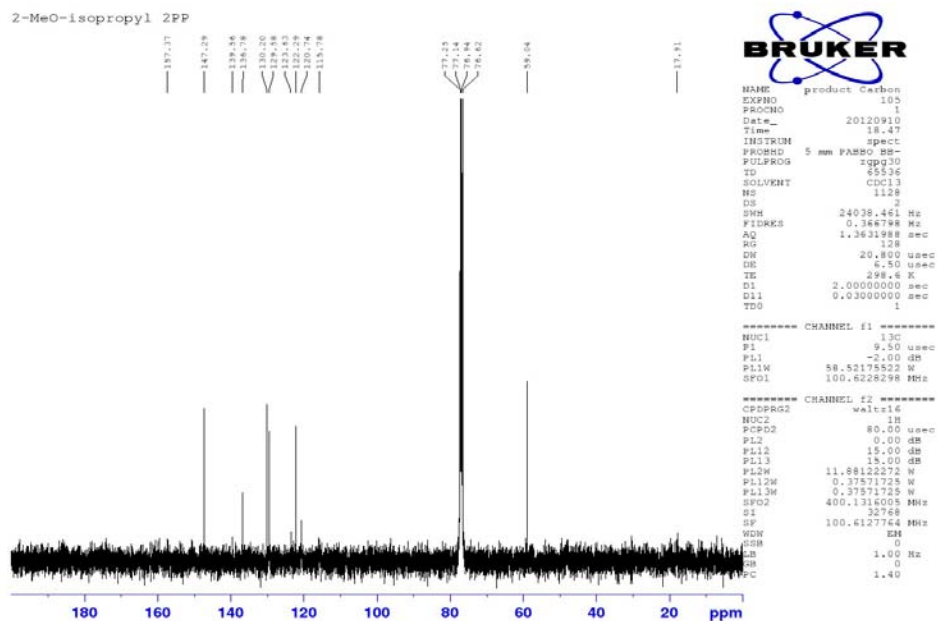

<sup>1</sup>H NMR spectrum of 1-(4-bromo-2-(cyclopentylamino)phenyl)ethanone





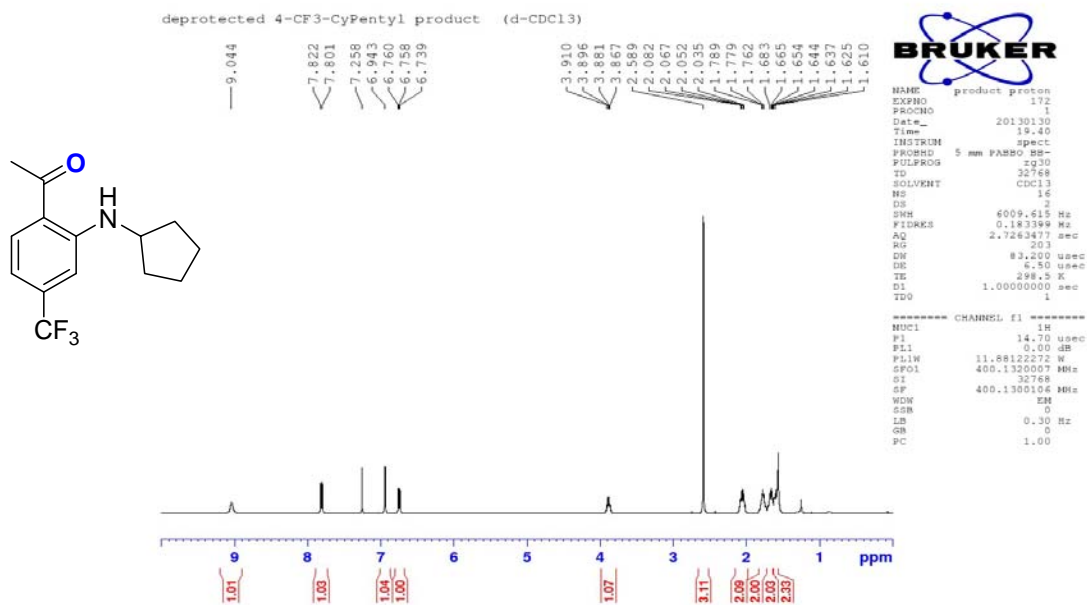

<sup>13</sup>C NMR spectrum of 1-(2-(cyclopentylamino)-4-(trifluoromethyl)phenyl)ethanone

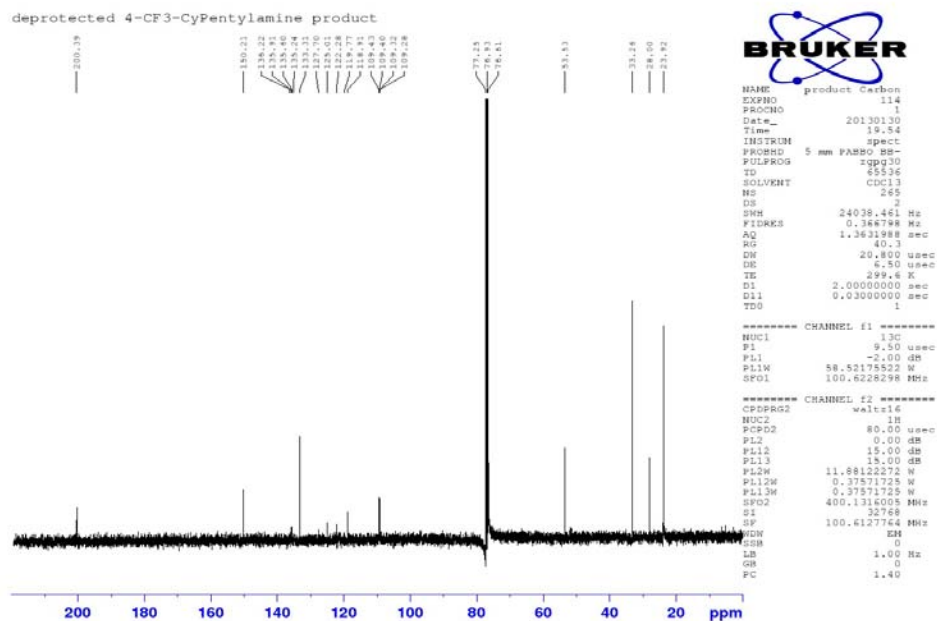

<sup>1</sup>H NMR spectrum of 1-(2-(cyclopentylamino)-4-nitrophenyl)ethanone

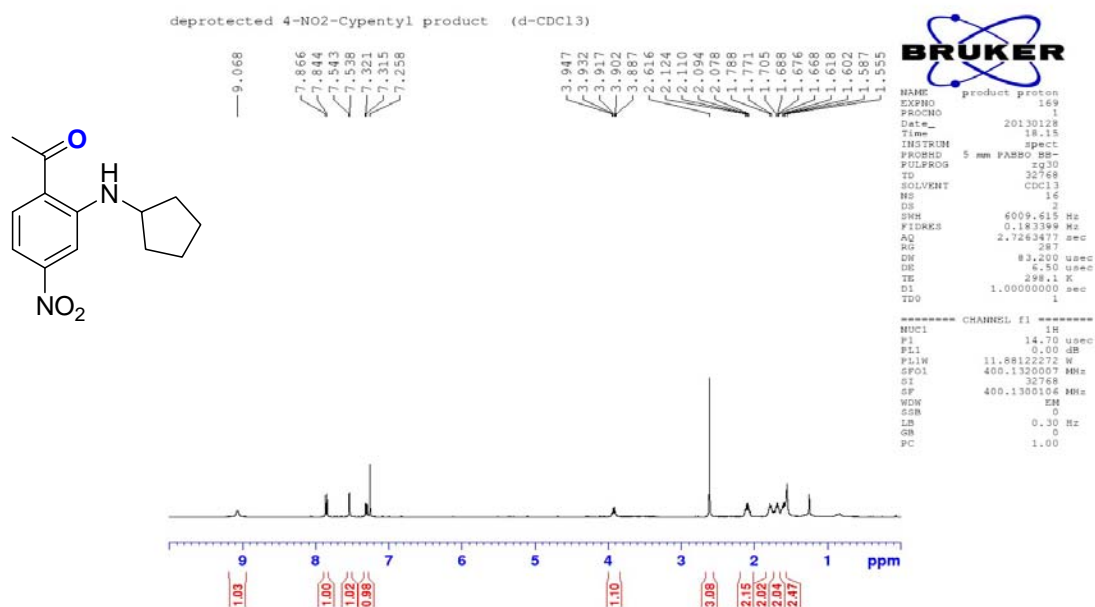

<sup>13</sup>C NMR spectrum of 1-(2-(cyclopentylamino)-4-nitrophenyl)ethanone

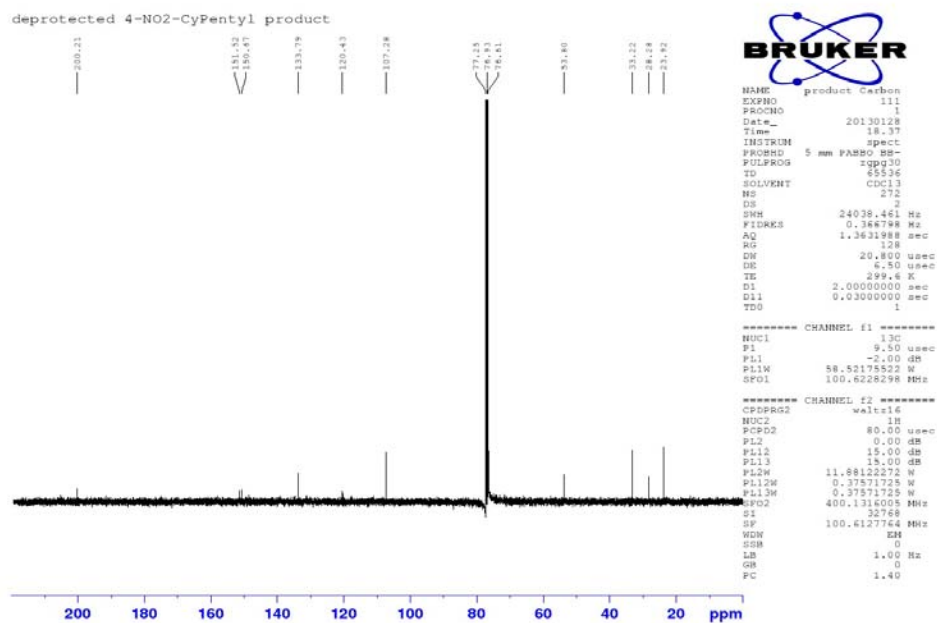

<sup>1</sup>H NMR spectrum of 1-(2-(isopropylamino)-4-nitrophenyl)ethanone

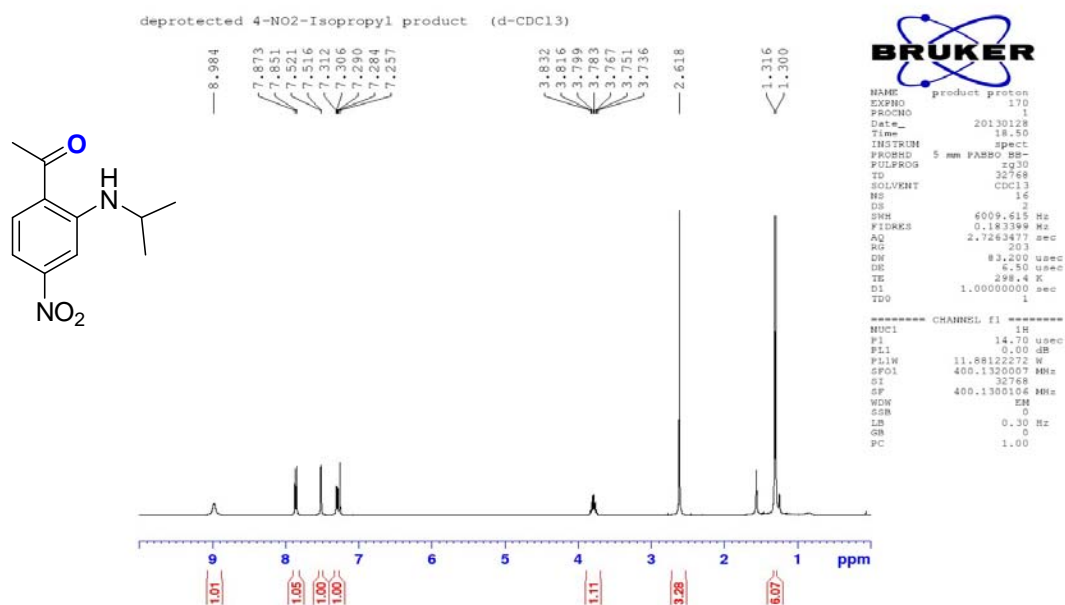

<sup>13</sup>C NMR spectrum of 1-(2-(isopropylamino)-4-nitrophenyl)ethanone

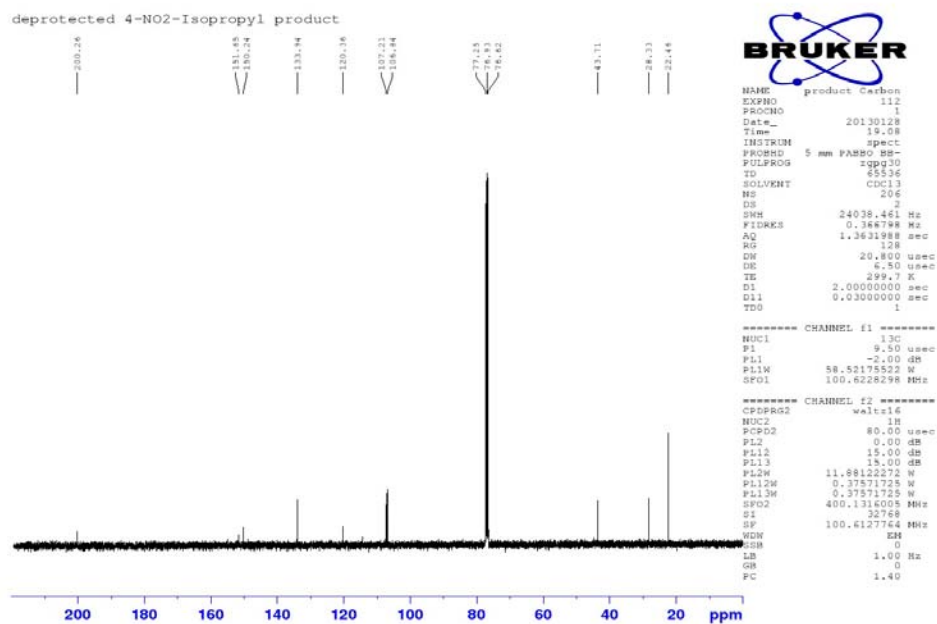

Supplement: c3cc42937g.pdf [file c3cc42937g.pdf]
